# Supplementary material for: Alcohol Exposure Induces Nucleolar Stress and Apoptosis in Mouse Neural Stem Cells and Late-Term Fetal Brain
Source: MDPI journal article supplement (doi:10.3390/cells13050440), 2024-03-02
Supplement: s1 [file s1]

Supplemental Information

Huang et al.

Nucleolar Stress in Alcohol-Exposed Mouse Neural Stem Cells and Late-Term Fetal Brain

Figure S1.

Figure S2.

Tables S1 – S5.

**Figure S1. Conditional quantile normalization (cqn) corrects for gene-length bias in RNA-Seq data from mouse fetal brain.** (a) RNA-Seq data from the E17.5 fetal brain analyzed using DE-Seq shows coupling between gene length and fold-change. (b) After applying cqn, fold-change is no longer skewed by gene length. The line is a linear regression. Data represent n=8 letters per group and four fetal brains pooled per litter.

**Figure S2. Alcohol exposure induces nucleolar dissolution in primary neural stem cells (NSCs).** Images are identical to Figure 3a but are expanded to separately visualize nuclei (DAPI, blue), the immunostain for nucleolar proteins UBF (a, green), fibrillarin (b, green), and nucleolin (c, green), and the merged channels. The merged channel images are presented in Figure 3a.

# Supplemental Figure 1

1A

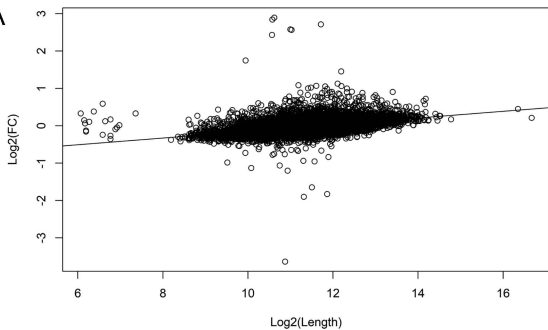

1B

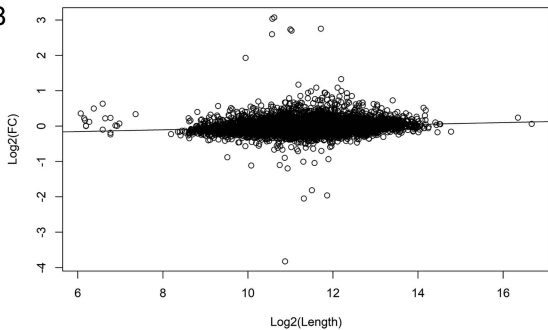

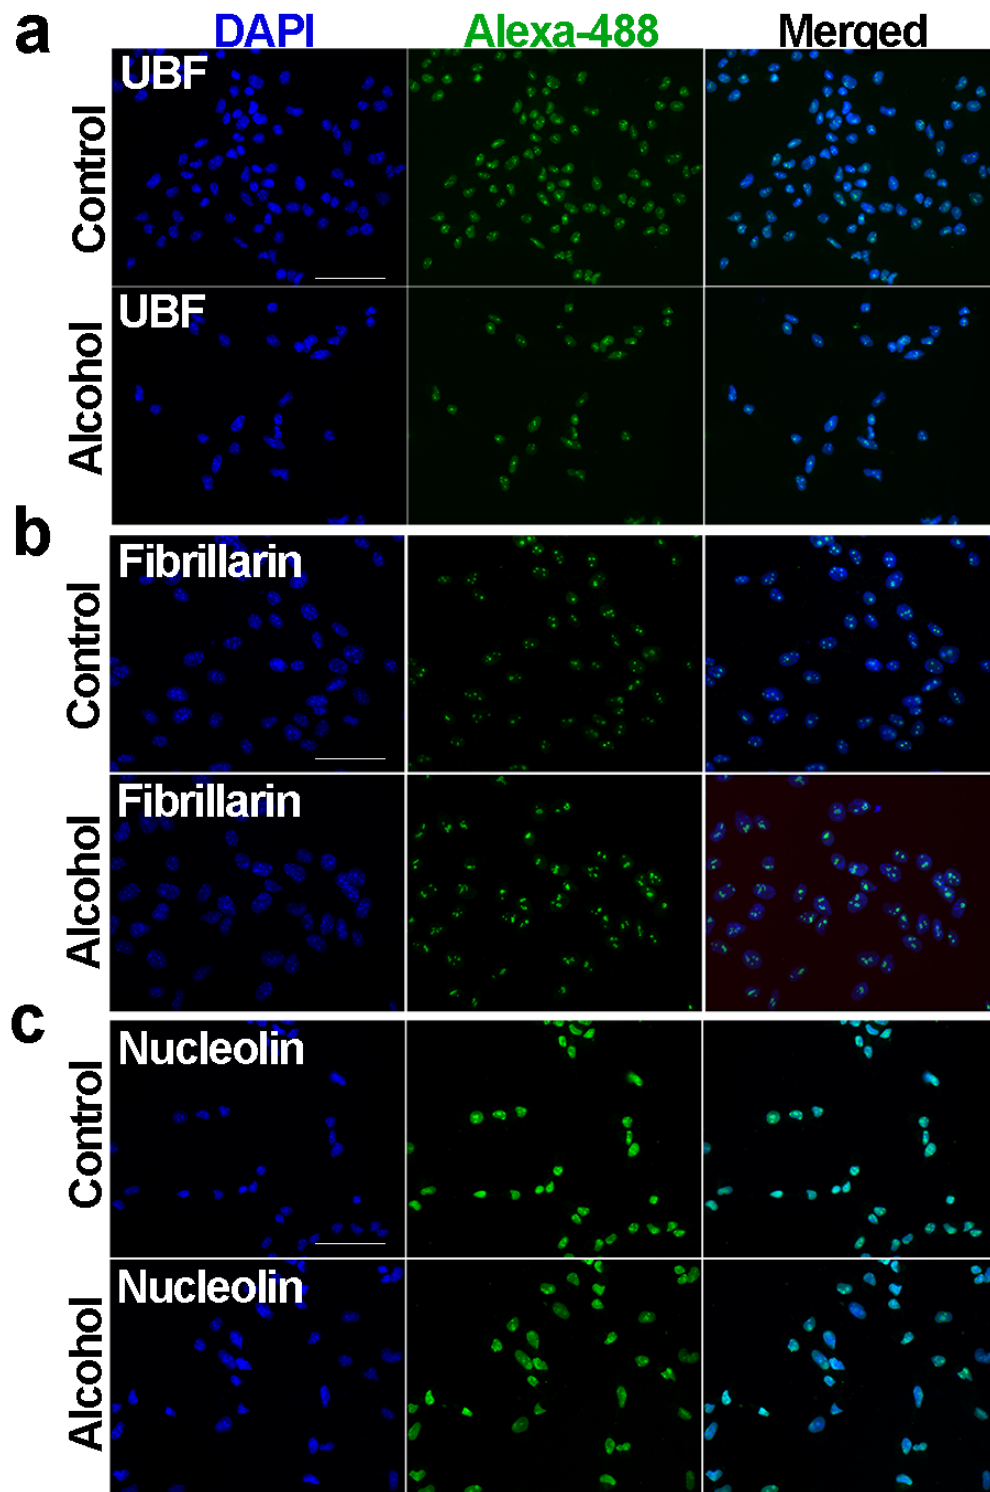

**Figure S2. Alcohol exposure induces nucleolar dissolution in primary neural stem cells (NSCs).** Images are identical to Figure 3a but are expanded to separately visualize nuclei (DAPI, blue), the immunostain for nucleolar proteins UBF (a, green), fibrillarin (b, green), and nucleolin (c, green), and the merged channels. The merged channel images are presented in Figure 3a.

**Table S1 - List of 2848 genes differentially expressed in Alcohol-Exposed Fetal Brain.**

| <b>Gene Name</b> | <b>Fold Change<br/>(Alc/Control)</b> | <b>P value</b> | <b>P adj</b> |
|------------------|--------------------------------------|----------------|--------------|
| <i>Sh3pxd2a</i>  | 1.25                                 | 6.87E-14       | 5.43E-10     |
| <i>Ppp1r3b</i>   | 1.58                                 | 8.28E-14       | 5.43E-10     |
| <i>Itih2</i>     | 2.13                                 | 5.07E-13       | 2.21E-09     |
| <i>Wdr82</i>     | 0.88                                 | 2.30E-12       | 7.55E-09     |
| <i>Grin2b</i>    | 1.25                                 | 5.32E-12       | 1.40E-08     |
| <i>Fn1</i>       | 1.47                                 | 9.05E-12       | 1.98E-08     |
| <i>Alb</i>       | 6.65                                 | 1.38E-11       | 2.00E-08     |
| <i>Psmc8</i>     | 0.89                                 | 1.24E-11       | 2.00E-08     |
| <i>Hsd17b10</i>  | 0.88                                 | 1.20E-11       | 2.00E-08     |
| <i>Itih5</i>     | 1.55                                 | 1.78E-11       | 2.18E-08     |
| <i>Hmgcs2</i>    | 1.35                                 | 1.83E-11       | 2.18E-08     |
| <i>Fbn1</i>      | 1.36                                 | 2.30E-11       | 2.51E-08     |
| <i>Med11</i>     | 0.83                                 | 4.02E-11       | 4.05E-08     |
| <i>Msi2</i>      | 1.16                                 | 4.65E-11       | 4.11E-08     |
| <i>Ndufa13</i>   | 0.84                                 | 4.70E-11       | 4.11E-08     |
| <i>Ahnak</i>     | 1.36                                 | 5.69E-11       | 4.66E-08     |
| <i>Nagk</i>      | 0.85                                 | 1.28E-10       | 9.85E-08     |
| <i>Afp</i>       | 6.51                                 | 1.84E-10       | 1.34E-07     |
| <i>Lrp1</i>      | 1.08                                 | 2.09E-10       | 1.44E-07     |
| <i>Apoa1</i>     | 3.81                                 | 2.28E-10       | 1.49E-07     |
| <i>Col4a1</i>    | 1.29                                 | 3.07E-10       | 1.91E-07     |
| <i>Col4a2</i>    | 1.26                                 | 3.29E-10       | 1.96E-07     |
| <i>Psmc1</i>     | 0.91                                 | 3.78E-10       | 2.15E-07     |
| <i>Hsd17b12</i>  | 0.86                                 | 4.22E-10       | 2.30E-07     |
| <i>Tubb3</i>     | 0.95                                 | 6.21E-10       | 3.25E-07     |
| <i>Cyp1b1</i>    | 1.75                                 | 6.83E-10       | 3.44E-07     |
| <i>Tmem192</i>   | 0.80                                 | 7.39E-10       | 3.59E-07     |
| <i>Ahsg</i>      | 6.07                                 | 7.80E-10       | 3.65E-07     |
| <i>Vwf</i>       | 1.30                                 | 8.80E-10       | 3.98E-07     |
| <i>Hspg2</i>     | 1.23                                 | 9.45E-10       | 4.13E-07     |
| <i>Atf4</i>      | 0.80                                 | 1.46E-09       | 6.01E-07     |
| <i>Thsd4</i>     | 1.42                                 | 1.47E-09       | 6.01E-07     |
| <i>Taok1</i>     | 1.12                                 | 1.60E-09       | 6.36E-07     |
| <i>Cct5</i>      | 0.88                                 | 1.72E-09       | 6.63E-07     |
| <i>Igsf3</i>     | 1.10                                 | 1.98E-09       | 7.43E-07     |
| <i>Mthfd2</i>    | 0.66                                 | 2.26E-09       | 8.17E-07     |
| <i>Trf</i>       | 2.26                                 | 2.31E-09       | 8.17E-07     |
| <i>Rpl15</i>     | 0.90                                 | 2.59E-09       | 8.70E-07     |
| <i>Bsn</i>       | 1.03                                 | 2.54E-09       | 8.70E-07     |
| <i>Cox6a1</i>    | 0.88                                 | 2.69E-09       | 8.83E-07     |
| <i>Lpp</i>       | 1.20                                 | 2.77E-09       | 8.86E-07     |
| <i>Med30</i>     | 0.87                                 | 3.00E-09       | 9.15E-07     |
| <i>Fga</i>       | 6.75                                 | 3.00E-09       | 9.15E-07     |
| <i>Farsb</i>     | 0.87                                 | 3.37E-09       | 9.69E-07     |
| <i>Zfp704</i>    | 1.10                                 | 3.41E-09       | 9.69E-07     |
| <i>Park7</i>     | 0.91                                 | 3.47E-09       | 9.69E-07     |

|                 |      |          |          |
|-----------------|------|----------|----------|
| <i>Hif3a</i>    | 1.34 | 3.42E-09 | 9.69E-07 |
| <i>Nfasc</i>    | 1.14 | 3.62E-09 | 9.87E-07 |
| <i>Cops7a</i>   | 0.85 | 4.08E-09 | 1.09E-06 |
| <i>Prmt5</i>    | 0.89 | 4.35E-09 | 1.14E-06 |
| <i>Anpep</i>    | 1.65 | 5.46E-09 | 1.40E-06 |
| <i>Coa3</i>     | 0.87 | 6.01E-09 | 1.48E-06 |
| <i>Dctn3</i>    | 0.89 | 5.95E-09 | 1.48E-06 |
| <i>Usmg5</i>    | 0.83 | 6.43E-09 | 1.56E-06 |
| <i>Ndufs2</i>   | 0.89 | 7.61E-09 | 1.81E-06 |
| <i>Tbcb</i>     | 0.85 | 8.02E-09 | 1.88E-06 |
| <i>Aimp2</i>    | 0.82 | 8.33E-09 | 1.91E-06 |
| <i>Tkt</i>      | 0.88 | 9.06E-09 | 2.05E-06 |
| <i>Cbl</i>      | 1.16 | 9.30E-09 | 2.07E-06 |
| <i>Hlf</i>      | 1.27 | 9.48E-09 | 2.07E-06 |
| <i>Reln</i>     | 1.32 | 9.67E-09 | 2.08E-06 |
| <i>Mrpl11</i>   | 0.83 | 1.06E-08 | 2.25E-06 |
| <i>Tnrc6b</i>   | 1.12 | 1.22E-08 | 2.53E-06 |
| <i>Actg1</i>    | 0.92 | 1.28E-08 | 2.63E-06 |
| <i>Thbs2</i>    | 1.42 | 1.33E-08 | 2.67E-06 |
| <i>Lpar1</i>    | 1.32 | 1.34E-08 | 2.67E-06 |
| <i>Kcnq3</i>    | 1.25 | 1.44E-08 | 2.77E-06 |
| <i>Cops4</i>    | 0.90 | 1.44E-08 | 2.77E-06 |
| <i>Atxn10</i>   | 0.90 | 1.55E-08 | 2.94E-06 |
| <i>Flnb</i>     | 1.12 | 1.84E-08 | 3.44E-06 |
| <i>Col6a2</i>   | 1.68 | 1.88E-08 | 3.44E-06 |
| <i>Sumo3</i>    | 0.89 | 1.89E-08 | 3.44E-06 |
| <i>Cops5</i>    | 0.89 | 1.98E-08 | 3.50E-06 |
| <i>Igf2</i>     | 1.53 | 1.97E-08 | 3.50E-06 |
| <i>Dapk3</i>    | 0.87 | 2.37E-08 | 4.14E-06 |
| <i>Scara3</i>   | 1.23 | 2.43E-08 | 4.18E-06 |
| <i>Lpgat1</i>   | 1.03 | 2.64E-08 | 4.46E-06 |
| <i>Rorb</i>     | 1.21 | 2.66E-08 | 4.46E-06 |
| <i>Spag7</i>    | 0.92 | 2.73E-08 | 4.52E-06 |
| <i>Znhit1</i>   | 0.86 | 2.99E-08 | 4.90E-06 |
| <i>Ndufa6</i>   | 0.91 | 3.13E-08 | 5.06E-06 |
| <i>Fgg</i>      | 8.22 | 3.20E-08 | 5.11E-06 |
| <i>Gpr4</i>     | 1.35 | 3.42E-08 | 5.40E-06 |
| <i>Nudt19</i>   | 0.85 | 3.53E-08 | 5.51E-06 |
| <i>Psph</i>     | 0.79 | 4.52E-08 | 6.96E-06 |
| <i>Psemb6</i>   | 0.91 | 5.08E-08 | 7.55E-06 |
| <i>Col5a1</i>   | 1.53 | 5.06E-08 | 7.55E-06 |
| <i>Sars</i>     | 0.89 | 5.12E-08 | 7.55E-06 |
| <i>Grcc10</i>   | 0.90 | 5.13E-08 | 7.55E-06 |
| <i>BC031181</i> | 0.94 | 5.22E-08 | 7.60E-06 |
| <i>Wnk1</i>     | 1.11 | 5.49E-08 | 7.91E-06 |
| <i>Eif3g</i>    | 0.94 | 5.56E-08 | 7.92E-06 |
| <i>Col6a3</i>   | 1.66 | 5.97E-08 | 8.41E-06 |
| <i>Mrps6</i>    | 0.88 | 6.11E-08 | 8.51E-06 |
| <i>Mrpl15</i>   | 0.80 | 6.64E-08 | 9.07E-06 |

|                      |      |          |          |
|----------------------|------|----------|----------|
| <i>Pσμα7</i>         | 0.92 | 6.62E-08 | 9.07E-06 |
| <i>Cct3</i>          | 0.87 | 7.03E-08 | 9.49E-06 |
| <i>Amotl1</i>        | 1.12 | 7.10E-08 | 9.49E-06 |
| <i>Ap1m1</i>         | 0.92 | 7.45E-08 | 9.86E-06 |
| <i>Fat3</i>          | 1.13 | 7.66E-08 | 1.00E-05 |
| <i>Ppia</i>          | 0.90 | 7.76E-08 | 1.01E-05 |
| <i>Ndufa10</i>       | 0.90 | 7.93E-08 | 1.01E-05 |
| <i>Yars</i>          | 0.83 | 7.97E-08 | 1.01E-05 |
| <i>Zbtb37</i>        | 1.22 | 8.18E-08 | 1.03E-05 |
| <i>Aebp1</i>         | 1.71 | 8.71E-08 | 1.09E-05 |
| <i>Kdr</i>           | 1.17 | 8.93E-08 | 1.10E-05 |
| <i>Ndufa9</i>        | 0.89 | 9.07E-08 | 1.11E-05 |
| <i>Ndufs8</i>        | 0.80 | 9.23E-08 | 1.12E-05 |
| <i>Morn4</i>         | 0.93 | 9.31E-08 | 1.12E-05 |
| <i>Tmem120a</i>      | 0.87 | 1.00E-07 | 1.19E-05 |
| <i>Phb2</i>          | 0.92 | 1.00E-07 | 1.19E-05 |
| <i>Tmem170b</i>      | 1.07 | 1.05E-07 | 1.23E-05 |
| <i>Srm</i>           | 0.89 | 1.07E-07 | 1.24E-05 |
| <i>Phc3</i>          | 1.10 | 1.09E-07 | 1.25E-05 |
| <i>Foxd1</i>         | 1.58 | 1.17E-07 | 1.32E-05 |
| <i>Prmt7</i>         | 0.81 | 1.16E-07 | 1.32E-05 |
| <i>Dcp2</i>          | 1.07 | 1.21E-07 | 1.36E-05 |
| <i>Lox</i>           | 1.93 | 1.28E-07 | 1.42E-05 |
| <i>Hint1</i>         | 0.89 | 1.29E-07 | 1.42E-05 |
| <i>Ddx25</i>         | 0.89 | 1.32E-07 | 1.44E-05 |
| <i>Tnrc6c</i>        | 1.07 | 1.34E-07 | 1.45E-05 |
| <i>Hipk1</i>         | 1.07 | 1.43E-07 | 1.53E-05 |
| <i>Rpl41</i>         | 0.87 | 1.56E-07 | 1.65E-05 |
| <i>Sipa1l1</i>       | 1.13 | 1.56E-07 | 1.65E-05 |
| <i>Gm6787</i>        | 0.86 | 1.69E-07 | 1.77E-05 |
| <i>Gjb2</i>          | 1.81 | 1.71E-07 | 1.78E-05 |
| <i>Klhl7</i>         | 1.18 | 1.73E-07 | 1.79E-05 |
| <i>Adam12</i>        | 1.33 | 1.75E-07 | 1.79E-05 |
| <i>Kctd12</i>        | 1.13 | 1.91E-07 | 1.93E-05 |
| <i>Ndufaf5</i>       | 0.79 | 1.92E-07 | 1.93E-05 |
| <i>Gsk3b</i>         | 1.06 | 2.01E-07 | 1.98E-05 |
| <i>Mrc1</i>          | 1.58 | 2.00E-07 | 1.98E-05 |
| <i>Pafah1b3</i>      | 0.90 | 2.03E-07 | 1.98E-05 |
| <i>E130201H02Rik</i> | 0.91 | 2.03E-07 | 1.98E-05 |
| <i>Hoxa5</i>         | 0.07 | 2.07E-07 | 2.00E-05 |
| <i>Lamc1</i>         | 1.18 | 2.08E-07 | 2.00E-05 |
| <i>Ccdc93</i>        | 1.05 | 2.13E-07 | 2.02E-05 |
| <i>Lamc3</i>         | 1.54 | 2.14E-07 | 2.02E-05 |
| <i>Col4a5</i>        | 1.34 | 2.12E-07 | 2.02E-05 |
| <i>Olfml2a</i>       | 1.59 | 2.20E-07 | 2.06E-05 |
| <i>Igf2r</i>         | 1.16 | 2.24E-07 | 2.08E-05 |
| <i>Otub1</i>         | 0.91 | 2.37E-07 | 2.17E-05 |
| <i>Foxc2</i>         | 1.92 | 2.36E-07 | 2.17E-05 |
| <i>Abca9</i>         | 1.56 | 2.46E-07 | 2.24E-05 |

|                  |      |          |          |
|------------------|------|----------|----------|
| <i>Uros</i>      | 0.84 | 2.50E-07 | 2.24E-05 |
| <i>Mrpl34</i>    | 0.90 | 2.49E-07 | 2.24E-05 |
| <i>Mdga1</i>     | 1.10 | 2.53E-07 | 2.26E-05 |
| <i>Mrc2</i>      | 1.32 | 2.57E-07 | 2.27E-05 |
| <i>Rpl3</i>      | 0.92 | 2.58E-07 | 2.27E-05 |
| <i>Chchd6</i>    | 0.83 | 2.62E-07 | 2.28E-05 |
| <i>Dst</i>       | 1.04 | 2.68E-07 | 2.32E-05 |
| <i>Sept5</i>     | 0.93 | 2.75E-07 | 2.37E-05 |
| <i>Epas1</i>     | 1.18 | 2.88E-07 | 2.46E-05 |
| <i>Fam168a</i>   | 1.01 | 3.14E-07 | 2.67E-05 |
| <i>Rc3h1</i>     | 1.06 | 3.21E-07 | 2.71E-05 |
| <i>Colec12</i>   | 1.66 | 3.23E-07 | 2.71E-05 |
| <i>Drap1</i>     | 0.91 | 3.36E-07 | 2.81E-05 |
| <i>Srgap3</i>    | 1.11 | 3.49E-07 | 2.89E-05 |
| <i>Tsc22d2</i>   | 1.07 | 3.65E-07 | 3.01E-05 |
| <i>Cops6</i>     | 0.87 | 3.85E-07 | 3.15E-05 |
| <i>Prrc2b</i>    | 1.03 | 4.12E-07 | 3.35E-05 |
| <i>Nfat5</i>     | 1.29 | 4.14E-07 | 3.35E-05 |
| <i>Gxylt1</i>    | 1.24 | 4.22E-07 | 3.38E-05 |
| <i>Fgb</i>       | 8.43 | 4.23E-07 | 3.38E-05 |
| <i>Ino80d</i>    | 1.10 | 4.52E-07 | 3.59E-05 |
| <i>Cacna1e</i>   | 1.22 | 4.58E-07 | 3.61E-05 |
| <i>Col5a2</i>    | 1.31 | 4.76E-07 | 3.73E-05 |
| <i>Serpinb1b</i> | 0.47 | 4.81E-07 | 3.75E-05 |
| <i>Atp5b</i>     | 0.89 | 4.85E-07 | 3.76E-05 |
| <i>Col1a1</i>    | 1.99 | 4.89E-07 | 3.77E-05 |
| <i>Ankrd44</i>   | 1.11 | 5.02E-07 | 3.84E-05 |
| <i>Bmp6</i>      | 1.44 | 5.08E-07 | 3.84E-05 |
| <i>Vapa</i>      | 0.94 | 5.10E-07 | 3.84E-05 |
| <i>Psmc4</i>     | 0.90 | 5.05E-07 | 3.84E-05 |
| <i>Ildr2</i>     | 1.18 | 5.30E-07 | 3.97E-05 |
| <i>Tomm40l</i>   | 0.82 | 5.33E-07 | 3.97E-05 |
| <i>Ankrd52</i>   | 1.09 | 5.54E-07 | 4.10E-05 |
| <i>Pcnx</i>      | 1.03 | 5.62E-07 | 4.12E-05 |
| <i>Agrn</i>      | 1.07 | 5.63E-07 | 4.12E-05 |
| <i>Phb</i>       | 0.87 | 5.71E-07 | 4.16E-05 |
| <i>Gja1</i>      | 1.34 | 5.78E-07 | 4.18E-05 |
| <i>Ppme1</i>     | 0.91 | 5.93E-07 | 4.27E-05 |
| <i>Dnajc8</i>    | 0.94 | 6.13E-07 | 4.39E-05 |
| <i>Eef1e1</i>    | 0.89 | 6.60E-07 | 4.67E-05 |
| <i>Lcor</i>      | 1.22 | 6.65E-07 | 4.67E-05 |
| <i>Ttc39b</i>    | 1.11 | 6.67E-07 | 4.67E-05 |
| <i>Mrps12</i>    | 0.88 | 6.60E-07 | 4.67E-05 |
| <i>Nt5c3</i>     | 0.88 | 6.82E-07 | 4.75E-05 |
| <i>Smyd5</i>     | 0.84 | 6.85E-07 | 4.75E-05 |
| <i>Asns</i>      | 0.78 | 7.04E-07 | 4.85E-05 |
| <i>Mrpl54</i>    | 0.80 | 7.46E-07 | 5.09E-05 |
| <i>Ahsa1</i>     | 0.93 | 7.50E-07 | 5.09E-05 |
| <i>Sdhb</i>      | 0.88 | 7.43E-07 | 5.09E-05 |

|                      |      |          |          |
|----------------------|------|----------|----------|
| <i>Lamb2</i>         | 1.20 | 7.83E-07 | 5.29E-05 |
| <i>Dennd5b</i>       | 1.08 | 8.12E-07 | 5.45E-05 |
| <i>Celsr2</i>        | 1.09 | 8.59E-07 | 5.74E-05 |
| <i>Slc13a4</i>       | 1.74 | 9.19E-07 | 6.01E-05 |
| <i>Zfp568</i>        | 1.10 | 9.17E-07 | 6.01E-05 |
| <i>Ndufb7</i>        | 0.86 | 9.06E-07 | 6.01E-05 |
| <i>Glg1</i>          | 1.14 | 9.22E-07 | 6.01E-05 |
| <i>Nsdhl</i>         | 0.83 | 9.20E-07 | 6.01E-05 |
| <i>Dynll1</i>        | 0.88 | 9.34E-07 | 6.04E-05 |
| <i>Fam136a</i>       | 0.90 | 9.37E-07 | 6.04E-05 |
| <i>Coq7</i>          | 0.84 | 9.41E-07 | 6.04E-05 |
| <i>Nav2</i>          | 1.13 | 9.45E-07 | 6.04E-05 |
| <i>Gars</i>          | 0.88 | 9.97E-07 | 6.34E-05 |
| <i>Flrt1</i>         | 1.12 | 1.01E-06 | 6.38E-05 |
| <i>Igf1r</i>         | 1.16 | 1.01E-06 | 6.38E-05 |
| <i>Dync1li2</i>      | 1.05 | 1.02E-06 | 6.42E-05 |
| <i>Pzp</i>           | 2.52 | 1.03E-06 | 6.44E-05 |
| <i>Ubn2</i>          | 1.15 | 1.05E-06 | 6.54E-05 |
| <i>Eif3d</i>         | 0.89 | 1.07E-06 | 6.59E-05 |
| <i>Rad54l2</i>       | 1.07 | 1.07E-06 | 6.59E-05 |
| <i>1300002E11Rik</i> | 1.24 | 1.12E-06 | 6.88E-05 |
| <i>Elp3</i>          | 0.91 | 1.16E-06 | 7.08E-05 |
| <i>Slc4a1</i>        | 1.79 | 1.20E-06 | 7.20E-05 |
| <i>Mdh2</i>          | 0.91 | 1.21E-06 | 7.20E-05 |
| <i>Cars</i>          | 0.80 | 1.20E-06 | 7.20E-05 |
| <i>Cdh1</i>          | 2.13 | 1.21E-06 | 7.20E-05 |
| <i>Csnk1g1</i>       | 1.08 | 1.20E-06 | 7.20E-05 |
| <i>Nufip2</i>        | 1.08 | 1.22E-06 | 7.26E-05 |
| <i>Gucy1a2</i>       | 1.11 | 1.23E-06 | 7.27E-05 |
| <i>Fdft1</i>         | 0.82 | 1.29E-06 | 7.58E-05 |
| <i>Lsm4</i>          | 0.89 | 1.30E-06 | 7.62E-05 |
| <i>Serinc5</i>       | 1.15 | 1.32E-06 | 7.69E-05 |
| <i>Vti1b</i>         | 0.89 | 1.36E-06 | 7.88E-05 |
| <i>Chd2</i>          | 1.15 | 1.39E-06 | 8.03E-05 |
| <i>Trio</i>          | 1.04 | 1.42E-06 | 8.15E-05 |
| <i>Rbx1</i>          | 0.88 | 1.42E-06 | 8.15E-05 |
| <i>Man2a1</i>        | 1.20 | 1.44E-06 | 8.19E-05 |
| <i>Mvd</i>           | 0.80 | 1.47E-06 | 8.32E-05 |
| <i>Cct6a</i>         | 0.94 | 1.48E-06 | 8.33E-05 |
| <i>Ndufb9</i>        | 0.88 | 1.52E-06 | 8.52E-05 |
| <i>Ccdc50</i>        | 1.04 | 1.52E-06 | 8.52E-05 |
| <i>Bckdhb</i>        | 0.78 | 1.54E-06 | 8.56E-05 |
| <i>Ssu72</i>         | 0.86 | 1.62E-06 | 9.01E-05 |
| <i>Cdh5</i>          | 1.40 | 1.68E-06 | 9.30E-05 |
| <i>Zfp36l1</i>       | 1.19 | 1.71E-06 | 9.39E-05 |
| <i>Itpa</i>          | 0.87 | 1.71E-06 | 9.39E-05 |
| <i>Bud31</i>         | 0.93 | 1.73E-06 | 9.46E-05 |
| <i>Sqle</i>          | 0.86 | 1.75E-06 | 9.50E-05 |
| <i>Fat4</i>          | 1.15 | 1.77E-06 | 9.59E-05 |



|                |      |          |             |
|----------------|------|----------|-------------|
| <i>Kars</i>    | 0.89 | 1.81E-06 | 9.74E-05    |
| <i>Ppa1</i>    | 0.91 | 1.81E-06 | 9.75E-05    |
| <i>Zfp871</i>  | 1.12 | 1.84E-06 | 9.84E-05    |
| <i>Dars</i>    | 0.89 | 1.91E-06 | 0.00010     |
| <i>Sdhc</i>    | 0.91 | 1.92E-06 | 0.00010162  |
| <i>Insr</i>    | 1.12 | 1.93E-06 | 0.000102041 |
| <i>Vasn</i>    | 1.32 | 1.94E-06 | 0.000102339 |
| <i>Mmp2</i>    | 1.27 | 1.96E-06 | 0.000102739 |
| <i>Tbx15</i>   | 1.93 | 1.99E-06 | 0.000103766 |
| <i>Ywhaq</i>   | 0.89 | 2.02E-06 | 0.000104946 |
| <i>Tulp4</i>   | 1.06 | 2.06E-06 | 0.000106529 |
| <i>Islr</i>    | 1.53 | 2.10E-06 | 0.000108395 |
| <i>Purb</i>    | 1.08 | 2.24E-06 | 0.000115274 |
| <i>Adam22</i>  | 1.08 | 2.34E-06 | 0.000119825 |
| <i>Chchd3</i>  | 0.89 | 2.35E-06 | 0.000119825 |
| <i>Cct7</i>    | 0.87 | 2.38E-06 | 0.000120889 |
| <i>Shank1</i>  | 1.11 | 2.41E-06 | 0.00012215  |
| <i>Mxra8</i>   | 1.31 | 2.44E-06 | 0.000123166 |
| <i>Hook3</i>   | 1.17 | 2.49E-06 | 0.000124795 |
| <i>Atrn1</i>   | 1.07 | 2.50E-06 | 0.000124987 |
| <i>Chchd1</i>  | 0.92 | 2.56E-06 | 0.000127584 |
| <i>Kctd13</i>  | 0.94 | 2.59E-06 | 0.000128671 |
| <i>Col12a1</i> | 1.19 | 2.65E-06 | 0.000131259 |
| <i>Slc25a5</i> | 0.93 | 2.70E-06 | 0.000132775 |
| <i>Mapkbp1</i> | 1.08 | 2.71E-06 | 0.000132803 |
| <i>Myh9</i>    | 1.14 | 2.73E-06 | 0.000133554 |
| <i>Hmcn1</i>   | 1.23 | 2.75E-06 | 0.000134025 |
| <i>Aip</i>     | 0.83 | 2.84E-06 | 0.000137972 |
| <i>Letm1</i>   | 0.89 | 2.87E-06 | 0.000138661 |
| <i>Gsto1</i>   | 0.92 | 2.90E-06 | 0.000139141 |
| <i>Kif1b</i>   | 1.03 | 2.90E-06 | 0.000139141 |
| <i>Nhp2</i>    | 0.86 | 2.98E-06 | 0.00014007  |
| <i>Tmem242</i> | 0.89 | 2.98E-06 | 0.00014007  |
| <i>Ptprf</i>   | 1.02 | 2.96E-06 | 0.00014007  |
| <i>Bub3</i>    | 0.91 | 2.96E-06 | 0.00014007  |
| <i>Asna1</i>   | 0.92 | 2.98E-06 | 0.00014007  |
| <i>Timm8b</i>  | 0.91 | 2.95E-06 | 0.00014007  |
| <i>Syde2</i>   | 1.14 | 3.00E-06 | 0.00014     |
| <i>Col18a1</i> | 1.36 | 3.08E-06 | 0.00014     |
| <i>Srp14</i>   | 0.90 | 3.06E-06 | 0.00014     |
| <i>Sec13</i>   | 0.90 | 3.08E-06 | 0.00014     |
| <i>Rpl28</i>   | 0.93 | 3.11E-06 | 0.00014     |
| <i>Ndufc2</i>  | 0.90 | 3.12E-06 | 0.00014     |
| <i>Ppp1ca</i>  | 0.93 | 3.17E-06 | 0.00014     |
| <i>Grpel1</i>  | 0.82 | 3.15E-06 | 0.00014     |
| <i>Fyco1</i>   | 1.16 | 3.14E-06 | 0.00014     |
| <i>Timm17b</i> | 0.87 | 3.16E-06 | 0.00014     |
| <i>Mrpl43</i>  | 0.91 | 3.20E-06 | 0.00014     |
| <i>Timm10</i>  | 0.87 | 3.21E-06 | 0.00014     |

|                 |      |          |             |
|-----------------|------|----------|-------------|
| <i>Zkscan2</i>  | 1.16 | 3.23E-06 | 0.00014     |
| <i>Ndufb11</i>  | 0.89 | 3.27E-06 | 0.00015     |
| <i>Nid2</i>     | 1.36 | 3.33E-06 | 0.00015     |
| <i>St3gal3</i>  | 0.84 | 3.38E-06 | 0.000150104 |
| <i>Lepr</i>     | 1.59 | 3.44E-06 | 0.00015     |
| <i>Ttbk2</i>    | 1.04 | 3.47E-06 | 0.00015     |
| <i>Mrps7</i>    | 0.86 | 3.64E-06 | 0.000159927 |
| <i>Atp5c1</i>   | 0.88 | 3.66E-06 | 0.000160268 |
| <i>Slco2a1</i>  | 1.26 | 3.75E-06 | 0.00016     |
| <i>Col15a1</i>  | 1.27 | 3.78E-06 | 0.00016     |
| <i>Tmem11</i>   | 0.88 | 3.93E-06 | 0.000169951 |
| <i>Cacna2d1</i> | 1.12 | 3.92E-06 | 0.000169951 |
| <i>Cacna1c</i>  | 1.15 | 4.00E-06 | 0.00017     |
| <i>Neo1</i>     | 1.08 | 4.01E-06 | 0.00017     |
| <i>Ostc</i>     | 0.93 | 4.07E-06 | 0.00017     |
| <i>Ubb</i>      | 0.93 | 4.14E-06 | 0.00018     |
| <i>Runx1t1</i>  | 1.12 | 4.17E-06 | 0.00018     |
| <i>Prrx1</i>    | 1.16 | 4.25E-06 | 0.000180056 |
| <i>Cfh</i>      | 1.53 | 4.29E-06 | 0.00018     |
| <i>Mrpl12</i>   | 0.88 | 4.28E-06 | 0.00018     |
| <i>Zbtb39</i>   | 1.07 | 4.46E-06 | 0.00019     |
| <i>Uqcrc1</i>   | 0.88 | 4.50E-06 | 0.00019     |
| <i>Pcdhb16</i>  | 1.16 | 4.55E-06 | 0.00019     |
| <i>Zbtb34</i>   | 1.10 | 4.54E-06 | 0.00019     |
| <i>Rpl18</i>    | 0.86 | 4.53E-06 | 0.00019     |
| <i>Txn2</i>     | 0.90 | 4.74E-06 | 0.00020     |
| <i>Mif</i>      | 0.91 | 4.79E-06 | 0.00020     |
| <i>Ranbp3l</i>  | 1.70 | 4.89E-06 | 0.00020     |
| <i>Ten1</i>     | 0.86 | 4.93E-06 | 0.00020     |
| <i>Alkbh7</i>   | 0.80 | 5.00E-06 | 0.00020     |
| <i>Mea1</i>     | 0.87 | 5.02E-06 | 0.00020     |
| <i>Fgd6</i>     | 1.12 | 5.15E-06 | 0.00021     |
| <i>Rab33a</i>   | 0.92 | 5.14E-06 | 0.00021     |
| <i>Psmc6</i>    | 0.92 | 5.32E-06 | 0.00021     |
| <i>Nphp3</i>    | 1.15 | 5.34E-06 | 0.00021     |
| <i>Actl6b</i>   | 0.94 | 5.40E-06 | 0.00022     |
| <i>Slc25a33</i> | 0.77 | 5.52E-06 | 0.000220349 |
| <i>Sh3pxd2b</i> | 1.04 | 5.57E-06 | 0.00022     |
| <i>Nav1</i>     | 1.06 | 5.72E-06 | 0.00023     |
| <i>Atp5a1</i>   | 0.91 | 5.89E-06 | 0.00023     |
| <i>Xpr1</i>     | 1.10 | 6.00E-06 | 0.00024     |
| <i>Serpinf1</i> | 1.47 | 6.05E-06 | 0.00024     |
| <i>Psmc5</i>    | 0.91 | 6.19E-06 | 0.00024     |
| <i>Thap7</i>    | 0.87 | 6.17E-06 | 0.00024     |
| <i>Tcp1</i>     | 0.89 | 6.18E-06 | 0.00024     |
| <i>Psmc3</i>    | 0.91 | 6.15E-06 | 0.00024     |
| <i>Eif3k</i>    | 0.93 | 6.19E-06 | 0.00024     |
| <i>Tead1</i>    | 1.17 | 6.11E-06 | 0.00024     |
| <i>Col4a6</i>   | 1.50 | 6.15E-06 | 0.00024     |

|                      |      |          |             |
|----------------------|------|----------|-------------|
| <i>Bcl2</i>          | 1.03 | 6.34E-06 | 0.00024     |
| <i>Ddr2</i>          | 1.38 | 6.37E-06 | 0.00024     |
| <i>Ncor2</i>         | 1.06 | 6.39E-06 | 0.00024     |
| <i>Eef1b2</i>        | 0.83 | 6.42E-06 | 0.00024     |
| <i>Aff1</i>          | 1.14 | 6.45E-06 | 0.00025     |
| <i>Acat2</i>         | 0.89 | 6.47E-06 | 0.00025     |
| <i>Ptpnb</i>         | 1.11 | 6.59E-06 | 0.00025     |
| <i>D430041D05Rik</i> | 1.10 | 6.59E-06 | 0.00025     |
| <i>Mrpl33</i>        | 0.89 | 6.63E-06 | 0.00025     |
| <i>Mafa</i>          | 0.46 | 6.79E-06 | 0.00025     |
| <i>Ndufv2</i>        | 0.90 | 6.78E-06 | 0.00025     |
| <i>Adsl</i>          | 0.86 | 6.98E-06 | 0.000259816 |
| <i>Wdfy3</i>         | 1.03 | 7.03E-06 | 0.00026     |
| <i>Slc25a1</i>       | 0.88 | 7.10E-06 | 0.00026     |
| <i>Arpc3</i>         | 0.97 | 7.11E-06 | 0.00026     |
| <i>Col1a2</i>        | 1.91 | 7.15E-06 | 0.00026     |
| <i>Banf1</i>         | 0.91 | 7.17E-06 | 0.00026     |
| <i>Fbn2</i>          | 1.23 | 7.56E-06 | 0.00028     |
| <i>Nol7</i>          | 0.91 | 7.73E-06 | 0.00028     |
| <i>Tomm40</i>        | 0.89 | 7.72E-06 | 0.00028     |
| <i>Gpc3</i>          | 1.39 | 7.70E-06 | 0.00028     |
| <i>Aen</i>           | 0.83 | 7.89E-06 | 0.00029     |
| <i>Nsd1</i>          | 1.04 | 8.04E-06 | 0.000290356 |
| <i>Spag9</i>         | 1.05 | 8.26E-06 | 0.00030     |
| <i>Ndufs4</i>        | 0.87 | 8.34E-06 | 0.00030     |
| <i>Sdk1</i>          | 1.09 | 8.35E-06 | 0.00030     |
| <i>Tm2d2</i>         | 0.92 | 8.38E-06 | 0.00030     |
| <i>Wdr18</i>         | 0.86 | 8.73E-06 | 0.00031     |
| <i>Eif3h</i>         | 0.92 | 8.76E-06 | 0.00031     |
| <i>Rpl11</i>         | 0.91 | 8.88E-06 | 0.00031     |
| <i>Slc2a12</i>       | 1.26 | 8.96E-06 | 0.00032     |
| <i>Ltbp4</i>         | 1.14 | 8.95E-06 | 0.00032     |
| <i>Slc38a6</i>       | 1.20 | 9.07E-06 | 0.00032     |
| <i>Foxc1</i>         | 1.37 | 9.05E-06 | 0.00032     |
| <i>Acer2</i>         | 1.39 | 9.09E-06 | 0.00032     |
| <i>Glyr1</i>         | 0.93 | 9.21E-06 | 0.00032     |
| <i>Zc3hav1l</i>      | 1.08 | 9.24E-06 | 0.00032     |
| <i>Gabarap</i>       | 0.91 | 9.29E-06 | 0.00032     |
| <i>Atp5j</i>         | 0.96 | 9.41E-06 | 0.00033     |
| <i>Ttll12</i>        | 0.87 | 9.49E-06 | 0.00033     |
| <i>Cox6b1</i>        | 0.92 | 9.50E-06 | 0.00033     |
| <i>Phldb2</i>        | 1.20 | 9.61E-06 | 0.000329681 |
| <i>Ndufaf3</i>       | 0.85 | 9.67E-06 | 0.00033     |
| <i>Tgm2</i>          | 1.37 | 9.72E-06 | 0.00033     |
| <i>Uba52</i>         | 0.94 | 9.88E-06 | 0.00034     |
| <i>Egflam</i>        | 1.26 | 1.01E-05 | 0.00034     |
| <i>Map3k2</i>        | 1.09 | 1.01E-05 | 0.00034     |
| <i>Psm6</i>          | 0.92 | 1.02E-05 | 0.00034     |
| <i>Clpp</i>          | 0.87 | 1.04E-05 | 0.00035     |

|                      |      |          |         |
|----------------------|------|----------|---------|
| <i>Tubb5</i>         | 0.95 | 1.04E-05 | 0.00035 |
| <i>Dhps</i>          | 0.85 | 1.05E-05 | 0.00035 |
| <i>Gnaq</i>          | 1.07 | 1.06E-05 | 0.00035 |
| <i>Uqcrq</i>         | 0.84 | 1.06E-05 | 0.00035 |
| <i>Mtx2</i>          | 0.92 | 1.07E-05 | 0.00035 |
| <i>Itgav</i>         | 1.04 | 1.07E-05 | 0.00036 |
| <i>Svil</i>          | 1.23 | 1.09E-05 | 0.00036 |
| <i>Rpsa</i>          | 0.86 | 1.09E-05 | 0.00036 |
| <i>Emilin1</i>       | 1.44 | 1.11E-05 | 0.00036 |
| <i>S100a10</i>       | 0.90 | 1.11E-05 | 0.00036 |
| <i>Trps1</i>         | 1.05 | 1.14E-05 | 0.00037 |
| <i>Hivep3</i>        | 1.08 | 1.14E-05 | 0.00037 |
| <i>Acap2</i>         | 1.14 | 1.15E-05 | 0.00037 |
| <i>Tprgl</i>         | 0.88 | 1.15E-05 | 0.00037 |
| <i>Ppp5c</i>         | 0.89 | 1.15E-05 | 0.00037 |
| <i>Plekhn1</i>       | 1.32 | 1.16E-05 | 0.00037 |
| <i>Lym2</i>          | 0.92 | 1.16E-05 | 0.00037 |
| <i>Eif2b5</i>        | 0.88 | 1.18E-05 | 0.00038 |
| <i>Dnaja1</i>        | 0.88 | 1.19E-05 | 0.00038 |
| <i>Tanc2</i>         | 1.08 | 1.21E-05 | 0.00039 |
| <i>Thsd7a</i>        | 1.14 | 1.21E-05 | 0.00039 |
| <i>Puf60</i>         | 0.88 | 1.23E-05 | 0.00039 |
| <i>Ndst1</i>         | 1.05 | 1.23E-05 | 0.00039 |
| <i>Fmod</i>          | 1.98 | 1.25E-05 | 0.00039 |
| <i>Ndufb8</i>        | 0.86 | 1.24E-05 | 0.00039 |
| <i>Cfl1</i>          | 0.97 | 1.28E-05 | 0.00040 |
| <i>Slc6a13</i>       | 1.59 | 1.29E-05 | 0.00041 |
| <i>Tnks2</i>         | 1.03 | 1.30E-05 | 0.00041 |
| <i>Psmb7</i>         | 0.91 | 1.30E-05 | 0.00041 |
| <i>Srgap1</i>        | 1.12 | 1.31E-05 | 0.00041 |
| <i>Snx33</i>         | 1.18 | 1.32E-05 | 0.00041 |
| <i>Nme1</i>          | 0.89 | 1.33E-05 | 0.00042 |
| <i>Eif2s2</i>        | 0.91 | 1.34E-05 | 0.00042 |
| <i>Rer1</i>          | 0.91 | 1.35E-05 | 0.00042 |
| <i>Fzd3</i>          | 1.11 | 1.36E-05 | 0.00042 |
| <i>2810428I15Rik</i> | 0.87 | 1.38E-05 | 0.00042 |
| <i>Ssr4</i>          | 0.88 | 1.37E-05 | 0.00042 |
| <i>Col6a1</i>        | 1.59 | 1.39E-05 | 0.00043 |
| <i>Thbd</i>          | 1.86 | 1.40E-05 | 0.00043 |
| <i>Herc1</i>         | 1.06 | 1.40E-05 | 0.00043 |
| <i>Opa3</i>          | 0.86 | 1.41E-05 | 0.00043 |
| <i>Chic1</i>         | 1.09 | 1.41E-05 | 0.00043 |
| <i>Rps19bp1</i>      | 0.90 | 1.42E-05 | 0.00043 |
| <i>Senp1</i>         | 1.05 | 1.46E-05 | 0.00044 |
| <i>Drq1</i>          | 0.94 | 1.46E-05 | 0.00044 |
| <i>Sacs</i>          | 1.18 | 1.47E-05 | 0.00044 |
| <i>Dpy30</i>         | 0.92 | 1.48E-05 | 0.00045 |
| <i>1810013L24Rik</i> | 1.09 | 1.50E-05 | 0.00045 |
| <i>Uqcrc2</i>        | 0.90 | 1.49E-05 | 0.00045 |

|                      |      |          |             |
|----------------------|------|----------|-------------|
| <i>2410004B18Rik</i> | 0.90 | 1.51E-05 | 0.00045     |
| <i>Rps15</i>         | 0.91 | 1.53E-05 | 0.00046     |
| <i>Mrps28</i>        | 0.81 | 1.59E-05 | 0.00047     |
| <i>Slc30a7</i>       | 1.06 | 1.59E-05 | 0.00047     |
| <i>Krtcap2</i>       | 0.92 | 1.62E-05 | 0.000479768 |
| <i>Crcp</i>          | 0.89 | 1.63E-05 | 0.000479768 |
| <i>Ppil1</i>         | 0.93 | 1.63E-05 | 0.000480039 |
| <i>Abca1</i>         | 1.14 | 1.63E-05 | 0.000480039 |
| <i>Rpl29</i>         | 0.95 | 1.64E-05 | 0.00048     |
| <i>Pfdn1</i>         | 0.89 | 1.64E-05 | 0.00048     |
| <i>Cct4</i>          | 0.89 | 1.65E-05 | 0.00048     |
| <i>Rgs2</i>          | 0.85 | 1.68E-05 | 0.00049     |
| <i>Akt1s1</i>        | 0.87 | 1.68E-05 | 0.00049     |
| <i>Luc7l2</i>        | 1.12 | 1.69E-05 | 0.00049     |
| <i>Scube3</i>        | 1.16 | 1.72E-05 | 0.00050     |
| <i>Hars</i>          | 0.89 | 1.73E-05 | 0.00050     |
| <i>Helz</i>          | 1.11 | 1.74E-05 | 0.00050     |
| <i>Dicer1</i>        | 1.08 | 1.74E-05 | 0.00050     |
| <i>Cp</i>            | 1.34 | 1.77E-05 | 0.00051     |
| <i>Ndufv1</i>        | 0.90 | 1.81E-05 | 0.00052     |
| <i>Ssc5d</i>         | 1.43 | 1.81E-05 | 0.00052     |
| <i>2310039H08Rik</i> | 0.82 | 1.81E-05 | 0.00052     |
| <i>Insig1</i>        | 0.83 | 1.82E-05 | 0.00052     |
| <i>Capza2</i>        | 0.91 | 1.86E-05 | 0.00053     |
| <i>Rplp1</i>         | 0.91 | 1.89E-05 | 0.00054     |
| <i>Sorbs1</i>        | 1.09 | 1.90E-05 | 0.00054     |
| <i>Ywhae</i>         | 0.93 | 1.99E-05 | 0.00056     |
| <i>Efr3a</i>         | 1.09 | 2.00E-05 | 0.00056     |
| <i>Zmat3</i>         | 1.04 | 2.02E-05 | 0.00057     |
| <i>Ndufaf2</i>       | 0.91 | 2.04E-05 | 0.00057     |
| <i>Ubr2</i>          | 1.07 | 2.04E-05 | 0.00057     |
| <i>Ubald1</i>        | 0.93 | 2.04E-05 | 0.00057     |
| <i>Slc44a5</i>       | 1.13 | 2.08E-05 | 0.00058     |
| <i>Tpgs1</i>         | 0.86 | 2.11E-05 | 0.00058     |
| <i>Ndufb10</i>       | 0.92 | 2.11E-05 | 0.00058     |
| <i>Faxc</i>          | 1.03 | 2.11E-05 | 0.00058     |
| <i>Cox4i1</i>        | 0.89 | 2.15E-05 | 0.00059     |
| <i>Dcx</i>           | 1.11 | 2.14E-05 | 0.00059     |
| <i>Zfp329</i>        | 1.08 | 2.16E-05 | 0.00059     |
| <i>Rpl37</i>         | 0.87 | 2.16E-05 | 0.00059     |
| <i>Fan1</i>          | 1.16 | 2.19E-05 | 0.000599611 |
| <i>Angptl2</i>       | 1.40 | 2.21E-05 | 0.00060     |
| <i>Psme1</i>         | 0.93 | 2.22E-05 | 0.00060     |
| <i>Cinp</i>          | 0.87 | 2.23E-05 | 0.00060     |
| <i>Nid1</i>          | 1.23 | 2.23E-05 | 0.00060     |
| <i>Dock3</i>         | 1.05 | 2.23E-05 | 0.00060     |
| <i>Glr5</i>          | 0.91 | 2.26E-05 | 0.000610266 |
| <i>Foxn3</i>         | 1.21 | 2.31E-05 | 0.00062     |
| <i>Crip2</i>         | 0.94 | 2.33E-05 | 0.00063     |

|                      |      |          |            |
|----------------------|------|----------|------------|
| <i>Etv4</i>          | 0.73 | 2.36E-05 | 0.00063    |
| <i>Zbtb10</i>        | 1.10 | 2.36E-05 | 0.00063    |
| <i>Kalrn</i>         | 1.05 | 2.38E-05 | 0.00063    |
| <i>Eif3b</i>         | 0.91 | 2.37E-05 | 0.00063    |
| <i>Arhgef12</i>      | 1.03 | 2.39E-05 | 0.00064    |
| <i>2900026A02Rik</i> | 1.13 | 2.40E-05 | 0.00064    |
| <i>Bysl</i>          | 0.83 | 2.43E-05 | 0.00064    |
| <i>Tomm6</i>         | 0.91 | 2.45E-05 | 0.00065    |
| <i>Ltbp3</i>         | 1.13 | 2.46E-05 | 0.00065    |
| <i>Slc25a38</i>      | 0.85 | 2.47E-05 | 0.00065    |
| <i>ldh1</i>          | 0.95 | 2.50E-05 | 0.00065    |
| <i>Sec11c</i>        | 0.88 | 2.49E-05 | 0.00065    |
| <i>Aars</i>          | 0.84 | 2.49E-05 | 0.00065    |
| <i>Micu1</i>         | 0.89 | 2.51E-05 | 0.00066    |
| <i>Tuba1c</i>        | 0.92 | 2.53E-05 | 0.00066    |
| <i>Slc13a3</i>       | 1.36 | 2.54E-05 | 0.00066    |
| <i>Asap3</i>         | 1.22 | 2.54E-05 | 0.00066    |
| <i>Aurkaip1</i>      | 0.90 | 2.62E-05 | 0.00068    |
| <i>Cmtm4</i>         | 1.02 | 2.62E-05 | 0.00068    |
| <i>Gpc6</i>          | 1.08 | 2.67E-05 | 0.00069    |
| <i>Fgfr2</i>         | 1.11 | 2.69E-05 | 0.00069    |
| <i>Itga11</i>        | 1.49 | 2.70E-05 | 0.00070    |
| <i>Use1</i>          | 0.89 | 2.76E-05 | 0.00071015 |
| <i>Lrp5</i>          | 1.11 | 2.79E-05 | 0.00071    |
| <i>Aifm3</i>         | 1.33 | 2.88E-05 | 0.00074    |
| <i>Grb10</i>         | 1.11 | 2.94E-05 | 0.00075    |
| <i>Spcs2</i>         | 0.90 | 2.94E-05 | 0.00075    |
| <i>Gadd45gip1</i>    | 0.87 | 2.94E-05 | 0.00075    |
| <i>Fndc3b</i>        | 1.12 | 3.00E-05 | 0.00076    |
| <i>Taldo1</i>        | 0.91 | 3.03E-05 | 0.00077    |
| <i>Dcps</i>          | 0.91 | 3.04E-05 | 0.00077    |
| <i>Cox7a2</i>        | 0.92 | 3.10E-05 | 0.00078    |
| <i>Pfdn4</i>         | 0.87 | 3.13E-05 | 0.00079    |
| <i>Erbp4</i>         | 1.19 | 3.15E-05 | 0.00079    |
| <i>Rpl8</i>          | 0.91 | 3.16E-05 | 0.00079    |
| <i>Psat1</i>         | 0.88 | 3.16E-05 | 0.00079    |
| <i>Med27</i>         | 0.91 | 3.16E-05 | 0.00079    |
| <i>Hipk2</i>         | 1.18 | 3.19E-05 | 0.00080    |
| <i>Zfp428</i>        | 0.93 | 3.20E-05 | 0.00080    |
| <i>Prmt1</i>         | 0.88 | 3.20E-05 | 0.00080    |
| <i>Mrps18a</i>       | 0.88 | 3.22E-05 | 0.00080    |
| <i>Mien1</i>         | 0.88 | 3.24E-05 | 0.00080    |
| <i>Edn3</i>          | 1.57 | 3.23E-05 | 0.00080    |
| <i>Macf1</i>         | 1.04 | 3.24E-05 | 0.00080    |
| <i>Samd8</i>         | 1.06 | 3.28E-05 | 0.00081    |
| <i>Scyl1</i>         | 0.92 | 3.31E-05 | 0.00081    |
| <i>Aamp</i>          | 0.90 | 3.35E-05 | 0.00082    |
| <i>Mrpl38</i>        | 0.92 | 3.35E-05 | 0.00082    |
| <i>Mvk</i>           | 0.79 | 3.33E-05 | 0.00082    |

|                      |      |          |             |
|----------------------|------|----------|-------------|
| <i>Vps4a</i>         | 0.94 | 3.34E-05 | 0.00082     |
| <i>Setd5</i>         | 1.06 | 3.37E-05 | 0.000819672 |
| <i>Mir331</i>        | 1.55 | 3.41E-05 | 0.00083     |
| <i>Tuba1a</i>        | 0.95 | 3.44E-05 | 0.00083     |
| <i>Rpl13a</i>        | 0.87 | 3.44E-05 | 0.00083     |
| <i>Apc</i>           | 1.07 | 3.50E-05 | 0.00085     |
| <i>Col11a1</i>       | 1.14 | 3.52E-05 | 0.00085     |
| <i>Luzp1</i>         | 1.03 | 3.53E-05 | 0.00085     |
| <i>Trappc3</i>       | 0.96 | 3.57E-05 | 0.00086     |
| <i>Htt</i>           | 1.00 | 3.57E-05 | 0.00086     |
| <i>Arf1</i>          | 0.94 | 3.61E-05 | 0.000860024 |
| <i>Elp5</i>          | 0.91 | 3.61E-05 | 0.000860024 |
| <i>Stip1</i>         | 0.90 | 3.61E-05 | 0.000860024 |
| <i>Cst3</i>          | 0.84 | 3.62E-05 | 0.000860024 |
| <i>Vps35</i>         | 0.91 | 3.60E-05 | 0.000860024 |
| <i>Cd109</i>         | 1.31 | 3.64E-05 | 0.00086     |
| <i>Zfp275</i>        | 1.03 | 3.66E-05 | 0.00087     |
| <i>Slc7a2</i>        | 1.13 | 3.66E-05 | 0.00087     |
| <i>Mageh1</i>        | 0.91 | 3.68E-05 | 0.00087     |
| <i>Hist3h2a</i>      | 0.90 | 3.73E-05 | 0.00088     |
| <i>Bgn</i>           | 1.33 | 3.75E-05 | 0.00088     |
| <i>Tgfb3</i>         | 1.48 | 3.79E-05 | 0.000890365 |
| <i>Ptpn14</i>        | 1.19 | 3.83E-05 | 0.00090     |
| <i>Wdr74</i>         | 0.90 | 3.85E-05 | 0.00090     |
| <i>Clta</i>          | 0.95 | 3.90E-05 | 0.00091     |
| <i>Actb</i>          | 0.94 | 3.90E-05 | 0.00091     |
| <i>Atxn1</i>         | 1.10 | 3.91E-05 | 0.00091     |
| <i>Itga2</i>         | 1.52 | 3.94E-05 | 0.00091     |
| <i>Mib1</i>          | 1.13 | 3.94E-05 | 0.00091     |
| <i>Lrp4</i>          | 1.08 | 3.97E-05 | 0.00092     |
| <i>Mid1ip1</i>       | 0.92 | 3.97E-05 | 0.00092     |
| <i>Ppfibp1</i>       | 1.14 | 4.08E-05 | 0.00094     |
| <i>Atp13a3</i>       | 1.08 | 4.11E-05 | 0.00094     |
| <i>Ptbp3</i>         | 1.11 | 4.11E-05 | 0.00094     |
| <i>Ksr2</i>          | 1.16 | 4.10E-05 | 0.00094     |
| <i>Rabgap1l</i>      | 1.09 | 4.16E-05 | 0.00095     |
| <i>0610010K14Rik</i> | 0.95 | 4.15E-05 | 0.00095     |
| <i>Lama1</i>         | 1.14 | 4.15E-05 | 0.00095     |
| <i>Alkbh6</i>        | 0.87 | 4.15E-05 | 0.00095     |
| <i>Adamts4</i>       | 1.23 | 4.19E-05 | 0.00095     |
| <i>Rbfox2</i>        | 1.08 | 4.19E-05 | 0.00095     |
| <i>St8sia1</i>       | 1.09 | 4.20E-05 | 0.00095     |
| <i>Babam1</i>        | 0.90 | 4.26E-05 | 0.00096     |
| <i>Gpn1</i>          | 0.88 | 4.29E-05 | 0.000969533 |
| <i>Mrpl27</i>        | 0.88 | 4.33E-05 | 0.000976504 |
| <i>Rcl1</i>          | 0.83 | 4.34E-05 | 0.00098     |
| <i>Mrps31</i>        | 0.86 | 4.36E-05 | 0.000980284 |
| <i>Flnc</i>          | 1.28 | 4.41E-05 | 0.00099     |
| <i>Elavl3</i>        | 1.05 | 4.47E-05 | 0.0010      |

|                 |      |          |        |
|-----------------|------|----------|--------|
| <i>Zdhhc21</i>  | 1.06 | 4.50E-05 | 0.0010 |
| <i>Kank2</i>    | 1.21 | 4.51E-05 | 0.0010 |
| <i>Ank3</i>     | 1.10 | 4.54E-05 | 0.0010 |
| <i>Glod4</i>    | 0.89 | 4.58E-05 | 0.0010 |
| <i>Col3a1</i>   | 1.80 | 4.59E-05 | 0.0010 |
| <i>Snrpd2</i>   | 0.91 | 4.74E-05 | 0.0011 |
| <i>Dnajc11</i>  | 0.92 | 4.81E-05 | 0.0011 |
| <i>Fsd1l</i>    | 1.12 | 4.85E-05 | 0.0011 |
| <i>Tuba1b</i>   | 0.94 | 4.88E-05 | 0.0011 |
| <i>Strbp</i>    | 0.98 | 4.90E-05 | 0.0011 |
| <i>Ptprd</i>    | 1.18 | 4.90E-05 | 0.0011 |
| <i>Pgls</i>     | 0.89 | 4.96E-05 | 0.0011 |
| <i>Lrp6</i>     | 1.11 | 4.99E-05 | 0.0011 |
| <i>Tmsb10</i>   | 0.92 | 5.05E-05 | 0.0011 |
| <i>Fbxl20</i>   | 1.06 | 5.10E-05 | 0.0011 |
| <i>Ftl1</i>     | 0.94 | 5.14E-05 | 0.0011 |
| <i>Nfic</i>     | 1.05 | 5.17E-05 | 0.0011 |
| <i>Rbms2</i>    | 1.09 | 5.18E-05 | 0.0011 |
| <i>Rnf38</i>    | 1.14 | 5.16E-05 | 0.0011 |
| <i>Atp6v1g1</i> | 0.96 | 5.16E-05 | 0.0011 |
| <i>Gm10653</i>  | 0.71 | 5.19E-05 | 0.0011 |
| <i>Arhgap31</i> | 1.07 | 5.24E-05 | 0.0011 |
| <i>Tmem126a</i> | 0.94 | 5.23E-05 | 0.0011 |
| <i>Aarsd1</i>   | 0.89 | 5.26E-05 | 0.0011 |
| <i>Atp6v1d</i>  | 0.94 | 5.28E-05 | 0.0011 |
| <i>Rrp7a</i>    | 0.88 | 5.28E-05 | 0.0011 |
| <i>Rheb</i>     | 0.91 | 5.30E-05 | 0.0011 |
| <i>Aacs</i>     | 0.84 | 5.29E-05 | 0.0011 |
| <i>Dtnbp1</i>   | 0.91 | 5.33E-05 | 0.0011 |
| <i>Tufm</i>     | 0.88 | 5.36E-05 | 0.0011 |
| <i>Armcx4</i>   | 1.07 | 5.38E-05 | 0.0011 |
| <i>Yeats4</i>   | 0.95 | 5.45E-05 | 0.0012 |
| <i>Pdgfrb</i>   | 1.13 | 5.46E-05 | 0.0012 |
| <i>Frem1</i>    | 1.25 | 5.48E-05 | 0.0012 |
| <i>Rbm19</i>    | 0.81 | 5.47E-05 | 0.0012 |
| <i>Rps24</i>    | 0.95 | 5.49E-05 | 0.0012 |
| <i>Txn14b</i>   | 0.81 | 5.51E-05 | 0.0012 |
| <i>Wars</i>     | 0.91 | 5.58E-05 | 0.0012 |
| <i>Rc3h2</i>    | 1.09 | 5.58E-05 | 0.0012 |
| <i>Scai</i>     | 1.15 | 5.59E-05 | 0.0012 |
| <i>Dctn5</i>    | 0.94 | 5.60E-05 | 0.0012 |
| <i>Eef1a1</i>   | 0.93 | 5.63E-05 | 0.0012 |
| <i>Hipk3</i>    | 1.04 | 5.66E-05 | 0.0012 |
| <i>Rps7</i>     | 0.89 | 5.74E-05 | 0.0012 |
| <i>Txndc12</i>  | 0.95 | 5.74E-05 | 0.0012 |
| <i>Miat</i>     | 1.31 | 5.73E-05 | 0.0012 |
| <i>Prelid1</i>  | 0.93 | 5.80E-05 | 0.0012 |
| <i>Chka</i>     | 1.16 | 5.86E-05 | 0.0012 |
| <i>RbmX2</i>    | 0.85 | 5.85E-05 | 0.0012 |



|                   |      |          |        |
|-------------------|------|----------|--------|
| <i>Rpl10</i>      | 0.96 | 5.88E-05 | 0.0012 |
| <i>Mical3</i>     | 1.05 | 5.91E-05 | 0.0012 |
| <i>Bola2</i>      | 0.89 | 5.94E-05 | 0.0012 |
| <i>Smg1</i>       | 1.07 | 5.97E-05 | 0.0012 |
| <i>Gpx1</i>       | 0.91 | 5.98E-05 | 0.0012 |
| <i>Wdr26</i>      | 1.05 | 6.02E-05 | 0.0012 |
| <i>Rrp1</i>       | 0.92 | 6.02E-05 | 0.0012 |
| <i>Snrrnp25</i>   | 0.83 | 6.05E-05 | 0.0012 |
| <i>Ap4s1</i>      | 0.90 | 6.08E-05 | 0.0012 |
| <i>Apopt1</i>     | 0.89 | 6.06E-05 | 0.0012 |
| <i>Nol12</i>      | 0.85 | 6.07E-05 | 0.0012 |
| <i>Edf1</i>       | 0.93 | 6.08E-05 | 0.0012 |
| <i>Akr1a1</i>     | 0.92 | 6.05E-05 | 0.0012 |
| <i>Scn8a</i>      | 1.03 | 6.14E-05 | 0.0012 |
| <i>Pgap1</i>      | 1.05 | 6.17E-05 | 0.0012 |
| <i>D10Jhu81e</i>  | 0.89 | 6.17E-05 | 0.0012 |
| <i>Cox7a2l</i>    | 0.92 | 6.18E-05 | 0.0012 |
| <i>Khdrbs2</i>    | 0.90 | 6.25E-05 | 0.0013 |
| <i>Dhcr24</i>     | 0.86 | 6.28E-05 | 0.0013 |
| <i>Fryl</i>       | 1.11 | 6.29E-05 | 0.0013 |
| <i>Sec24a</i>     | 1.08 | 6.33E-05 | 0.0013 |
| <i>Suclg1</i>     | 0.90 | 6.34E-05 | 0.0013 |
| <i>Nedd8</i>      | 0.95 | 6.37E-05 | 0.0013 |
| <i>Acsbg1</i>     | 0.75 | 6.41E-05 | 0.0013 |
| <i>Ovgp1</i>      | 1.33 | 6.48E-05 | 0.0013 |
| <i>Mrpl20</i>     | 0.91 | 6.48E-05 | 0.0013 |
| <i>Rdh14</i>      | 0.91 | 6.52E-05 | 0.0013 |
| <i>ldh3b</i>      | 0.91 | 6.54E-05 | 0.0013 |
| <i>Elof1</i>      | 0.93 | 6.54E-05 | 0.0013 |
| <i>Hn1l</i>       | 0.91 | 6.56E-05 | 0.0013 |
| <i>Tbx18</i>      | 1.60 | 6.72E-05 | 0.0013 |
| <i>Phlpp2</i>     | 1.00 | 6.77E-05 | 0.0013 |
| <i>Eef1d</i>      | 0.88 | 6.79E-05 | 0.0013 |
| <i>Mrpl52</i>     | 0.89 | 6.83E-05 | 0.0013 |
| <i>Bicc1</i>      | 1.40 | 6.96E-05 | 0.0014 |
| <i>Rps2</i>       | 0.84 | 6.95E-05 | 0.0014 |
| <i>Col4a3bp</i>   | 1.08 | 6.98E-05 | 0.0014 |
| <i>Kcng3</i>      | 1.53 | 7.03E-05 | 0.0014 |
| <i>Fbxo18</i>     | 0.91 | 7.13E-05 | 0.0014 |
| <i>Adamts12</i>   | 1.49 | 7.16E-05 | 0.0014 |
| <i>Lcmt1</i>      | 0.92 | 7.19E-05 | 0.0014 |
| <i>Sec24d</i>     | 1.11 | 7.28E-05 | 0.0014 |
| <i>Chmp3</i>      | 0.90 | 7.41E-05 | 0.0014 |
| <i>Bbx</i>        | 1.10 | 7.45E-05 | 0.0014 |
| <i>Tiam1</i>      | 1.03 | 7.44E-05 | 0.0014 |
| <i>Adcy6</i>      | 1.12 | 7.50E-05 | 0.0014 |
| <i>Wrn</i>        | 1.11 | 7.49E-05 | 0.0014 |
| <i>Cope</i>       | 0.93 | 7.49E-05 | 0.0014 |
| <i>D8Ertd738e</i> | 0.93 | 7.51E-05 | 0.0014 |

|                      |      |          |        |
|----------------------|------|----------|--------|
| <i>Herpud1</i>       | 0.87 | 7.49E-05 | 0.0014 |
| <i>Cxcl12</i>        | 1.17 | 7.59E-05 | 0.0015 |
| <i>Dcc</i>           | 1.14 | 7.66E-05 | 0.0015 |
| <i>1110051M20Rik</i> | 0.93 | 7.66E-05 | 0.0015 |
| <i>Mrpl40</i>        | 0.91 | 7.69E-05 | 0.0015 |
| <i>C330021F23Rik</i> | 0.88 | 7.69E-05 | 0.0015 |
| <i>Srp68</i>         | 0.91 | 7.71E-05 | 0.0015 |
| <i>Zfp369</i>        | 1.26 | 7.72E-05 | 0.0015 |
| <i>Myg1</i>          | 0.91 | 7.75E-05 | 0.0015 |
| <i>Dut</i>           | 0.84 | 7.74E-05 | 0.0015 |
| <i>Hspa9</i>         | 0.90 | 7.84E-05 | 0.0015 |
| <i>Prrc1</i>         | 1.07 | 7.84E-05 | 0.0015 |
| <i>Ufc1</i>          | 0.92 | 7.88E-05 | 0.0015 |
| <i>Mrps24</i>        | 0.84 | 7.91E-05 | 0.0015 |
| <i>Dtna</i>          | 1.16 | 7.91E-05 | 0.0015 |
| <i>Akap13</i>        | 0.98 | 7.89E-05 | 0.0015 |
| <i>Myo5a</i>         | 1.03 | 8.02E-05 | 0.0015 |
| <i>Rassf8</i>        | 1.25 | 8.08E-05 | 0.0015 |
| <i>Ppp1r8</i>        | 0.91 | 8.11E-05 | 0.0015 |
| <i>Pcyt2</i>         | 0.89 | 8.13E-05 | 0.0015 |
| <i>Cct8</i>          | 0.91 | 8.18E-05 | 0.0015 |
| <i>Rps21</i>         | 0.87 | 8.19E-05 | 0.0015 |
| <i>Rpl36al</i>       | 0.95 | 8.29E-05 | 0.0015 |
| <i>Slc35b1</i>       | 0.94 | 8.39E-05 | 0.0016 |
| <i>Mycbp2</i>        | 1.05 | 8.38E-05 | 0.0016 |
| <i>Zmiz1</i>         | 1.05 | 8.46E-05 | 0.0016 |
| <i>Loxl2</i>         | 1.22 | 8.59E-05 | 0.0016 |
| <i>Smarcd3</i>       | 0.92 | 8.58E-05 | 0.0016 |
| <i>Fdps</i>          | 0.86 | 8.61E-05 | 0.0016 |
| <i>Ssr2</i>          | 0.95 | 8.63E-05 | 0.0016 |
| <i>Lrrc18</i>        | 1.73 | 8.68E-05 | 0.0016 |
| <i>Antxr1</i>        | 1.13 | 8.71E-05 | 0.0016 |
| <i>Zbtb26</i>        | 1.09 | 8.87E-05 | 0.0016 |
| <i>Col27a1</i>       | 1.22 | 8.87E-05 | 0.0016 |
| <i>Isca2</i>         | 0.93 | 8.92E-05 | 0.0016 |
| <i>Man2a2</i>        | 1.02 | 8.91E-05 | 0.0016 |
| <i>Chac1</i>         | 0.63 | 9.10E-05 | 0.0017 |
| <i>Mgea5</i>         | 1.12 | 9.15E-05 | 0.0017 |
| <i>Lrig2</i>         | 1.06 | 9.17E-05 | 0.0017 |
| <i>Fam162a</i>       | 0.90 | 9.25E-05 | 0.0017 |
| <i>Rnf165</i>        | 1.08 | 9.35E-05 | 0.0017 |
| <i>Dcakd</i>         | 0.96 | 9.40E-05 | 0.0017 |
| <i>Rsph3a</i>        | 0.88 | 9.40E-05 | 0.0017 |
| <i>Trp73</i>         | 1.26 | 9.41E-05 | 0.0017 |
| <i>Tbc1d4</i>        | 1.10 | 9.48E-05 | 0.0017 |
| <i>Adamts9</i>       | 1.17 | 9.56E-05 | 0.0017 |
| <i>Ptges2</i>        | 0.84 | 9.63E-05 | 0.0017 |
| <i>P4ha2</i>         | 1.28 | 9.69E-05 | 0.0017 |
| <i>Slc8a1</i>        | 1.03 | 9.68E-05 | 0.0017 |

|                 |      |          |        |
|-----------------|------|----------|--------|
| <i>Plekhhg4</i> | 1.40 | 9.68E-05 | 0.0017 |
| <i>Mcts2</i>    | 0.89 | 9.80E-05 | 0.0017 |
| <i>Pnpla3</i>   | 1.17 | 9.84E-05 | 0.0018 |
| <i>Tubb4b</i>   | 0.88 | 9.83E-05 | 0.0018 |
| <i>Col23a1</i>  | 1.18 | 9.87E-05 | 0.0018 |
| <i>Klf12</i>    | 1.12 | 1.01E-04 | 0.0018 |
| <i>Fbxl17</i>   | 1.01 | 1.02E-04 | 0.0018 |
| <i>Dnajc30</i>  | 0.92 | 1.02E-04 | 0.0018 |
| <i>Cbr1</i>     | 0.97 | 1.02E-04 | 0.0018 |
| <i>Alx4</i>     | 1.62 | 1.02E-04 | 0.0018 |
| <i>Swsap1</i>   | 0.86 | 1.03E-04 | 0.0018 |
| <i>Cnot6l</i>   | 1.17 | 1.03E-04 | 0.0018 |
| <i>Rps5</i>     | 0.88 | 1.03E-04 | 0.0018 |
| <i>Itsn1</i>    | 0.98 | 1.05E-04 | 0.0018 |
| <i>Pram1</i>    | 1.49 | 1.05E-04 | 0.0018 |
| <i>Tet1</i>     | 1.00 | 1.05E-04 | 0.0018 |
| <i>Sptbn4</i>   | 1.05 | 1.06E-04 | 0.0019 |
| <i>Lonp2</i>    | 0.92 | 1.06E-04 | 0.0019 |
| <i>Podxl</i>    | 1.13 | 1.07E-04 | 0.0019 |
| <i>Cnpy2</i>    | 0.94 | 1.08E-04 | 0.0019 |
| <i>Bop1</i>     | 0.84 | 1.08E-04 | 0.0019 |
| <i>Csrnp3</i>   | 1.06 | 1.09E-04 | 0.0019 |
| <i>Sestd1</i>   | 1.05 | 1.09E-04 | 0.0019 |
| <i>Smad3</i>    | 1.13 | 1.09E-04 | 0.0019 |
| <i>Polr2m</i>   | 0.90 | 1.09E-04 | 0.0019 |
| <i>Noc2l</i>    | 0.89 | 1.09E-04 | 0.0019 |
| <i>Ogt</i>      | 1.22 | 1.10E-04 | 0.0019 |
| <i>Rasa12</i>   | 1.07 | 1.10E-04 | 0.0019 |
| <i>Cd163</i>    | 1.48 | 1.10E-04 | 0.0019 |
| <i>Pfkfb2</i>   | 1.06 | 1.11E-04 | 0.0019 |
| <i>Nov</i>      | 1.24 | 1.12E-04 | 0.0019 |
| <i>Shank2</i>   | 1.06 | 1.12E-04 | 0.0019 |
| <i>Cplx1</i>    | 0.85 | 1.14E-04 | 0.0019 |
| <i>Slc25a4</i>  | 0.93 | 1.14E-04 | 0.0020 |
| <i>Pycrl</i>    | 0.87 | 1.15E-04 | 0.0020 |
| <i>Emc4</i>     | 0.93 | 1.15E-04 | 0.0020 |
| <i>Synj2bp</i>  | 1.02 | 1.16E-04 | 0.0020 |
| <i>Srp9</i>     | 0.95 | 1.16E-04 | 0.0020 |
| <i>Ndufb5</i>   | 0.91 | 1.17E-04 | 0.0020 |
| <i>Cers6</i>    | 1.12 | 1.18E-04 | 0.0020 |
| <i>Ank2</i>     | 1.12 | 1.18E-04 | 0.0020 |
| <i>Ddx54</i>    | 0.86 | 1.19E-04 | 0.0020 |
| <i>March4</i>   | 1.08 | 1.20E-04 | 0.0020 |
| <i>Cacnb4</i>   | 1.06 | 1.20E-04 | 0.0020 |
| <i>Pou2f1</i>   | 1.06 | 1.21E-04 | 0.0020 |
| <i>Slc41a1</i>  | 1.13 | 1.22E-04 | 0.0021 |
| <i>Cox16</i>    | 0.84 | 1.22E-04 | 0.0021 |
| <i>Mrpl45</i>   | 0.86 | 1.24E-04 | 0.0021 |
| <i>Naa10</i>    | 0.89 | 1.25E-04 | 0.0021 |

|                      |      |          |        |
|----------------------|------|----------|--------|
| <i>Fez1</i>          | 0.96 | 1.25E-04 | 0.0021 |
| <i>Abi2</i>          | 1.05 | 1.26E-04 | 0.0021 |
| <i>Syn3</i>          | 1.07 | 1.27E-04 | 0.0021 |
| <i>Zfp366</i>        | 1.30 | 1.27E-04 | 0.0021 |
| <i>Alg13</i>         | 1.10 | 1.29E-04 | 0.0021 |
| <i>Rpl27a</i>        | 0.93 | 1.29E-04 | 0.0022 |
| <i>Rabif</i>         | 0.90 | 1.30E-04 | 0.0022 |
| <i>Rest</i>          | 1.19 | 1.29E-04 | 0.0022 |
| <i>Nf1</i>           | 1.02 | 1.32E-04 | 0.0022 |
| <i>Lmo2</i>          | 0.88 | 1.31E-04 | 0.0022 |
| <i>Nop10</i>         | 0.92 | 1.31E-04 | 0.0022 |
| <i>Rps3</i>          | 0.85 | 1.32E-04 | 0.0022 |
| <i>Pcolce</i>        | 1.46 | 1.32E-04 | 0.0022 |
| <i>Mpc2</i>          | 0.88 | 1.33E-04 | 0.0022 |
| <i>Rfx3</i>          | 1.13 | 1.35E-04 | 0.0022 |
| <i>Nit2</i>          | 0.87 | 1.36E-04 | 0.0022 |
| <i>Eif3i</i>         | 0.89 | 1.36E-04 | 0.0022 |
| <i>Sipa1l3</i>       | 1.02 | 1.36E-04 | 0.0022 |
| <i>Cab39l</i>        | 0.86 | 1.37E-04 | 0.0022 |
| <i>0610012G03Rik</i> | 0.89 | 1.37E-04 | 0.0022 |
| <i>Acot10</i>        | 0.90 | 1.38E-04 | 0.0023 |
| <i>Ccdc124</i>       | 0.93 | 1.38E-04 | 0.0023 |
| <i>1700020I14Rik</i> | 1.19 | 1.39E-04 | 0.0023 |
| <i>Ipo4</i>          | 0.89 | 1.39E-04 | 0.0023 |
| <i>Prex2</i>         | 1.05 | 1.40E-04 | 0.0023 |
| <i>Mff</i>           | 0.93 | 1.41E-04 | 0.0023 |
| <i>Cox10</i>         | 0.85 | 1.41E-04 | 0.0023 |
| <i>Dock6</i>         | 1.13 | 1.41E-04 | 0.0023 |
| <i>Anapc16</i>       | 0.93 | 1.41E-04 | 0.0023 |
| <i>Cd2ap</i>         | 1.23 | 1.41E-04 | 0.0023 |
| <i>Sobp</i>          | 1.07 | 1.42E-04 | 0.0023 |
| <i>Timm13</i>        | 0.86 | 1.42E-04 | 0.0023 |
| <i>Nans</i>          | 0.88 | 1.43E-04 | 0.0023 |
| <i>C1qbp</i>         | 0.94 | 1.43E-04 | 0.0023 |
| <i>Dbnl</i>          | 0.90 | 1.44E-04 | 0.0023 |
| <i>Amot</i>          | 1.08 | 1.44E-04 | 0.0023 |
| <i>Lancl1</i>        | 0.86 | 1.44E-04 | 0.0023 |
| <i>Atl3</i>          | 1.11 | 1.45E-04 | 0.0023 |
| <i>Cops3</i>         | 0.92 | 1.46E-04 | 0.0023 |
| <i>Idh3g</i>         | 0.95 | 1.47E-04 | 0.0023 |
| <i>Lamtor2</i>       | 0.95 | 1.47E-04 | 0.0023 |
| <i>Nelfe</i>         | 0.91 | 1.48E-04 | 0.0024 |
| <i>Tusc2</i>         | 0.90 | 1.48E-04 | 0.0024 |
| <i>Marveld1</i>      | 1.18 | 1.49E-04 | 0.0024 |
| <i>Ndufb6</i>        | 0.87 | 1.49E-04 | 0.0024 |
| <i>Kif21b</i>        | 1.03 | 1.50E-04 | 0.0024 |
| <i>March6</i>        | 1.05 | 1.51E-04 | 0.0024 |
| <i>Cep350</i>        | 1.04 | 1.52E-04 | 0.0024 |
| <i>Hecw1</i>         | 1.04 | 1.52E-04 | 0.0024 |

|                      |      |          |        |
|----------------------|------|----------|--------|
| <i>Mrpl46</i>        | 0.91 | 1.54E-04 | 0.0024 |
| <i>Rere</i>          | 1.08 | 1.55E-04 | 0.0024 |
| <i>Coq6</i>          | 0.83 | 1.55E-04 | 0.0024 |
| <i>D630045J12Rik</i> | 1.07 | 1.56E-04 | 0.0024 |
| <i>Prickle2</i>      | 1.04 | 1.56E-04 | 0.0024 |
| <i>Smurf2</i>        | 1.06 | 1.57E-04 | 0.0025 |
| <i>Psmc2</i>         | 0.92 | 1.59E-04 | 0.0025 |
| <i>Atp6v1e1</i>      | 0.94 | 1.60E-04 | 0.0025 |
| <i>Ncam1</i>         | 1.08 | 1.60E-04 | 0.0025 |
| <i>Myf2</i>          | 0.93 | 1.62E-04 | 0.0025 |
| <i>Kcnc2</i>         | 1.13 | 1.62E-04 | 0.0025 |
| <i>Adam19</i>        | 1.03 | 1.66E-04 | 0.0026 |
| <i>Tbc1d17</i>       | 0.89 | 1.66E-04 | 0.0026 |
| <i>Muc6</i>          | 1.40 | 1.66E-04 | 0.0026 |
| <i>Gcsh</i>          | 0.87 | 1.66E-04 | 0.0026 |
| <i>Slc5a3</i>        | 1.07 | 1.66E-04 | 0.0026 |
| <i>Kcnh7</i>         | 1.20 | 1.67E-04 | 0.0026 |
| <i>Pag1</i>          | 1.06 | 1.68E-04 | 0.0026 |
| <i>Fcho2</i>         | 1.14 | 1.68E-04 | 0.0026 |
| <i>Ubxn7</i>         | 1.02 | 1.69E-04 | 0.0026 |
| <i>Nsun7</i>         | 1.46 | 1.69E-04 | 0.0026 |
| <i>Eif5a</i>         | 0.91 | 1.70E-04 | 0.0026 |
| <i>Ngrn</i>          | 0.90 | 1.73E-04 | 0.0027 |
| <i>Marcks1</i>       | 0.97 | 1.73E-04 | 0.0027 |
| <i>Pitpnm2</i>       | 1.02 | 1.74E-04 | 0.0027 |
| <i>Tns1</i>          | 1.05 | 1.75E-04 | 0.0027 |
| <i>Immt</i>          | 0.89 | 1.75E-04 | 0.0027 |
| <i>Uaca</i>          | 1.14 | 1.77E-04 | 0.0027 |
| <i>Ankrd11</i>       | 1.05 | 1.77E-04 | 0.0027 |
| <i>Muc1</i>          | 1.42 | 1.80E-04 | 0.0027 |
| <i>Ap2m1</i>         | 0.90 | 1.80E-04 | 0.0027 |
| <i>Usp31</i>         | 1.01 | 1.80E-04 | 0.0027 |
| <i>Golgb1</i>        | 1.09 | 1.82E-04 | 0.0028 |
| <i>Nova2</i>         | 1.09 | 1.83E-04 | 0.0028 |
| <i>Bag1</i>          | 0.93 | 1.84E-04 | 0.0028 |
| <i>Polr2e</i>        | 0.92 | 1.84E-04 | 0.0028 |
| <i>Nipsnap1</i>      | 0.94 | 1.85E-04 | 0.0028 |
| <i>Rps10</i>         | 0.94 | 1.86E-04 | 0.0028 |
| <i>Eef1g</i>         | 0.91 | 1.86E-04 | 0.0028 |
| <i>Aldh1a2</i>       | 1.56 | 1.87E-04 | 0.0028 |
| <i>Mrps25</i>        | 0.78 | 1.87E-04 | 0.0028 |
| <i>Rps23</i>         | 0.92 | 1.88E-04 | 0.0028 |
| <i>Crabp1</i>        | 0.77 | 1.90E-04 | 0.0029 |
| <i>Sned1</i>         | 1.65 | 1.91E-04 | 0.0029 |
| <i>Abl2</i>          | 0.99 | 1.93E-04 | 0.0029 |
| <i>Myt1l</i>         | 1.06 | 1.94E-04 | 0.0029 |
| <i>Gca</i>           | 1.19 | 1.96E-04 | 0.0029 |
| <i>Syndig1</i>       | 0.81 | 1.96E-04 | 0.0029 |
| <i>Mecp2</i>         | 1.00 | 1.95E-04 | 0.0029 |

|                 |      |          |        |
|-----------------|------|----------|--------|
| <i>Ndufa8</i>   | 0.93 | 1.97E-04 | 0.0029 |
| <i>Ddx59</i>    | 0.85 | 1.98E-04 | 0.0029 |
| <i>Cd46</i>     | 1.62 | 1.99E-04 | 0.0030 |
| <i>Prdx5</i>    | 0.88 | 2.00E-04 | 0.0030 |
| <i>Col16a1</i>  | 1.29 | 2.00E-04 | 0.0030 |
| <i>Sae1</i>     | 0.93 | 1.99E-04 | 0.0030 |
| <i>Hspe1</i>    | 0.92 | 2.00E-04 | 0.0030 |
| <i>Prkce</i>    | 1.03 | 2.01E-04 | 0.0030 |
| <i>Itga1</i>    | 1.09 | 2.02E-04 | 0.0030 |
| <i>Tnr</i>      | 1.14 | 2.05E-04 | 0.0030 |
| <i>Stxbp4</i>   | 1.06 | 2.05E-04 | 0.0030 |
| <i>Mbnl2</i>    | 1.13 | 2.07E-04 | 0.0030 |
| <i>Qdpr</i>     | 0.87 | 2.07E-04 | 0.0030 |
| <i>Dmpk</i>     | 1.23 | 2.07E-04 | 0.0030 |
| <i>Agfg2</i>    | 0.81 | 2.08E-04 | 0.0030 |
| <i>Tmem8b</i>   | 1.11 | 2.12E-04 | 0.0031 |
| <i>Fh1</i>      | 0.88 | 2.13E-04 | 0.0031 |
| <i>Sgta</i>     | 0.93 | 2.13E-04 | 0.0031 |
| <i>Tbc1d9b</i>  | 0.89 | 2.13E-04 | 0.0031 |
| <i>Snrpd1</i>   | 0.94 | 2.13E-04 | 0.0031 |
| <i>Slc38a9</i>  | 1.04 | 2.14E-04 | 0.0031 |
| <i>Dad1</i>     | 0.86 | 2.18E-04 | 0.0032 |
| <i>Psmc10</i>   | 0.89 | 2.18E-04 | 0.0032 |
| <i>Trab2b</i>   | 1.59 | 2.19E-04 | 0.0032 |
| <i>Acadsb</i>   | 1.09 | 2.21E-04 | 0.0032 |
| <i>Vcpip1</i>   | 1.09 | 2.22E-04 | 0.0032 |
| <i>Rin3</i>     | 1.22 | 2.23E-04 | 0.0032 |
| <i>Vta1</i>     | 0.92 | 2.26E-04 | 0.0033 |
| <i>Evl</i>      | 0.91 | 2.28E-04 | 0.0033 |
| <i>Stab1</i>    | 1.32 | 2.27E-04 | 0.0033 |
| <i>Ndufa3</i>   | 0.91 | 2.28E-04 | 0.0033 |
| <i>Nenf</i>     | 0.92 | 2.29E-04 | 0.0033 |
| <i>Rims2</i>    | 1.09 | 2.29E-04 | 0.0033 |
| <i>Skap2</i>    | 0.68 | 2.29E-04 | 0.0033 |
| <i>Cdc42bpg</i> | 1.14 | 2.29E-04 | 0.0033 |
| <i>Nfatc2</i>   | 1.12 | 2.29E-04 | 0.0033 |
| <i>Bmp7</i>     | 1.31 | 2.30E-04 | 0.0033 |
| <i>Fam58b</i>   | 0.89 | 2.30E-04 | 0.0033 |
| <i>F13a1</i>    | 1.37 | 2.31E-04 | 0.0033 |
| <i>Mfsd7b</i>   | 1.07 | 2.32E-04 | 0.0033 |
| <i>BC004004</i> | 0.87 | 2.32E-04 | 0.0033 |
| <i>Sfmbt1</i>   | 1.02 | 2.33E-04 | 0.0033 |
| <i>Psmc2</i>    | 0.97 | 2.34E-04 | 0.0033 |
| <i>Bdh1</i>     | 0.90 | 2.37E-04 | 0.0034 |
| <i>Arhgdia</i>  | 0.88 | 2.38E-04 | 0.0034 |
| <i>Rps29</i>    | 0.88 | 2.38E-04 | 0.0034 |
| <i>Eml5</i>     | 1.17 | 2.38E-04 | 0.0034 |
| <i>Mtch1</i>    | 0.90 | 2.41E-04 | 0.0034 |
| <i>Pik3r1</i>   | 1.07 | 2.42E-04 | 0.0034 |

|                      |      |          |        |
|----------------------|------|----------|--------|
| <i>Cd248</i>         | 1.24 | 2.42E-04 | 0.0034 |
| <i>Nudc</i>          | 0.97 | 2.42E-04 | 0.0034 |
| <i>Rplp0</i>         | 0.91 | 2.45E-04 | 0.0034 |
| <i>Kdm2a</i>         | 1.05 | 2.45E-04 | 0.0034 |
| <i>Otud7b</i>        | 1.05 | 2.45E-04 | 0.0034 |
| <i>Gpatch4</i>       | 0.87 | 2.46E-04 | 0.0034 |
| <i>Phldb1</i>        | 1.06 | 2.47E-04 | 0.0035 |
| <i>Naa30</i>         | 1.07 | 2.48E-04 | 0.0035 |
| <i>9130401M01Rik</i> | 0.85 | 2.48E-04 | 0.0035 |
| <i>Ppp1r11</i>       | 0.92 | 2.51E-04 | 0.0035 |
| <i>Spen</i>          | 1.06 | 2.51E-04 | 0.0035 |
| <i>Epn1</i>          | 0.90 | 2.51E-04 | 0.0035 |
| <i>Mrps27</i>        | 0.84 | 2.53E-04 | 0.0035 |
| <i>Abcc9</i>         | 1.04 | 2.53E-04 | 0.0035 |
| <i>Lsm3</i>          | 0.94 | 2.55E-04 | 0.0035 |
| <i>Xrn1</i>          | 1.14 | 2.55E-04 | 0.0035 |
| <i>Eef2</i>          | 0.94 | 2.56E-04 | 0.0036 |
| <i>Fstl1</i>         | 1.19 | 2.57E-04 | 0.0036 |
| <i>4930481A15Rik</i> | 0.84 | 2.59E-04 | 0.0036 |
| <i>Eif3l</i>         | 0.95 | 2.60E-04 | 0.0036 |
| <i>Atp5j2</i>        | 0.84 | 2.62E-04 | 0.0036 |
| <i>Aak1</i>          | 0.96 | 2.64E-04 | 0.0036 |
| <i>Cd93</i>          | 1.11 | 2.67E-04 | 0.0037 |
| <i>Frem2</i>         | 1.08 | 2.67E-04 | 0.0037 |
| <i>Txnip</i>         | 1.19 | 2.66E-04 | 0.0037 |
| <i>Chd9</i>          | 1.04 | 2.67E-04 | 0.0037 |
| <i>Evi5</i>          | 1.11 | 2.74E-04 | 0.0038 |
| <i>Erp29</i>         | 0.95 | 2.75E-04 | 0.0038 |
| <i>Tmem183a</i>      | 0.91 | 2.78E-04 | 0.0038 |
| <i>Cacna1d</i>       | 1.11 | 2.79E-04 | 0.0038 |
| <i>Zbtb41</i>        | 1.03 | 2.80E-04 | 0.0038 |
| <i>Myl6</i>          | 0.91 | 2.81E-04 | 0.0038 |
| <i>Ptpro</i>         | 1.06 | 2.82E-04 | 0.0038 |
| <i>Ppm1e</i>         | 1.06 | 2.83E-04 | 0.0039 |
| <i>Eci1</i>          | 0.85 | 2.84E-04 | 0.0039 |
| <i>Sp140</i>         | 1.50 | 2.86E-04 | 0.0039 |
| <i>Cdc14b</i>        | 1.18 | 2.86E-04 | 0.0039 |
| <i>Nbea</i>          | 1.09 | 2.87E-04 | 0.0039 |
| <i>Tet3</i>          | 1.06 | 2.88E-04 | 0.0039 |
| <i>Ube2v1</i>        | 0.88 | 2.90E-04 | 0.0039 |
| <i>Mrps30</i>        | 0.92 | 2.91E-04 | 0.0039 |
| <i>Gps1</i>          | 0.89 | 2.93E-04 | 0.0040 |
| <i>Tmc7</i>          | 1.11 | 2.93E-04 | 0.0040 |
| <i>Braf</i>          | 1.06 | 2.94E-04 | 0.0040 |
| <i>Fam135b</i>       | 1.14 | 2.95E-04 | 0.0040 |
| <i>Lnpep</i>         | 1.14 | 2.96E-04 | 0.0040 |
| <i>Ccdc28b</i>       | 0.93 | 2.97E-04 | 0.0040 |
| <i>Etnk1</i>         | 1.10 | 2.98E-04 | 0.0040 |
| <i>Igdcc3</i>        | 1.14 | 2.98E-04 | 0.0040 |

|                      |      |          |        |
|----------------------|------|----------|--------|
| <i>Celsr3</i>        | 1.09 | 2.98E-04 | 0.0040 |
| <i>Got1</i>          | 0.85 | 2.99E-04 | 0.0040 |
| <i>Efemp1</i>        | 1.57 | 3.03E-04 | 0.0041 |
| <i>Vangl2</i>        | 1.12 | 3.04E-04 | 0.0041 |
| <i>Mrgprf</i>        | 1.73 | 3.07E-04 | 0.0041 |
| <i>Cwc15</i>         | 0.94 | 3.08E-04 | 0.0041 |
| <i>Gjb6</i>          | 1.52 | 3.08E-04 | 0.0041 |
| <i>Pcgf6</i>         | 1.18 | 3.11E-04 | 0.0041 |
| <i>Aldoc</i>         | 0.75 | 3.11E-04 | 0.0041 |
| <i>Cdh4</i>          | 1.06 | 3.16E-04 | 0.0042 |
| <i>Zeb1</i>          | 1.08 | 3.18E-04 | 0.0042 |
| <i>Eri3</i>          | 0.90 | 3.18E-04 | 0.0042 |
| <i>Cyc1</i>          | 0.86 | 3.20E-04 | 0.0042 |
| <i>1110004E09Rik</i> | 0.92 | 3.21E-04 | 0.0042 |
| <i>Lamtor4</i>       | 0.89 | 3.23E-04 | 0.0043 |
| <i>Lama2</i>         | 1.14 | 3.23E-04 | 0.0043 |
| <i>Map3k9</i>        | 1.01 | 3.25E-04 | 0.0043 |
| <i>Acr</i>           | 1.34 | 3.26E-04 | 0.0043 |
| <i>Ubl5</i>          | 0.93 | 3.27E-04 | 0.0043 |
| <i>Zbtb7a</i>        | 1.05 | 3.27E-04 | 0.0043 |
| <i>Pno1</i>          | 0.89 | 3.28E-04 | 0.0043 |
| <i>Tenm2</i>         | 1.13 | 3.28E-04 | 0.0043 |
| <i>Myo18a</i>        | 1.00 | 3.28E-04 | 0.0043 |
| <i>Pxn</i>           | 1.15 | 3.28E-04 | 0.0043 |
| <i>Postn</i>         | 1.38 | 3.29E-04 | 0.0043 |
| <i>N6amt1</i>        | 0.85 | 3.31E-04 | 0.0043 |
| <i>Tle2</i>          | 1.15 | 3.32E-04 | 0.0043 |
| <i>Zzef1</i>         | 1.01 | 3.33E-04 | 0.0043 |
| <i>Bach2</i>         | 1.15 | 3.35E-04 | 0.0044 |
| <i>Atp5k</i>         | 0.86 | 3.36E-04 | 0.0044 |
| <i>Pdzd7</i>         | 1.17 | 3.37E-04 | 0.0044 |
| <i>Kcnq1ot1</i>      | 1.18 | 3.40E-04 | 0.0044 |
| <i>Zdhhc20</i>       | 1.11 | 3.41E-04 | 0.0044 |
| <i>Nrp2</i>          | 1.07 | 3.45E-04 | 0.0045 |
| <i>Cby1</i>          | 0.96 | 3.45E-04 | 0.0045 |
| <i>Ybx1</i>          | 0.93 | 3.45E-04 | 0.0045 |
| <i>2210016L21Rik</i> | 0.93 | 3.45E-04 | 0.0045 |
| <i>Baz2a</i>         | 1.05 | 3.46E-04 | 0.0045 |
| <i>Maf</i>           | 1.18 | 3.47E-04 | 0.0045 |
| <i>Wnk4</i>          | 1.23 | 3.51E-04 | 0.0045 |
| <i>Abhd12</i>        | 0.88 | 3.55E-04 | 0.0046 |
| <i>Capzb</i>         | 0.92 | 3.55E-04 | 0.0046 |
| <i>Tgfbr2</i>        | 1.16 | 3.54E-04 | 0.0046 |
| <i>Gabrb2</i>        | 1.09 | 3.59E-04 | 0.0046 |
| <i>Magi3</i>         | 1.05 | 3.60E-04 | 0.0046 |
| <i>Mpdz</i>          | 1.05 | 3.60E-04 | 0.0046 |
| <i>9330159F19Rik</i> | 1.11 | 3.64E-04 | 0.0046 |
| <i>Celf5</i>         | 1.10 | 3.64E-04 | 0.0046 |
| <i>Zfp277</i>        | 0.84 | 3.64E-04 | 0.0046 |



|                      |      |          |        |
|----------------------|------|----------|--------|
| <i>Lonp1</i>         | 0.90 | 3.63E-04 | 0.0046 |
| <i>Hspbp1</i>        | 0.86 | 3.63E-04 | 0.0046 |
| <i>Fam199x</i>       | 1.05 | 3.62E-04 | 0.0046 |
| <i>Synpo</i>         | 1.10 | 3.71E-04 | 0.0047 |
| <i>4732471J01Rik</i> | 1.23 | 3.73E-04 | 0.0047 |
| <i>Exog</i>          | 0.88 | 3.72E-04 | 0.0047 |
| <i>Rpp40</i>         | 0.70 | 3.73E-04 | 0.0047 |
| <i>Ppa2</i>          | 0.88 | 3.74E-04 | 0.0047 |
| <i>Six5</i>          | 1.22 | 3.74E-04 | 0.0047 |
| <i>Cpd</i>           | 1.05 | 3.75E-04 | 0.0047 |
| <i>Plod1</i>         | 1.15 | 3.75E-04 | 0.0047 |
| <i>Atg3</i>          | 0.89 | 3.77E-04 | 0.0048 |
| <i>Cops8</i>         | 0.93 | 3.79E-04 | 0.0048 |
| <i>Mettl22</i>       | 0.88 | 3.79E-04 | 0.0048 |
| <i>Gja5</i>          | 1.43 | 3.79E-04 | 0.0048 |
| <i>Cldn19</i>        | 1.32 | 3.78E-04 | 0.0048 |
| <i>Minos1</i>        | 0.88 | 3.78E-04 | 0.0048 |
| <i>Snx17</i>         | 0.88 | 3.82E-04 | 0.0048 |
| <i>Gstm5</i>         | 0.91 | 3.83E-04 | 0.0048 |
| <i>Dda1</i>          | 0.91 | 3.84E-04 | 0.0048 |
| <i>Pank1</i>         | 0.83 | 3.85E-04 | 0.0048 |
| <i>Bpgm</i>          | 0.90 | 3.88E-04 | 0.0048 |
| <i>Rreb1</i>         | 1.12 | 3.90E-04 | 0.0049 |
| <i>4833422C13Rik</i> | 1.21 | 3.89E-04 | 0.0049 |
| <i>Pkd1</i>          | 0.98 | 3.90E-04 | 0.0049 |
| <i>Plagl2</i>        | 1.12 | 3.89E-04 | 0.0049 |
| <i>Gbp9</i>          | 1.40 | 3.91E-04 | 0.0049 |
| <i>Copz1</i>         | 0.91 | 3.94E-04 | 0.0049 |
| <i>Mgst3</i>         | 0.85 | 3.97E-04 | 0.0049 |
| <i>Grwd1</i>         | 0.83 | 3.98E-04 | 0.0049 |
| <i>Osbpl6</i>        | 1.03 | 4.00E-04 | 0.0050 |
| <i>Mars</i>          | 0.88 | 4.00E-04 | 0.0050 |
| <i>Txn1</i>          | 0.92 | 4.00E-04 | 0.0050 |
| <i>Golga4</i>        | 1.11 | 4.01E-04 | 0.0050 |
| <i>Atp5f1</i>        | 0.92 | 4.03E-04 | 0.0050 |
| <i>Anapc5</i>        | 0.92 | 4.03E-04 | 0.0050 |
| <i>Tmem143</i>       | 0.83 | 4.03E-04 | 0.0050 |
| <i>Qk</i>            | 1.03 | 4.06E-04 | 0.0050 |
| <i>Heph</i>          | 1.17 | 4.06E-04 | 0.0050 |
| <i>Atp6v1f</i>       | 0.90 | 4.06E-04 | 0.0050 |
| <i>Tjp1</i>          | 1.10 | 4.07E-04 | 0.0050 |
| <i>Arid1b</i>        | 0.98 | 4.11E-04 | 0.0050 |
| <i>Dmwd</i>          | 0.92 | 4.11E-04 | 0.0050 |
| <i>Aff4</i>          | 1.05 | 4.15E-04 | 0.0051 |
| <i>Pdp1</i>          | 0.91 | 4.15E-04 | 0.0051 |
| <i>Cetn2</i>         | 0.95 | 4.15E-04 | 0.0051 |
| <i>Dync1h1</i>       | 1.04 | 4.17E-04 | 0.0051 |
| <i>Tbc1d2b</i>       | 1.02 | 4.17E-04 | 0.0051 |
| <i>Atp5h</i>         | 0.92 | 4.19E-04 | 0.0051 |

|                      |      |          |        |
|----------------------|------|----------|--------|
| <i>Hspa8</i>         | 0.90 | 4.23E-04 | 0.0051 |
| <i>Lamb1</i>         | 1.15 | 4.24E-04 | 0.0052 |
| <i>Chrnbl</i>        | 1.40 | 4.28E-04 | 0.0052 |
| <i>Fth1</i>          | 0.93 | 4.30E-04 | 0.0052 |
| <i>Zfp36l2</i>       | 1.12 | 4.31E-04 | 0.0052 |
| <i>Ndufa7</i>        | 0.87 | 4.32E-04 | 0.0052 |
| <i>Ssna1</i>         | 0.91 | 4.32E-04 | 0.0052 |
| <i>Hddc2</i>         | 0.91 | 4.35E-04 | 0.0053 |
| <i>Bola1</i>         | 0.84 | 4.35E-04 | 0.0053 |
| <i>Apbb2</i>         | 1.04 | 4.39E-04 | 0.0053 |
| <i>Kat5</i>          | 0.92 | 4.41E-04 | 0.0053 |
| <i>Ppp2r1a</i>       | 0.91 | 4.42E-04 | 0.0053 |
| <i>D130040H23Rik</i> | 1.26 | 4.42E-04 | 0.0053 |
| <i>Dclk1</i>         | 0.98 | 4.43E-04 | 0.0053 |
| <i>Pik3r3</i>        | 1.06 | 4.44E-04 | 0.0053 |
| <i>Mpnd</i>          | 0.89 | 4.46E-04 | 0.0054 |
| <i>Slc24a5</i>       | 1.20 | 4.46E-04 | 0.0054 |
| <i>Cald1</i>         | 1.14 | 4.49E-04 | 0.0054 |
| <i>Rab5c</i>         | 0.94 | 4.50E-04 | 0.0054 |
| <i>Abcc1</i>         | 1.03 | 4.50E-04 | 0.0054 |
| <i>A2m</i>           | 1.23 | 4.51E-04 | 0.0054 |
| <i>Zfp654</i>        | 1.10 | 4.54E-04 | 0.0054 |
| <i>Sar1b</i>         | 0.93 | 4.57E-04 | 0.0054 |
| <i>Slc25a11</i>      | 0.88 | 4.56E-04 | 0.0054 |
| <i>Idi1</i>          | 0.83 | 4.57E-04 | 0.0054 |
| <i>Gabpb2</i>        | 1.11 | 4.57E-04 | 0.0054 |
| <i>Nr2c2</i>         | 1.01 | 4.56E-04 | 0.0054 |
| <i>Fat1</i>          | 1.08 | 4.55E-04 | 0.0054 |
| <i>Plagl1</i>        | 1.20 | 4.59E-04 | 0.0054 |
| <i>Adam9</i>         | 1.09 | 4.59E-04 | 0.0054 |
| <i>1110032A03Rik</i> | 0.87 | 4.59E-04 | 0.0054 |
| <i>Fkbp8</i>         | 0.89 | 4.61E-04 | 0.0055 |
| <i>Brd4</i>          | 1.06 | 4.62E-04 | 0.0055 |
| <i>Ston1</i>         | 1.24 | 4.64E-04 | 0.0055 |
| <i>Mpv17l2</i>       | 0.87 | 4.65E-04 | 0.0055 |
| <i>Pygo1</i>         | 1.16 | 4.66E-04 | 0.0055 |
| <i>Prmt2</i>         | 0.88 | 4.67E-04 | 0.0055 |
| <i>A330076H08Rik</i> | 1.42 | 4.71E-04 | 0.0055 |
| <i>Xkr4</i>          | 1.17 | 4.72E-04 | 0.0055 |
| <i>Aes</i>           | 0.92 | 4.72E-04 | 0.0055 |
| <i>Trim67</i>        | 1.02 | 4.71E-04 | 0.0055 |
| <i>Fzd7</i>          | 1.13 | 4.73E-04 | 0.0055 |
| <i>Trrap</i>         | 1.04 | 4.74E-04 | 0.0055 |
| <i>Chl1</i>          | 1.11 | 4.73E-04 | 0.0055 |
| <i>Dip2b</i>         | 1.04 | 4.76E-04 | 0.0056 |
| <i>Fnip2</i>         | 1.01 | 4.76E-04 | 0.0056 |
| <i>Arid2</i>         | 1.09 | 4.77E-04 | 0.0056 |
| <i>Uvssa</i>         | 1.15 | 4.78E-04 | 0.0056 |
| <i>Orc3</i>          | 1.04 | 4.78E-04 | 0.0056 |

|                      |      |          |        |
|----------------------|------|----------|--------|
| <i>Rsf1</i>          | 1.04 | 4.79E-04 | 0.0056 |
| <i>Dhtkd1</i>        | 1.19 | 4.81E-04 | 0.0056 |
| <i>Acvr2a</i>        | 1.05 | 4.83E-04 | 0.0056 |
| <i>Tspan18</i>       | 1.15 | 4.83E-04 | 0.0056 |
| <i>Ap2s1</i>         | 0.92 | 4.84E-04 | 0.0056 |
| <i>Megf8</i>         | 1.06 | 4.85E-04 | 0.0056 |
| <i>Mdh1</i>          | 0.88 | 4.86E-04 | 0.0056 |
| <i>Arhgap29</i>      | 1.23 | 4.86E-04 | 0.0056 |
| <i>Rpl4</i>          | 0.95 | 4.87E-04 | 0.0056 |
| <i>Mtss1</i>         | 1.07 | 4.90E-04 | 0.0057 |
| <i>Sppl2a</i>        | 1.06 | 4.92E-04 | 0.0057 |
| <i>Hibch</i>         | 0.83 | 4.93E-04 | 0.0057 |
| <i>Nudt15</i>        | 0.71 | 4.94E-04 | 0.0057 |
| <i>S1pr3</i>         | 1.08 | 4.96E-04 | 0.0057 |
| <i>Strip1</i>        | 0.89 | 4.96E-04 | 0.0057 |
| <i>Nudt2</i>         | 0.90 | 4.96E-04 | 0.0057 |
| <i>Eefsec</i>        | 0.87 | 4.96E-04 | 0.0057 |
| <i>Arl15</i>         | 1.08 | 5.04E-04 | 0.0058 |
| <i>Aco2</i>          | 0.91 | 5.03E-04 | 0.0058 |
| <i>Srgap2</i>        | 1.02 | 5.06E-04 | 0.0058 |
| <i>Psme4</i>         | 1.13 | 5.08E-04 | 0.0058 |
| <i>Tmem97</i>        | 0.84 | 5.11E-04 | 0.0058 |
| <i>Tmtc1</i>         | 1.09 | 5.11E-04 | 0.0058 |
| <i>Dgki</i>          | 1.10 | 5.15E-04 | 0.0059 |
| <i>Ash1l</i>         | 1.09 | 5.20E-04 | 0.0059 |
| <i>Higd2a</i>        | 0.95 | 5.23E-04 | 0.0060 |
| <i>Slc43a2</i>       | 1.08 | 5.23E-04 | 0.0060 |
| <i>Rbm15</i>         | 1.16 | 5.24E-04 | 0.0060 |
| <i>Fnbp4</i>         | 1.13 | 5.26E-04 | 0.0060 |
| <i>Stmn3</i>         | 0.91 | 5.28E-04 | 0.0060 |
| <i>Psmd5</i>         | 0.92 | 5.30E-04 | 0.0060 |
| <i>1110008F13Rik</i> | 0.95 | 5.30E-04 | 0.0060 |
| <i>Dcaf17</i>        | 1.03 | 5.36E-04 | 0.0061 |
| <i>Clasp1</i>        | 1.03 | 5.39E-04 | 0.0061 |
| <i>Arih1</i>         | 1.03 | 5.39E-04 | 0.0061 |
| <i>Ptp4a3</i>        | 0.85 | 5.41E-04 | 0.0061 |
| <i>Med13</i>         | 1.10 | 5.41E-04 | 0.0061 |
| <i>Xbp1</i>          | 0.88 | 5.44E-04 | 0.0061 |
| <i>Mkrn2</i>         | 0.89 | 5.45E-04 | 0.0061 |
| <i>Psmb10</i>        | 0.81 | 5.45E-04 | 0.0061 |
| <i>Cpsf4l</i>        | 1.38 | 5.47E-04 | 0.0062 |
| <i>Ydjc</i>          | 0.86 | 5.53E-04 | 0.0062 |
| <i>Ccdc38</i>        | 1.37 | 5.55E-04 | 0.0062 |
| <i>Pomp</i>          | 0.97 | 5.55E-04 | 0.0062 |
| <i>Ccser2</i>        | 1.02 | 5.62E-04 | 0.0063 |
| <i>Vps13c</i>        | 1.04 | 5.62E-04 | 0.0063 |
| <i>Rai1</i>          | 1.03 | 5.66E-04 | 0.0063 |
| <i>Fkbp10</i>        | 1.24 | 5.68E-04 | 0.0063 |
| <i>Sidt1</i>         | 1.24 | 5.67E-04 | 0.0063 |

|                      |      |          |        |
|----------------------|------|----------|--------|
| <i>Vav3</i>          | 1.11 | 5.67E-04 | 0.0063 |
| <i>Mrps17</i>        | 0.95 | 5.69E-04 | 0.0063 |
| <i>Commd1</i>        | 0.90 | 5.70E-04 | 0.0064 |
| <i>Rab8a</i>         | 0.93 | 5.71E-04 | 0.0064 |
| <i>Rpl36a</i>        | 0.89 | 5.74E-04 | 0.0064 |
| <i>Cpeb4</i>         | 1.14 | 5.78E-04 | 0.0064 |
| <i>Ptgfrn</i>        | 1.04 | 5.78E-04 | 0.0064 |
| <i>Dnaja2</i>        | 0.93 | 5.78E-04 | 0.0064 |
| <i>Daxx</i>          | 0.89 | 5.88E-04 | 0.0065 |
| <i>Marc2</i>         | 0.85 | 5.92E-04 | 0.0065 |
| <i>2010107E04Rik</i> | 0.91 | 5.92E-04 | 0.0065 |
| <i>Ranbp10</i>       | 1.06 | 5.92E-04 | 0.0065 |
| <i>Cep164</i>        | 1.10 | 5.92E-04 | 0.0065 |
| <i>Pdha1</i>         | 0.89 | 5.94E-04 | 0.0066 |
| <i>Actr1a</i>        | 0.92 | 5.96E-04 | 0.0066 |
| <i>Rnf6</i>          | 1.11 | 5.98E-04 | 0.0066 |
| <i>Xpo1</i>          | 1.10 | 5.99E-04 | 0.0066 |
| <i>Chchd4</i>        | 0.93 | 5.99E-04 | 0.0066 |
| <i>Plrg1</i>         | 0.91 | 6.00E-04 | 0.0066 |
| <i>Metrn</i>         | 0.82 | 6.01E-04 | 0.0066 |
| <i>Arl2</i>          | 0.89 | 6.03E-04 | 0.0066 |
| <i>Mdp1</i>          | 0.91 | 6.05E-04 | 0.0066 |
| <i>Piezo1</i>        | 1.08 | 6.10E-04 | 0.0067 |
| <i>Ap1s1</i>         | 0.90 | 6.10E-04 | 0.0067 |
| <i>Apaf1</i>         | 1.03 | 6.12E-04 | 0.0067 |
| <i>Ntmt1</i>         | 0.92 | 6.16E-04 | 0.0067 |
| <i>Heg1</i>          | 1.17 | 6.18E-04 | 0.0067 |
| <i>Rpl6</i>          | 0.93 | 6.19E-04 | 0.0068 |
| <i>Ankrd12</i>       | 1.09 | 6.25E-04 | 0.0068 |
| <i>Ran</i>           | 0.89 | 6.24E-04 | 0.0068 |
| <i>Skor1</i>         | 0.52 | 6.26E-04 | 0.0068 |
| <i>Aagab</i>         | 0.89 | 6.26E-04 | 0.0068 |
| <i>Anapc11</i>       | 0.82 | 6.27E-04 | 0.0068 |
| <i>Cog4</i>          | 0.87 | 6.27E-04 | 0.0068 |
| <i>Pbx1</i>          | 1.08 | 6.31E-04 | 0.0068 |
| <i>Frmd5</i>         | 1.15 | 6.32E-04 | 0.0068 |
| <i>Gm8773</i>        | 0.83 | 6.35E-04 | 0.0069 |
| <i>Ssh2</i>          | 1.02 | 6.37E-04 | 0.0069 |
| <i>Cflar</i>         | 1.04 | 6.39E-04 | 0.0069 |
| <i>Cyp4f17</i>       | 1.24 | 6.44E-04 | 0.0070 |
| <i>Triobp</i>        | 1.04 | 6.46E-04 | 0.0070 |
| <i>Cyp2d22</i>       | 1.35 | 6.46E-04 | 0.0070 |
| <i>Mrps18b</i>       | 0.89 | 6.50E-04 | 0.0070 |
| <i>2310009A05Rik</i> | 0.86 | 6.50E-04 | 0.0070 |
| <i>Plod2</i>         | 1.13 | 6.50E-04 | 0.0070 |
| <i>Net1</i>          | 1.12 | 6.52E-04 | 0.0070 |
| <i>Polr2f</i>        | 0.91 | 6.54E-04 | 0.0070 |
| <i>Timmdc1</i>       | 0.89 | 6.54E-04 | 0.0070 |
| <i>Setx</i>          | 1.06 | 6.54E-04 | 0.0070 |

|                      |      |          |        |
|----------------------|------|----------|--------|
| <i>Zfp697</i>        | 1.06 | 6.54E-04 | 0.0070 |
| <i>Lsm6</i>          | 0.86 | 6.53E-04 | 0.0070 |
| <i>Slc22a6</i>       | 1.76 | 6.56E-04 | 0.0070 |
| <i>Uvrug</i>         | 0.89 | 6.58E-04 | 0.0070 |
| <i>Tma7</i>          | 0.93 | 6.58E-04 | 0.0070 |
| <i>Slc4a8</i>        | 1.04 | 6.60E-04 | 0.0070 |
| <i>Pop5</i>          | 0.90 | 6.62E-04 | 0.0071 |
| <i>Slc6a8</i>        | 1.10 | 6.66E-04 | 0.0071 |
| <i>Ndufs7</i>        | 0.90 | 6.68E-04 | 0.0071 |
| <i>Cacna1h</i>       | 1.05 | 6.72E-04 | 0.0071 |
| <i>Nbeal1</i>        | 1.11 | 6.73E-04 | 0.0072 |
| <i>Stox2</i>         | 1.01 | 6.76E-04 | 0.0072 |
| <i>Eif2ak2</i>       | 1.20 | 6.78E-04 | 0.0072 |
| <i>1110004F10Rik</i> | 0.97 | 6.78E-04 | 0.0072 |
| <i>Ggh</i>           | 0.87 | 6.79E-04 | 0.0072 |
| <i>Rbm47</i>         | 1.30 | 6.80E-04 | 0.0072 |
| <i>Slc35g1</i>       | 1.25 | 6.81E-04 | 0.0072 |
| <i>Hmbbox1</i>       | 1.15 | 6.84E-04 | 0.0072 |
| <i>Dctpp1</i>        | 0.88 | 6.85E-04 | 0.0072 |
| <i>Ttc27</i>         | 0.83 | 6.87E-04 | 0.0072 |
| <i>Zfp827</i>        | 1.05 | 6.87E-04 | 0.0072 |
| <i>Zfp445</i>        | 1.09 | 6.87E-04 | 0.0072 |
| <i>Reck</i>          | 1.17 | 6.94E-04 | 0.0073 |
| <i>Klf4</i>          | 1.14 | 6.95E-04 | 0.0073 |
| <i>Lap3</i>          | 0.87 | 6.99E-04 | 0.0073 |
| <i>Rhot1</i>         | 0.89 | 7.02E-04 | 0.0074 |
| <i>Slc26a2</i>       | 1.14 | 7.08E-04 | 0.0074 |
| <i>Cped1</i>         | 1.46 | 7.08E-04 | 0.0074 |
| <i>Nudt14</i>        | 0.87 | 7.09E-04 | 0.0074 |
| <i>Tcf7l1</i>        | 1.13 | 7.09E-04 | 0.0074 |
| <i>Fis1</i>          | 0.90 | 7.11E-04 | 0.0074 |
| <i>Atp6v1h</i>       | 0.93 | 7.13E-04 | 0.0074 |
| <i>Scand1</i>        | 0.91 | 7.14E-04 | 0.0074 |
| <i>Gm10548</i>       | 0.71 | 7.17E-04 | 0.0075 |
| <i>Rab30</i>         | 1.26 | 7.22E-04 | 0.0075 |
| <i>Baz2b</i>         | 1.10 | 7.24E-04 | 0.0075 |
| <i>Foxl2os</i>       | 1.51 | 7.24E-04 | 0.0075 |
| <i>Tenm3</i>         | 1.09 | 7.28E-04 | 0.0076 |
| <i>Atp5g1</i>        | 0.87 | 7.33E-04 | 0.0076 |
| <i>Lats1</i>         | 1.04 | 7.34E-04 | 0.0076 |
| <i>Med19</i>         | 0.91 | 7.34E-04 | 0.0076 |
| <i>Thoc6</i>         | 0.85 | 7.35E-04 | 0.0076 |
| <i>Bace1</i>         | 1.05 | 7.39E-04 | 0.0077 |
| <i>Pitpnc1</i>       | 1.04 | 7.46E-04 | 0.0077 |
| <i>Fry</i>           | 1.05 | 7.50E-04 | 0.0078 |
| <i>Klhdc9</i>        | 0.90 | 7.53E-04 | 0.0078 |
| <i>Slc16a12</i>      | 1.25 | 7.52E-04 | 0.0078 |
| <i>Ldhb</i>          | 0.94 | 7.53E-04 | 0.0078 |
| <i>Nap1l4</i>        | 0.90 | 7.53E-04 | 0.0078 |

|                      |      |          |        |
|----------------------|------|----------|--------|
| <i>Myo9a</i>         | 1.02 | 7.51E-04 | 0.0078 |
| <i>Rab35</i>         | 0.96 | 7.56E-04 | 0.0078 |
| <i>Senp5</i>         | 1.01 | 7.57E-04 | 0.0078 |
| <i>Cdc37</i>         | 0.90 | 7.58E-04 | 0.0078 |
| <i>Arid1a</i>        | 1.05 | 7.62E-04 | 0.0078 |
| <i>6330403K07Rik</i> | 0.94 | 7.62E-04 | 0.0078 |
| <i>Ero1l</i>         | 1.12 | 7.64E-04 | 0.0078 |
| <i>Slc22a15</i>      | 1.02 | 7.64E-04 | 0.0078 |
| <i>Ddx28</i>         | 0.89 | 7.64E-04 | 0.0078 |
| <i>Cep97</i>         | 1.10 | 7.67E-04 | 0.0078 |
| <i>Mcee</i>          | 0.87 | 7.67E-04 | 0.0078 |
| <i>Bsg</i>           | 0.91 | 7.69E-04 | 0.0078 |
| <i>Lyve1</i>         | 1.45 | 7.69E-04 | 0.0078 |
| <i>Mrps11</i>        | 0.92 | 7.71E-04 | 0.0079 |
| <i>Brf2</i>          | 0.90 | 7.70E-04 | 0.0079 |
| <i>Rccd1</i>         | 1.13 | 7.72E-04 | 0.0079 |
| <i>Amacr</i>         | 0.78 | 7.75E-04 | 0.0079 |
| <i>Gm5148</i>        | 0.92 | 7.78E-04 | 0.0079 |
| <i>Bbip1</i>         | 0.92 | 7.80E-04 | 0.0079 |
| <i>Onecut2</i>       | 1.05 | 7.81E-04 | 0.0079 |
| <i>Ppie</i>          | 0.86 | 7.81E-04 | 0.0079 |
| <i>Gpx4</i>          | 0.88 | 7.82E-04 | 0.0079 |
| <i>Sssca1</i>        | 0.91 | 7.83E-04 | 0.0079 |
| <i>Dyrk3</i>         | 0.89 | 7.86E-04 | 0.0080 |
| <i>Adamts18</i>      | 1.11 | 7.87E-04 | 0.0080 |
| <i>Wdr48</i>         | 0.91 | 7.88E-04 | 0.0080 |
| <i>Gtf3c6</i>        | 0.95 | 7.89E-04 | 0.0080 |
| <i>Chmp6</i>         | 0.89 | 7.90E-04 | 0.0080 |
| <i>Zmynd19</i>       | 0.95 | 7.91E-04 | 0.0080 |
| <i>Snrnp27</i>       | 0.96 | 7.92E-04 | 0.0080 |
| <i>Lrrc59</i>        | 0.94 | 7.96E-04 | 0.0080 |
| <i>Rgs9</i>          | 1.11 | 7.94E-04 | 0.0080 |
| <i>Itgb1bp1</i>      | 0.87 | 7.97E-04 | 0.0080 |
| <i>Actc1</i>         | 0.77 | 7.97E-04 | 0.0080 |
| <i>Fkbp1a</i>        | 0.97 | 7.97E-04 | 0.0080 |
| <i>Ppm1g</i>         | 0.93 | 7.97E-04 | 0.0080 |
| <i>Ttc9b</i>         | 0.88 | 7.96E-04 | 0.0080 |
| <i>N4bp1</i>         | 1.03 | 7.99E-04 | 0.0080 |
| <i>Ubr3</i>          | 1.05 | 8.03E-04 | 0.0080 |
| <i>Tmem132b</i>      | 1.01 | 8.06E-04 | 0.0081 |
| <i>2610301B20Rik</i> | 0.92 | 8.09E-04 | 0.0081 |
| <i>Btbd2</i>         | 0.89 | 8.11E-04 | 0.0081 |
| <i>Nrcam</i>         | 1.07 | 8.12E-04 | 0.0081 |
| <i>Mrpl19</i>        | 0.83 | 8.13E-04 | 0.0081 |
| <i>Marveld3</i>      | 1.36 | 8.13E-04 | 0.0081 |
| <i>Gid8</i>          | 0.93 | 8.14E-04 | 0.0081 |
| <i>Mtmr12</i>        | 1.09 | 8.15E-04 | 0.0081 |
| <i>Hic1</i>          | 1.23 | 8.19E-04 | 0.0081 |
| <i>Tcp11l1</i>       | 1.12 | 8.20E-04 | 0.0081 |

|                      |      |          |        |
|----------------------|------|----------|--------|
| <i>Acvr1c</i>        | 1.22 | 8.21E-04 | 0.0081 |
| <i>Snapc2</i>        | 0.89 | 8.23E-04 | 0.0082 |
| <i>Sec22a</i>        | 0.84 | 8.24E-04 | 0.0082 |
| <i>Farsa</i>         | 0.91 | 8.25E-04 | 0.0082 |
| <i>Lrp8</i>          | 1.06 | 8.26E-04 | 0.0082 |
| <i>Cisd1</i>         | 0.91 | 8.32E-04 | 0.0082 |
| <i>Zfp622</i>        | 0.88 | 8.34E-04 | 0.0082 |
| <i>Arl5b</i>         | 1.11 | 8.45E-04 | 0.0083 |
| <i>Tmem160</i>       | 0.84 | 8.44E-04 | 0.0083 |
| <i>Cgnl1</i>         | 1.11 | 8.46E-04 | 0.0083 |
| <i>Kcnu1</i>         | 0.76 | 8.53E-04 | 0.0084 |
| <i>Clasp2</i>        | 1.05 | 8.59E-04 | 0.0085 |
| <i>4933439C10Rik</i> | 1.27 | 8.60E-04 | 0.0085 |
| <i>Osr1</i>          | 1.54 | 8.61E-04 | 0.0085 |
| <i>Hivep2</i>        | 1.07 | 8.64E-04 | 0.0085 |
| <i>Rwdd2b</i>        | 0.86 | 8.64E-04 | 0.0085 |
| <i>D930016D06Rik</i> | 1.16 | 8.63E-04 | 0.0085 |
| <i>Trappc4</i>       | 0.90 | 8.63E-04 | 0.0085 |
| <i>Cnnm4</i>         | 1.07 | 8.66E-04 | 0.0085 |
| <i>Pde5a</i>         | 1.12 | 8.65E-04 | 0.0085 |
| <i>Gcat</i>          | 0.71 | 8.67E-04 | 0.0085 |
| <i>Gpr180</i>        | 0.85 | 8.69E-04 | 0.0085 |
| <i>Tagln3</i>        | 0.95 | 8.69E-04 | 0.0085 |
| <i>Wnk3</i>          | 1.02 | 8.68E-04 | 0.0085 |
| <i>Aebp2</i>         | 1.01 | 8.70E-04 | 0.0085 |
| <i>Btbd3</i>         | 1.08 | 8.72E-04 | 0.0085 |
| <i>Dsp</i>           | 1.26 | 8.75E-04 | 0.0085 |
| <i>Nipsnap3b</i>     | 0.92 | 8.79E-04 | 0.0085 |
| <i>Rps16</i>         | 0.90 | 8.81E-04 | 0.0086 |
| <i>Psmc1</i>         | 0.93 | 8.82E-04 | 0.0086 |
| <i>Mpzl2</i>         | 1.66 | 8.86E-04 | 0.0086 |
| <i>Dhcr7</i>         | 0.88 | 8.87E-04 | 0.0086 |
| <i>Tango2</i>        | 0.88 | 8.90E-04 | 0.0086 |
| <i>Rps20</i>         | 0.94 | 8.93E-04 | 0.0086 |
| <i>Klhl34</i>        | 1.22 | 8.97E-04 | 0.0087 |
| <i>Nudt16l1</i>      | 0.92 | 8.98E-04 | 0.0087 |
| <i>Lrrc73</i>        | 0.85 | 9.07E-04 | 0.0088 |
| <i>Cfdp1</i>         | 0.95 | 9.09E-04 | 0.0088 |
| <i>Cubn</i>          | 1.13 | 9.15E-04 | 0.0088 |
| <i>Abcb8</i>         | 0.83 | 9.18E-04 | 0.0088 |
| <i>Camsap2</i>       | 1.03 | 9.21E-04 | 0.0089 |
| <i>Akap11</i>        | 1.03 | 9.21E-04 | 0.0089 |
| <i>Mdm4</i>          | 1.20 | 9.22E-04 | 0.0089 |
| <i>Ntpcr</i>         | 0.86 | 9.24E-04 | 0.0089 |
| <i>Wrb</i>           | 0.89 | 9.27E-04 | 0.0089 |
| <i>Afap1</i>         | 1.04 | 9.28E-04 | 0.0089 |
| <i>Ptpn13</i>        | 1.06 | 9.28E-04 | 0.0089 |
| <i>Eid1</i>          | 0.93 | 9.30E-04 | 0.0089 |
| <i>Schip1</i>        | 0.80 | 9.30E-04 | 0.0089 |

|                      |      |          |        |
|----------------------|------|----------|--------|
| <i>Auts2</i>         | 1.12 | 9.30E-04 | 0.0089 |
| <i>Snf8</i>          | 0.93 | 9.31E-04 | 0.0089 |
| <i>Klhdc2</i>        | 0.96 | 9.32E-04 | 0.0089 |
| <i>Kirrel</i>        | 1.07 | 9.38E-04 | 0.0090 |
| <i>Ankrd17</i>       | 1.02 | 9.40E-04 | 0.0090 |
| <i>Mbnl3</i>         | 1.24 | 9.42E-04 | 0.0090 |
| <i>Atp1a2</i>        | 1.15 | 9.47E-04 | 0.0090 |
| <i>Anapc13</i>       | 0.92 | 9.53E-04 | 0.0091 |
| <i>Rps17</i>         | 0.92 | 9.63E-04 | 0.0092 |
| <i>Stk25</i>         | 0.89 | 9.67E-04 | 0.0092 |
| <i>Snupn</i>         | 0.90 | 9.67E-04 | 0.0092 |
| <i>Setd7</i>         | 1.12 | 9.69E-04 | 0.0092 |
| <i>Mbd6</i>          | 1.18 | 9.71E-04 | 0.0092 |
| <i>Lama4</i>         | 1.07 | 9.74E-04 | 0.0092 |
| <i>Ubxn6</i>         | 0.93 | 9.80E-04 | 0.0093 |
| <i>Atp7a</i>         | 1.10 | 9.87E-04 | 0.0093 |
| <i>Sucla2</i>        | 0.89 | 9.89E-04 | 0.0094 |
| <i>Mrpl37</i>        | 0.91 | 9.92E-04 | 0.0094 |
| <i>Rnf150</i>        | 1.00 | 9.92E-04 | 0.0094 |
| <i>Itpril2</i>       | 1.13 | 9.99E-04 | 0.0094 |
| <i>Hyal1</i>         | 1.32 | 9.99E-04 | 0.0094 |
| <i>H2-Ke6</i>        | 0.93 | 1.01E-03 | 0.0095 |
| <i>Cox5a</i>         | 0.91 | 1.01E-03 | 0.0095 |
| <i>Kcnk2</i>         | 1.05 | 1.01E-03 | 0.0095 |
| <i>Slc9a5</i>        | 1.07 | 1.01E-03 | 0.0095 |
| <i>0610009B22Rik</i> | 0.94 | 1.02E-03 | 0.0096 |
| <i>Tmtc3</i>         | 1.09 | 1.02E-03 | 0.0096 |
| <i>Tmem222</i>       | 0.89 | 1.02E-03 | 0.0096 |
| <i>Lrp11</i>         | 0.90 | 1.03E-03 | 0.0096 |
| <i>Gls</i>           | 1.09 | 1.03E-03 | 0.0096 |
| <i>Mob4</i>          | 0.92 | 1.03E-03 | 0.0096 |
| <i>AW209491</i>      | 0.89 | 1.03E-03 | 0.0096 |
| <i>Olfml1</i>        | 1.36 | 1.03E-03 | 0.0096 |
| <i>Haus7</i>         | 0.91 | 1.03E-03 | 0.0096 |
| <i>Tbc1d8</i>        | 1.06 | 1.03E-03 | 0.0096 |
| <i>Zfp174</i>        | 1.03 | 1.03E-03 | 0.0096 |
| <i>Cdk12</i>         | 1.07 | 1.04E-03 | 0.0096 |
| <i>Sdf2l1</i>        | 0.84 | 1.04E-03 | 0.0097 |
| <i>Lrrc7</i>         | 1.13 | 1.04E-03 | 0.0097 |
| <i>Mrps34</i>        | 0.96 | 1.04E-03 | 0.0097 |
| <i>Oscp1</i>         | 0.88 | 1.05E-03 | 0.0097 |
| <i>Nedd4l</i>        | 1.05 | 1.05E-03 | 0.0097 |
| <i>Sra1</i>          | 0.94 | 1.05E-03 | 0.0097 |
| <i>Gtf2a1</i>        | 1.07 | 1.05E-03 | 0.0098 |
| <i>Gdpd5</i>         | 1.13 | 1.05E-03 | 0.0098 |
| <i>Zfp142</i>        | 1.02 | 1.05E-03 | 0.0098 |
| <i>Apod</i>          | 1.34 | 1.06E-03 | 0.0098 |
| <i>Vps51</i>         | 0.87 | 1.06E-03 | 0.0098 |
| <i>Tnrc6a</i>        | 1.05 | 1.06E-03 | 0.0098 |



|                      |      |          |        |
|----------------------|------|----------|--------|
| <i>Pbxip1</i>        | 1.12 | 1.06E-03 | 0.0098 |
| <i>Tmem245</i>       | 1.06 | 1.06E-03 | 0.0098 |
| <i>Maml3</i>         | 1.06 | 1.06E-03 | 0.0098 |
| <i>Taf10</i>         | 0.90 | 1.06E-03 | 0.0098 |
| <i>Pkig</i>          | 0.93 | 1.06E-03 | 0.0098 |
| <i>Cript</i>         | 0.96 | 1.07E-03 | 0.0098 |
| <i>Notch2</i>        | 1.11 | 1.07E-03 | 0.0098 |
| <i>Bmpr2</i>         | 1.17 | 1.07E-03 | 0.0098 |
| <i>Igdcc4</i>        | 1.02 | 1.07E-03 | 0.0098 |
| <i>Pgs1</i>          | 0.84 | 1.08E-03 | 0.0099 |
| <i>Klhdc7a</i>       | 1.37 | 1.08E-03 | 0.0099 |
| <i>Hddc3</i>         | 0.88 | 1.08E-03 | 0.0099 |
| <i>Dpp4</i>          | 1.28 | 1.08E-03 | 0.0099 |
| <i>Elac1</i>         | 1.10 | 1.08E-03 | 0.0099 |
| <i>4933417G07Rik</i> | 0.89 | 1.08E-03 | 0.0099 |
| <i>Ddx39b</i>        | 0.94 | 1.08E-03 | 0.0099 |
| <i>BC030336</i>      | 1.05 | 1.08E-03 | 0.0099 |
| <i>Lsm1</i>          | 0.84 | 1.09E-03 | 0.0099 |
| <i>Slco5a1</i>       | 1.14 | 1.09E-03 | 0.0099 |
| <i>Tfcp2l1</i>       | 1.18 | 1.09E-03 | 0.0099 |
| <i>Itpr3</i>         | 1.22 | 1.09E-03 | 0.010  |
| <i>Mrpl10</i>        | 0.91 | 1.10E-03 | 0.010  |
| <i>Chd7</i>          | 1.06 | 1.10E-03 | 0.010  |
| <i>Tbc1d24</i>       | 1.03 | 1.10E-03 | 0.010  |
| <i>Thyn1</i>         | 0.91 | 1.10E-03 | 0.010  |
| <i>Echs1</i>         | 0.88 | 1.11E-03 | 0.010  |
| <i>Myh10</i>         | 1.05 | 1.12E-03 | 0.010  |
| <i>Prr14l</i>        | 1.04 | 1.12E-03 | 0.010  |
| <i>Dync2h1</i>       | 1.03 | 1.12E-03 | 0.010  |
| <i>Rpl31</i>         | 0.89 | 1.13E-03 | 0.010  |
| <i>Elk4</i>          | 1.18 | 1.14E-03 | 0.010  |
| <i>Uap1</i>          | 0.89 | 1.14E-03 | 0.010  |
| <i>Thg1l</i>         | 0.87 | 1.14E-03 | 0.010  |
| <i>Med9</i>          | 0.87 | 1.13E-03 | 0.010  |
| <i>Get4</i>          | 0.87 | 1.14E-03 | 0.010  |
| <i>Zfp449</i>        | 1.11 | 1.14E-03 | 0.010  |
| <i>AI504432</i>      | 1.12 | 1.14E-03 | 0.010  |
| <i>Csnk1g2</i>       | 0.93 | 1.15E-03 | 0.010  |
| <i>Rimbp3</i>        | 1.09 | 1.15E-03 | 0.010  |
| <i>Tnik</i>          | 1.05 | 1.15E-03 | 0.010  |
| <i>Ccdc8</i>         | 1.14 | 1.16E-03 | 0.010  |
| <i>Rpl19</i>         | 0.94 | 1.16E-03 | 0.010  |
| <i>Nars</i>          | 0.89 | 1.16E-03 | 0.010  |
| <i>H2afj</i>         | 0.90 | 1.16E-03 | 0.010  |
| <i>Npr2</i>          | 1.17 | 1.16E-03 | 0.010  |
| <i>C3</i>            | 1.53 | 1.17E-03 | 0.010  |
| <i>Sfmbt2</i>        | 1.13 | 1.17E-03 | 0.010  |
| <i>Prps1</i>         | 0.89 | 1.17E-03 | 0.010  |
| <i>Rpl36</i>         | 0.91 | 1.17E-03 | 0.010  |

|                 |      |          |       |
|-----------------|------|----------|-------|
| <i>Mapk4</i>    | 1.08 | 1.17E-03 | 0.010 |
| <i>Wdr34</i>    | 0.89 | 1.17E-03 | 0.010 |
| <i>Tmem87b</i>  | 1.07 | 1.17E-03 | 0.010 |
| <i>Atp5o</i>    | 0.93 | 1.17E-03 | 0.010 |
| <i>Zfhx2</i>    | 1.08 | 1.18E-03 | 0.010 |
| <i>Tomm22</i>   | 0.96 | 1.18E-03 | 0.011 |
| <i>Prrc2c</i>   | 1.11 | 1.19E-03 | 0.011 |
| <i>Zfp111</i>   | 1.06 | 1.19E-03 | 0.011 |
| <i>Zfp558</i>   | 1.10 | 1.18E-03 | 0.011 |
| <i>Tm2d3</i>    | 0.92 | 1.19E-03 | 0.011 |
| <i>Chrd</i>     | 1.18 | 1.19E-03 | 0.011 |
| <i>Mrpl3</i>    | 0.95 | 1.19E-03 | 0.011 |
| <i>Sbsn</i>     | 1.26 | 1.20E-03 | 0.011 |
| <i>Mical2</i>   | 1.10 | 1.20E-03 | 0.011 |
| <i>Gatsl2</i>   | 1.10 | 1.20E-03 | 0.011 |
| <i>Ttc1</i>     | 0.96 | 1.21E-03 | 0.011 |
| <i>Emc10</i>    | 0.89 | 1.21E-03 | 0.011 |
| <i>Ecsit</i>    | 0.91 | 1.21E-03 | 0.011 |
| <i>Gipc1</i>    | 0.93 | 1.21E-03 | 0.011 |
| <i>Ndrp1</i>    | 1.14 | 1.22E-03 | 0.011 |
| <i>Egln2</i>    | 0.90 | 1.22E-03 | 0.011 |
| <i>Yif1b</i>    | 0.86 | 1.22E-03 | 0.011 |
| <i>Rad23a</i>   | 0.92 | 1.23E-03 | 0.011 |
| <i>Cbx7</i>     | 1.17 | 1.23E-03 | 0.011 |
| <i>Spop</i>     | 1.08 | 1.24E-03 | 0.011 |
| <i>Tomm7</i>    | 0.89 | 1.24E-03 | 0.011 |
| <i>Gm5617</i>   | 0.77 | 1.24E-03 | 0.011 |
| <i>Wipf3</i>    | 1.12 | 1.24E-03 | 0.011 |
| <i>Sorbs3</i>   | 1.14 | 1.24E-03 | 0.011 |
| <i>Synm</i>     | 1.02 | 1.25E-03 | 0.011 |
| <i>Reep2</i>    | 0.92 | 1.25E-03 | 0.011 |
| <i>Svep1</i>    | 1.27 | 1.25E-03 | 0.011 |
| <i>Fbln5</i>    | 1.29 | 1.25E-03 | 0.011 |
| <i>Faf1</i>     | 0.88 | 1.25E-03 | 0.011 |
| <i>Atpif1</i>   | 0.94 | 1.25E-03 | 0.011 |
| <i>Zfp592</i>   | 1.00 | 1.25E-03 | 0.011 |
| <i>Dhrs13</i>   | 0.89 | 1.26E-03 | 0.011 |
| <i>Pak1ip1</i>  | 0.91 | 1.25E-03 | 0.011 |
| <i>Itgbl1</i>   | 1.23 | 1.26E-03 | 0.011 |
| <i>Phf21a</i>   | 1.11 | 1.26E-03 | 0.011 |
| <i>H19</i>      | 1.36 | 1.26E-03 | 0.011 |
| <i>Prrg4</i>    | 1.43 | 1.26E-03 | 0.011 |
| <i>AU021092</i> | 0.84 | 1.27E-03 | 0.011 |
| <i>Bag3</i>     | 1.20 | 1.27E-03 | 0.011 |
| <i>Manf</i>     | 0.91 | 1.27E-03 | 0.011 |
| <i>Traf3ip2</i> | 1.15 | 1.27E-03 | 0.011 |
| <i>BC051226</i> | 0.90 | 1.27E-03 | 0.011 |
| <i>Hagh</i>     | 0.89 | 1.28E-03 | 0.011 |
| <i>S100a16</i>  | 0.87 | 1.28E-03 | 0.011 |

|                      |      |          |       |
|----------------------|------|----------|-------|
| <i>Nudt9</i>         | 0.94 | 1.30E-03 | 0.011 |
| <i>Chd6</i>          | 1.05 | 1.30E-03 | 0.011 |
| <i>Clip1</i>         | 1.08 | 1.32E-03 | 0.011 |
| <i>Ank1</i>          | 0.99 | 1.32E-03 | 0.011 |
| <i>Zmym5</i>         | 1.02 | 1.32E-03 | 0.011 |
| <i>Trappc2l</i>      | 0.93 | 1.32E-03 | 0.011 |
| <i>Sema3f</i>        | 1.14 | 1.32E-03 | 0.011 |
| <i>Pld4</i>          | 1.30 | 1.33E-03 | 0.011 |
| <i>2410015M20Rik</i> | 0.90 | 1.33E-03 | 0.011 |
| <i>9130011E15Rik</i> | 0.88 | 1.34E-03 | 0.011 |
| <i>Zfp629</i>        | 1.03 | 1.34E-03 | 0.011 |
| <i>Znrf1</i>         | 1.03 | 1.34E-03 | 0.011 |
| <i>Unc5b</i>         | 1.08 | 1.35E-03 | 0.012 |
| <i>Eif2b4</i>        | 0.92 | 1.35E-03 | 0.012 |
| <i>Trove2</i>        | 1.08 | 1.35E-03 | 0.012 |
| <i>Lsm7</i>          | 0.90 | 1.35E-03 | 0.012 |
| <i>Ptk7</i>          | 1.11 | 1.35E-03 | 0.012 |
| <i>Ilk</i>           | 0.95 | 1.36E-03 | 0.012 |
| <i>Med29</i>         | 0.85 | 1.37E-03 | 0.012 |
| <i>Pspc1</i>         | 0.92 | 1.37E-03 | 0.012 |
| <i>Rev3l</i>         | 1.04 | 1.38E-03 | 0.012 |
| <i>Cdipt</i>         | 0.88 | 1.38E-03 | 0.012 |
| <i>Vps45</i>         | 0.90 | 1.38E-03 | 0.012 |
| <i>Snx3</i>          | 0.94 | 1.38E-03 | 0.012 |
| <i>Reps2</i>         | 1.08 | 1.39E-03 | 0.012 |
| <i>Cdc42</i>         | 0.92 | 1.39E-03 | 0.012 |
| <i>Zfp169</i>        | 1.09 | 1.40E-03 | 0.012 |
| <i>Mcam</i>          | 1.19 | 1.41E-03 | 0.012 |
| <i>Arl2bp</i>        | 0.93 | 1.41E-03 | 0.012 |
| <i>Nip7</i>          | 0.87 | 1.41E-03 | 0.012 |
| <i>Rps8</i>          | 0.94 | 1.41E-03 | 0.012 |
| <i>Arf2</i>          | 0.90 | 1.42E-03 | 0.012 |
| <i>Dvl3</i>          | 1.09 | 1.42E-03 | 0.012 |
| <i>Nfkbib</i>        | 0.87 | 1.42E-03 | 0.012 |
| <i>Atp11a</i>        | 1.04 | 1.42E-03 | 0.012 |
| <i>Bptf</i>          | 1.04 | 1.42E-03 | 0.012 |
| <i>Pim3</i>          | 0.83 | 1.42E-03 | 0.012 |
| <i>Dennd4c</i>       | 1.07 | 1.42E-03 | 0.012 |
| <i>Kcnn3</i>         | 1.06 | 1.43E-03 | 0.012 |
| <i>Psmc9</i>         | 0.87 | 1.43E-03 | 0.012 |
| <i>Bccip</i>         | 0.95 | 1.44E-03 | 0.012 |
| <i>Fbl1</i>          | 0.88 | 1.44E-03 | 0.012 |
| <i>Fbln2</i>         | 1.10 | 1.44E-03 | 0.012 |
| <i>Dbi</i>           | 0.96 | 1.45E-03 | 0.012 |
| <i>Pgrmc2</i>        | 0.94 | 1.45E-03 | 0.012 |
| <i>Zmym4</i>         | 1.02 | 1.46E-03 | 0.012 |
| <i>Tmem178b</i>      | 1.17 | 1.46E-03 | 0.012 |
| <i>2210016F16Rik</i> | 0.87 | 1.46E-03 | 0.012 |
| <i>lfrd1</i>         | 0.92 | 1.46E-03 | 0.012 |

|                 |      |          |       |
|-----------------|------|----------|-------|
| <i>Atrn</i>     | 1.02 | 1.47E-03 | 0.012 |
| <i>Pdcd5</i>    | 0.91 | 1.47E-03 | 0.012 |
| <i>Sdhd</i>     | 0.89 | 1.47E-03 | 0.012 |
| <i>Agpat5</i>   | 0.91 | 1.47E-03 | 0.012 |
| <i>Papd5</i>    | 1.08 | 1.47E-03 | 0.012 |
| <i>Slc6a20a</i> | 1.59 | 1.48E-03 | 0.012 |
| <i>Heca</i>     | 1.11 | 1.48E-03 | 0.012 |
| <i>Mrps23</i>   | 0.95 | 1.48E-03 | 0.012 |
| <i>Accs</i>     | 1.29 | 1.48E-03 | 0.012 |
| <i>Arhgap32</i> | 1.00 | 1.49E-03 | 0.012 |
| <i>Lamp2</i>    | 1.07 | 1.49E-03 | 0.012 |
| <i>Pcdhga7</i>  | 1.08 | 1.50E-03 | 0.012 |
| <i>Tsc1</i>     | 0.99 | 1.50E-03 | 0.012 |
| <i>Osbpl3</i>   | 1.08 | 1.50E-03 | 0.012 |
| <i>Pex19</i>    | 0.90 | 1.51E-03 | 0.012 |
| <i>Ralgapa1</i> | 1.06 | 1.51E-03 | 0.012 |
| <i>Ahrr</i>     | 1.22 | 1.51E-03 | 0.012 |
| <i>Dab2</i>     | 1.26 | 1.51E-03 | 0.012 |
| <i>Scg5</i>     | 0.96 | 1.51E-03 | 0.012 |
| <i>Ptpmt1</i>   | 0.92 | 1.51E-03 | 0.013 |
| <i>Zkscan8</i>  | 1.13 | 1.51E-03 | 0.013 |
| <i>Trim2</i>    | 1.00 | 1.52E-03 | 0.013 |
| <i>Med21</i>    | 0.93 | 1.52E-03 | 0.013 |
| <i>Lamtor5</i>  | 0.96 | 1.53E-03 | 0.013 |
| <i>Mier1</i>    | 1.07 | 1.53E-03 | 0.013 |
| <i>Tnip1</i>    | 0.83 | 1.53E-03 | 0.013 |
| <i>Daam1</i>    | 1.07 | 1.53E-03 | 0.013 |
| <i>Poldip2</i>  | 0.93 | 1.54E-03 | 0.013 |
| <i>Fopnl</i>    | 0.94 | 1.54E-03 | 0.013 |
| <i>Ptprt</i>    | 1.07 | 1.54E-03 | 0.013 |
| <i>Lcorl</i>    | 1.01 | 1.54E-03 | 0.013 |
| <i>Ggct</i>     | 0.82 | 1.54E-03 | 0.013 |
| <i>Rpl39</i>    | 0.88 | 1.54E-03 | 0.013 |
| <i>Mga</i>      | 1.03 | 1.55E-03 | 0.013 |
| <i>Rps11</i>    | 0.97 | 1.55E-03 | 0.013 |
| <i>Vdac3</i>    | 0.91 | 1.55E-03 | 0.013 |
| <i>Pcmt2</i>    | 1.12 | 1.55E-03 | 0.013 |
| <i>Ncan</i>     | 1.03 | 1.56E-03 | 0.013 |
| <i>Tars2</i>    | 0.85 | 1.56E-03 | 0.013 |
| <i>Vac14</i>    | 0.90 | 1.56E-03 | 0.013 |
| <i>Dap3</i>     | 0.87 | 1.58E-03 | 0.013 |
| <i>Timm50</i>   | 0.89 | 1.59E-03 | 0.013 |
| <i>Fam126b</i>  | 1.02 | 1.59E-03 | 0.013 |
| <i>Cdk13</i>    | 1.08 | 1.60E-03 | 0.013 |
| <i>Ccdc141</i>  | 1.06 | 1.60E-03 | 0.013 |
| <i>Uqcrh</i>    | 0.95 | 1.61E-03 | 0.013 |
| <i>Mrpl18</i>   | 0.94 | 1.61E-03 | 0.013 |
| <i>Zfx4</i>     | 1.11 | 1.61E-03 | 0.013 |
| <i>Rab1b</i>    | 0.89 | 1.62E-03 | 0.013 |

|                 |      |          |       |
|-----------------|------|----------|-------|
| <i>Apbb1</i>    | 0.87 | 1.63E-03 | 0.013 |
| <i>Usp9x</i>    | 1.03 | 1.63E-03 | 0.013 |
| <i>Ctbp1</i>    | 0.90 | 1.63E-03 | 0.013 |
| <i>Mbd3</i>     | 0.91 | 1.63E-03 | 0.013 |
| <i>Rnd2</i>     | 0.94 | 1.64E-03 | 0.013 |
| <i>Fau</i>      | 0.92 | 1.64E-03 | 0.013 |
| <i>Atp5d</i>    | 0.94 | 1.64E-03 | 0.013 |
| <i>Nrbp1</i>    | 0.93 | 1.64E-03 | 0.013 |
| <i>N4bp2</i>    | 1.10 | 1.64E-03 | 0.013 |
| <i>Upf3a</i>    | 0.93 | 1.64E-03 | 0.013 |
| <i>Asnsd1</i>   | 0.90 | 1.65E-03 | 0.013 |
| <i>Ncor1</i>    | 1.01 | 1.65E-03 | 0.013 |
| <i>Mdga2</i>    | 1.04 | 1.65E-03 | 0.013 |
| <i>Plekhh1</i>  | 1.06 | 1.65E-03 | 0.013 |
| <i>Myo10</i>    | 1.00 | 1.65E-03 | 0.013 |
| <i>Tirap</i>    | 1.11 | 1.66E-03 | 0.013 |
| <i>Rnf19b</i>   | 0.88 | 1.66E-03 | 0.013 |
| <i>Pard6a</i>   | 0.88 | 1.67E-03 | 0.013 |
| <i>Tmsb4x</i>   | 0.96 | 1.67E-03 | 0.013 |
| <i>Alyref2</i>  | 0.95 | 1.67E-03 | 0.013 |
| <i>Exosc5</i>   | 0.85 | 1.68E-03 | 0.013 |
| <i>Arl8a</i>    | 0.97 | 1.68E-03 | 0.013 |
| <i>Acvr1b</i>   | 1.08 | 1.68E-03 | 0.013 |
| <i>Ids</i>      | 1.08 | 1.68E-03 | 0.013 |
| <i>Ehd1</i>     | 0.92 | 1.69E-03 | 0.014 |
| <i>Psmc7</i>    | 0.95 | 1.69E-03 | 0.014 |
| <i>Kcne1l</i>   | 0.90 | 1.70E-03 | 0.014 |
| <i>Trmt112</i>  | 0.93 | 1.70E-03 | 0.014 |
| <i>Zc3h7a</i>   | 1.15 | 1.70E-03 | 0.014 |
| <i>Zc3h12b</i>  | 1.17 | 1.70E-03 | 0.014 |
| <i>Nktr</i>     | 1.13 | 1.71E-03 | 0.014 |
| <i>Appl1</i>    | 1.04 | 1.71E-03 | 0.014 |
| <i>Zfp609</i>   | 1.06 | 1.71E-03 | 0.014 |
| <i>Snap23</i>   | 1.15 | 1.72E-03 | 0.014 |
| <i>Pikfyve</i>  | 1.03 | 1.72E-03 | 0.014 |
| <i>Ptrhd1</i>   | 0.89 | 1.73E-03 | 0.014 |
| <i>Rab4b</i>    | 0.95 | 1.73E-03 | 0.014 |
| <i>Mst1r</i>    | 1.27 | 1.72E-03 | 0.014 |
| <i>Gdf11</i>    | 1.15 | 1.73E-03 | 0.014 |
| <i>Uqcrfs1</i>  | 0.91 | 1.73E-03 | 0.014 |
| <i>Atp6v0e2</i> | 0.86 | 1.73E-03 | 0.014 |
| <i>Pin1</i>     | 0.83 | 1.74E-03 | 0.014 |
| <i>Tmem167b</i> | 0.93 | 1.75E-03 | 0.014 |
| <i>Jmjd1c</i>   | 1.12 | 1.75E-03 | 0.014 |
| <i>Gm960</i>    | 1.31 | 1.76E-03 | 0.014 |
| <i>Zfat</i>     | 0.79 | 1.76E-03 | 0.014 |
| <i>Ryr3</i>     | 1.02 | 1.76E-03 | 0.014 |
| <i>Eif1</i>     | 0.97 | 1.77E-03 | 0.014 |
| <i>Trank1</i>   | 1.10 | 1.77E-03 | 0.014 |

|                 |      |          |       |
|-----------------|------|----------|-------|
| <i>Yipf6</i>    | 1.05 | 1.77E-03 | 0.014 |
| <i>Jarid2</i>   | 1.06 | 1.77E-03 | 0.014 |
| <i>Dennd4a</i>  | 1.02 | 1.78E-03 | 0.014 |
| <i>Tubb2b</i>   | 0.96 | 1.78E-03 | 0.014 |
| <i>Znhit2</i>   | 0.87 | 1.79E-03 | 0.014 |
| <i>Ndufc1</i>   | 0.88 | 1.79E-03 | 0.014 |
| <i>Arl6ip1</i>  | 0.92 | 1.79E-03 | 0.014 |
| <i>Sorl1</i>    | 1.09 | 1.79E-03 | 0.014 |
| <i>BC037034</i> | 0.91 | 1.79E-03 | 0.014 |
| <i>Podn</i>     | 1.30 | 1.80E-03 | 0.014 |
| <i>Akap9</i>    | 1.10 | 1.80E-03 | 0.014 |
| <i>Setd2</i>    | 1.06 | 1.80E-03 | 0.014 |
| <i>Hic2</i>     | 1.05 | 1.81E-03 | 0.014 |
| <i>Gm12060</i>  | 0.77 | 1.81E-03 | 0.014 |
| <i>Alg10b</i>   | 1.07 | 1.81E-03 | 0.014 |
| <i>Ak1</i>      | 0.90 | 1.81E-03 | 0.014 |
| <i>Etfb</i>     | 0.89 | 1.81E-03 | 0.014 |
| <i>Rtbdn</i>    | 1.24 | 1.81E-03 | 0.014 |
| <i>Pxdn</i>     | 1.06 | 1.82E-03 | 0.014 |
| <i>Stx16</i>    | 1.08 | 1.82E-03 | 0.014 |
| <i>Ngdn</i>     | 0.91 | 1.82E-03 | 0.014 |
| <i>Plxna1</i>   | 1.05 | 1.82E-03 | 0.014 |
| <i>Apc2</i>     | 1.03 | 1.83E-03 | 0.014 |
| <i>Rnf169</i>   | 1.06 | 1.83E-03 | 0.014 |
| <i>Mmp16</i>    | 1.11 | 1.84E-03 | 0.014 |
| <i>Slc35f1</i>  | 1.07 | 1.84E-03 | 0.014 |
| <i>Acot7</i>    | 0.84 | 1.84E-03 | 0.014 |
| <i>Tnks</i>     | 1.05 | 1.84E-03 | 0.014 |
| <i>Srsf5</i>    | 1.20 | 1.85E-03 | 0.014 |
| <i>Cnr1</i>     | 1.11 | 1.85E-03 | 0.014 |
| <i>Txn14a</i>   | 0.86 | 1.86E-03 | 0.014 |
| <i>Eif2b1</i>   | 0.92 | 1.86E-03 | 0.014 |
| <i>Stag3</i>    | 1.20 | 1.86E-03 | 0.014 |
| <i>Arl6ip4</i>  | 0.93 | 1.86E-03 | 0.014 |
| <i>Acp1</i>     | 0.89 | 1.86E-03 | 0.014 |
| <i>Nrip1</i>    | 1.18 | 1.86E-03 | 0.014 |
| <i>Hcfc1r1</i>  | 0.93 | 1.86E-03 | 0.014 |
| <i>Ndufb2</i>   | 0.86 | 1.86E-03 | 0.014 |
| <i>Maged1</i>   | 0.96 | 1.87E-03 | 0.014 |
| <i>Plekhg1</i>  | 1.09 | 1.88E-03 | 0.014 |
| <i>Nav3</i>     | 1.02 | 1.88E-03 | 0.014 |
| <i>Cep250</i>   | 1.06 | 1.88E-03 | 0.014 |
| <i>Fcgrt</i>    | 1.29 | 1.88E-03 | 0.014 |
| <i>Igsf6</i>    | 1.44 | 1.88E-03 | 0.014 |
| <i>Ptprs</i>    | 1.05 | 1.88E-03 | 0.014 |
| <i>Uchl4</i>    | 0.94 | 1.88E-03 | 0.014 |
| <i>Stxbp5l</i>  | 1.07 | 1.89E-03 | 0.014 |
| <i>Slc22a8</i>  | 1.15 | 1.89E-03 | 0.014 |
| <i>Rpl13</i>    | 0.94 | 1.89E-03 | 0.014 |

|                      |      |          |       |
|----------------------|------|----------|-------|
| <i>Zbtb16</i>        | 1.08 | 1.89E-03 | 0.014 |
| <i>Psmc4</i>         | 0.99 | 1.89E-03 | 0.014 |
| <i>Usp49</i>         | 1.10 | 1.91E-03 | 0.015 |
| <i>Ano6</i>          | 1.04 | 1.91E-03 | 0.015 |
| <i>Ubr5</i>          | 1.05 | 1.92E-03 | 0.015 |
| <i>Pml</i>           | 1.07 | 1.92E-03 | 0.015 |
| <i>Lanc13</i>        | 1.16 | 1.93E-03 | 0.015 |
| <i>Slc7a8</i>        | 1.12 | 1.93E-03 | 0.015 |
| <i>Rps18</i>         | 0.92 | 1.93E-03 | 0.015 |
| <i>Mrps22</i>        | 0.93 | 1.93E-03 | 0.015 |
| <i>Psmc5</i>         | 0.90 | 1.94E-03 | 0.015 |
| <i>Chrac1</i>        | 0.87 | 1.94E-03 | 0.015 |
| <i>Spon2</i>         | 1.42 | 1.94E-03 | 0.015 |
| <i>Mrpl41</i>        | 0.86 | 1.95E-03 | 0.015 |
| <i>Aspscr1</i>       | 0.92 | 1.96E-03 | 0.015 |
| <i>Hsbp1</i>         | 0.93 | 1.98E-03 | 0.015 |
| <i>Gtf2h5</i>        | 0.99 | 1.99E-03 | 0.015 |
| <i>1700096K18Rik</i> | 0.85 | 1.99E-03 | 0.015 |
| <i>Kcnb1</i>         | 1.03 | 2.00E-03 | 0.015 |
| <i>C77370</i>        | 1.07 | 2.01E-03 | 0.015 |
| <i>Pold2</i>         | 0.87 | 2.03E-03 | 0.015 |
| <i>Ptar1</i>         | 1.16 | 2.03E-03 | 0.015 |
| <i>Ikzf4</i>         | 1.13 | 2.04E-03 | 0.015 |
| <i>Cldn1</i>         | 1.24 | 2.04E-03 | 0.015 |
| <i>Slco2b1</i>       | 1.07 | 2.03E-03 | 0.015 |
| <i>Ppp2r3a</i>       | 1.03 | 2.04E-03 | 0.015 |
| <i>Gria3</i>         | 1.09 | 2.04E-03 | 0.015 |
| <i>Vps52</i>         | 0.92 | 2.05E-03 | 0.015 |
| <i>Ubac1</i>         | 0.86 | 2.05E-03 | 0.015 |
| <i>Mob1b</i>         | 1.15 | 2.05E-03 | 0.015 |
| <i>Trip12</i>        | 1.03 | 2.06E-03 | 0.015 |
| <i>Grik3</i>         | 1.05 | 2.06E-03 | 0.015 |
| <i>Slc52a2</i>       | 0.86 | 2.07E-03 | 0.016 |
| <i>Sema4g</i>        | 1.05 | 2.07E-03 | 0.016 |
| <i>Med10</i>         | 0.98 | 2.08E-03 | 0.016 |
| <i>Atp6v1b2</i>      | 0.87 | 2.08E-03 | 0.016 |
| <i>Sh3bgrl3</i>      | 0.93 | 2.09E-03 | 0.016 |
| <i>Kptn</i>          | 0.89 | 2.09E-03 | 0.016 |
| <i>Klhdc4</i>        | 0.89 | 2.09E-03 | 0.016 |
| <i>Slirp</i>         | 0.89 | 2.10E-03 | 0.016 |
| <i>Csnk2b</i>        | 0.96 | 2.11E-03 | 0.016 |
| <i>Gpr156</i>        | 1.08 | 2.11E-03 | 0.016 |
| <i>Cox7b</i>         | 0.93 | 2.11E-03 | 0.016 |
| <i>Qsox1</i>         | 1.12 | 2.12E-03 | 0.016 |
| <i>Vps13b</i>        | 0.99 | 2.12E-03 | 0.016 |
| <i>Ebna1bp2</i>      | 0.89 | 2.12E-03 | 0.016 |
| <i>Sec61g</i>        | 0.82 | 2.12E-03 | 0.016 |
| <i>Chmp7</i>         | 0.89 | 2.12E-03 | 0.016 |
| <i>Rab3b</i>         | 0.83 | 2.12E-03 | 0.016 |

|                      |      |          |       |
|----------------------|------|----------|-------|
| <i>Mob3a</i>         | 0.93 | 2.13E-03 | 0.016 |
| <i>Mgat5</i>         | 1.10 | 2.13E-03 | 0.016 |
| <i>Sigmar1</i>       | 0.89 | 2.13E-03 | 0.016 |
| <i>Col25a1</i>       | 1.15 | 2.14E-03 | 0.016 |
| <i>Fam207a</i>       | 0.90 | 2.14E-03 | 0.016 |
| <i>Trim46</i>        | 0.91 | 2.14E-03 | 0.016 |
| <i>Ldlrad4</i>       | 1.15 | 2.14E-03 | 0.016 |
| <i>Yap1</i>          | 1.11 | 2.15E-03 | 0.016 |
| <i>Mrps21</i>        | 0.93 | 2.15E-03 | 0.016 |
| <i>Dock7</i>         | 1.11 | 2.15E-03 | 0.016 |
| <i>Rpl35</i>         | 0.95 | 2.16E-03 | 0.016 |
| <i>Fam228b</i>       | 1.26 | 2.16E-03 | 0.016 |
| <i>8030462N17Rik</i> | 1.11 | 2.17E-03 | 0.016 |
| <i>Actr3b</i>        | 0.89 | 2.17E-03 | 0.016 |
| <i>Ddx1</i>          | 0.92 | 2.18E-03 | 0.016 |
| <i>Map3k13</i>       | 1.04 | 2.18E-03 | 0.016 |
| <i>Ergic3</i>        | 0.97 | 2.18E-03 | 0.016 |
| <i>2900076A07Rik</i> | 1.32 | 2.18E-03 | 0.016 |
| <i>Ralgapa2</i>      | 1.05 | 2.19E-03 | 0.016 |
| <i>Necap1</i>        | 0.90 | 2.18E-03 | 0.016 |
| <i>Psmd13</i>        | 0.94 | 2.19E-03 | 0.016 |
| <i>Polr2h</i>        | 0.91 | 2.19E-03 | 0.016 |
| <i>Bmyc</i>          | 0.95 | 2.19E-03 | 0.016 |
| <i>Fmn2</i>          | 1.02 | 2.20E-03 | 0.016 |
| <i>Camsap1</i>       | 0.98 | 2.20E-03 | 0.016 |
| <i>Rp9</i>           | 0.96 | 2.21E-03 | 0.016 |
| <i>Gamt</i>          | 0.83 | 2.22E-03 | 0.016 |
| <i>Sox8</i>          | 0.88 | 2.22E-03 | 0.016 |
| <i>Rpl7</i>          | 0.97 | 2.22E-03 | 0.016 |
| <i>Bcorl1</i>        | 1.07 | 2.23E-03 | 0.016 |
| <i>Nucks1</i>        | 1.03 | 2.23E-03 | 0.016 |
| <i>Arid5b</i>        | 1.12 | 2.24E-03 | 0.016 |
| <i>Cast</i>          | 1.34 | 2.24E-03 | 0.016 |
| <i>Ndufa2</i>        | 0.89 | 2.24E-03 | 0.016 |
| <i>Scfd1</i>         | 0.91 | 2.25E-03 | 0.016 |
| <i>Atp6v0d1</i>      | 0.93 | 2.25E-03 | 0.016 |
| <i>Ralgps2</i>       | 1.01 | 2.26E-03 | 0.016 |
| <i>Dcdc2a</i>        | 1.21 | 2.26E-03 | 0.016 |
| <i>Dgcr6</i>         | 0.92 | 2.26E-03 | 0.016 |
| <i>Chmp4b</i>        | 0.94 | 2.26E-03 | 0.016 |
| <i>Foxj3</i>         | 1.05 | 2.26E-03 | 0.016 |
| <i>Pdzd11</i>        | 0.95 | 2.26E-03 | 0.016 |
| <i>Actr10</i>        | 0.91 | 2.27E-03 | 0.016 |
| <i>Jagn1</i>         | 0.92 | 2.27E-03 | 0.016 |
| <i>Med28</i>         | 0.80 | 2.27E-03 | 0.016 |
| <i>Larp4</i>         | 1.09 | 2.27E-03 | 0.016 |
| <i>Ptpn4</i>         | 1.14 | 2.28E-03 | 0.017 |
| <i>Smarchb1</i>      | 0.95 | 2.29E-03 | 0.017 |
| <i>Crebbp</i>        | 1.08 | 2.29E-03 | 0.017 |



|                      |      |          |       |
|----------------------|------|----------|-------|
| <i>Clstn2</i>        | 1.13 | 2.29E-03 | 0.017 |
| <i>Gria2</i>         | 1.14 | 2.30E-03 | 0.017 |
| <i>Kcnc1</i>         | 1.03 | 2.31E-03 | 0.017 |
| <i>Inha</i>          | 1.21 | 2.31E-03 | 0.017 |
| <i>Prkcq</i>         | 0.78 | 2.31E-03 | 0.017 |
| <i>Tpi1</i>          | 0.84 | 2.31E-03 | 0.017 |
| <i>Pgam1</i>         | 0.90 | 2.33E-03 | 0.017 |
| <i>Syt5</i>          | 0.94 | 2.33E-03 | 0.017 |
| <i>Chrna7</i>        | 1.13 | 2.33E-03 | 0.017 |
| <i>Phyhd1</i>        | 1.25 | 2.33E-03 | 0.017 |
| <i>Atp8a2</i>        | 1.08 | 2.34E-03 | 0.017 |
| <i>Tac1</i>          | 0.92 | 2.34E-03 | 0.017 |
| <i>Lamtor1</i>       | 0.94 | 2.35E-03 | 0.017 |
| <i>Mrpl22</i>        | 0.90 | 2.35E-03 | 0.017 |
| <i>Cox5b</i>         | 0.92 | 2.35E-03 | 0.017 |
| <i>Polr2i</i>        | 0.94 | 2.35E-03 | 0.017 |
| <i>Mtx3</i>          | 1.06 | 2.36E-03 | 0.017 |
| <i>Psmc1</i>         | 0.95 | 2.36E-03 | 0.017 |
| <i>Klhdc10</i>       | 1.04 | 2.37E-03 | 0.017 |
| <i>C1qtnf1</i>       | 1.12 | 2.37E-03 | 0.017 |
| <i>Tmem150a</i>      | 1.22 | 2.39E-03 | 0.017 |
| <i>Imp3</i>          | 0.94 | 2.39E-03 | 0.017 |
| <i>Arhgef1</i>       | 1.18 | 2.40E-03 | 0.017 |
| <i>Fkbp4</i>         | 0.90 | 2.40E-03 | 0.017 |
| <i>Cdc16</i>         | 0.93 | 2.40E-03 | 0.017 |
| <i>Fkbp1b</i>        | 0.90 | 2.41E-03 | 0.017 |
| <i>Smim12</i>        | 0.91 | 2.41E-03 | 0.017 |
| <i>Pwwp2a</i>        | 1.05 | 2.42E-03 | 0.017 |
| <i>Lsm2</i>          | 0.92 | 2.42E-03 | 0.017 |
| <i>Eif4g3</i>        | 1.06 | 2.43E-03 | 0.017 |
| <i>Dscr3</i>         | 0.89 | 2.43E-03 | 0.017 |
| <i>Fabp7</i>         | 0.96 | 2.44E-03 | 0.017 |
| <i>Gosr2</i>         | 0.91 | 2.44E-03 | 0.017 |
| <i>Usp45</i>         | 1.11 | 2.44E-03 | 0.017 |
| <i>Ptpru</i>         | 1.06 | 2.44E-03 | 0.017 |
| <i>Polr2d</i>        | 0.95 | 2.45E-03 | 0.017 |
| <i>Gng10</i>         | 0.97 | 2.45E-03 | 0.017 |
| <i>C530008M17Rik</i> | 1.03 | 2.48E-03 | 0.018 |
| <i>Syt7</i>          | 1.03 | 2.48E-03 | 0.018 |
| <i>Sstr4</i>         | 1.28 | 2.49E-03 | 0.018 |
| <i>Trim33</i>        | 1.03 | 2.49E-03 | 0.018 |
| <i>Zfhx3</i>         | 1.09 | 2.50E-03 | 0.018 |
| <i>Inpp5e</i>        | 1.05 | 2.51E-03 | 0.018 |
| <i>Kit</i>           | 1.05 | 2.51E-03 | 0.018 |
| <i>Abcc5</i>         | 1.11 | 2.51E-03 | 0.018 |
| <i>Spopl</i>         | 1.13 | 2.53E-03 | 0.018 |
| <i>Ankrd24</i>       | 1.16 | 2.54E-03 | 0.018 |
| <i>Birc6</i>         | 1.02 | 2.55E-03 | 0.018 |
| <i>Pccb</i>          | 0.88 | 2.55E-03 | 0.018 |

|                      |      |          |       |
|----------------------|------|----------|-------|
| <i>Nynrin</i>        | 1.03 | 2.56E-03 | 0.018 |
| <i>Isca1</i>         | 0.93 | 2.57E-03 | 0.018 |
| <i>Tmem256</i>       | 0.90 | 2.57E-03 | 0.018 |
| <i>Pabpc4l</i>       | 1.18 | 2.58E-03 | 0.018 |
| <i>Tmem64</i>        | 1.10 | 2.59E-03 | 0.018 |
| <i>Acyp1</i>         | 0.91 | 2.59E-03 | 0.018 |
| <i>Ctnnd1</i>        | 1.08 | 2.59E-03 | 0.018 |
| <i>Snrrnp40</i>      | 0.90 | 2.59E-03 | 0.018 |
| <i>Gramd1b</i>       | 1.10 | 2.59E-03 | 0.018 |
| <i>Pfdn2</i>         | 0.98 | 2.60E-03 | 0.018 |
| <i>Erh</i>           | 0.97 | 2.61E-03 | 0.018 |
| <i>Cenpm</i>         | 0.80 | 2.61E-03 | 0.018 |
| <i>Pik3c2b</i>       | 1.07 | 2.62E-03 | 0.018 |
| <i>Dkk2</i>          | 1.23 | 2.62E-03 | 0.018 |
| <i>Osbpl8</i>        | 1.08 | 2.62E-03 | 0.018 |
| <i>Slc23a2</i>       | 1.03 | 2.62E-03 | 0.018 |
| <i>Ccdc91</i>        | 0.88 | 2.63E-03 | 0.018 |
| <i>Mtcp1</i>         | 1.15 | 2.63E-03 | 0.018 |
| <i>B3galnt2</i>      | 1.18 | 2.63E-03 | 0.018 |
| <i>Xkr6</i>          | 1.15 | 2.65E-03 | 0.018 |
| <i>Ubxn1</i>         | 0.97 | 2.65E-03 | 0.019 |
| <i>Hspd1</i>         | 0.95 | 2.66E-03 | 0.019 |
| <i>Slc1a2</i>        | 1.04 | 2.66E-03 | 0.019 |
| <i>Fxn</i>           | 0.87 | 2.67E-03 | 0.019 |
| <i>Chd1</i>          | 1.09 | 2.68E-03 | 0.019 |
| <i>9330159M07Rik</i> | 1.33 | 2.69E-03 | 0.019 |
| <i>Taf9</i>          | 0.92 | 2.70E-03 | 0.019 |
| <i>Dynlrb1</i>       | 0.96 | 2.70E-03 | 0.019 |
| <i>Hsd17b7</i>       | 0.83 | 2.71E-03 | 0.019 |
| <i>Sec63</i>         | 1.07 | 2.71E-03 | 0.019 |
| <i>Npc1</i>          | 1.07 | 2.71E-03 | 0.019 |
| <i>Ubr4</i>          | 0.98 | 2.71E-03 | 0.019 |
| <i>Apitd1</i>        | 0.83 | 2.72E-03 | 0.019 |
| <i>Dock5</i>         | 1.14 | 2.72E-03 | 0.019 |
| <i>Megf10</i>        | 1.03 | 2.73E-03 | 0.019 |
| <i>Mtfr1l</i>        | 0.93 | 2.73E-03 | 0.019 |
| <i>Lrrc32</i>        | 1.15 | 2.73E-03 | 0.019 |
| <i>Aff2</i>          | 1.12 | 2.73E-03 | 0.019 |
| <i>Slc35d1</i>       | 1.13 | 2.73E-03 | 0.019 |
| <i>Psmg1</i>         | 0.92 | 2.73E-03 | 0.019 |
| <i>Sdhaf1</i>        | 0.95 | 2.73E-03 | 0.019 |
| <i>Hspa12a</i>       | 1.03 | 2.74E-03 | 0.019 |
| <i>Mars2</i>         | 1.14 | 2.75E-03 | 0.019 |
| <i>Ap5m1</i>         | 1.13 | 2.75E-03 | 0.019 |
| <i>Irak1bp1</i>      | 0.92 | 2.75E-03 | 0.019 |
| <i>Frs2</i>          | 1.05 | 2.76E-03 | 0.019 |
| <i>Asap2</i>         | 1.06 | 2.76E-03 | 0.019 |
| <i>Psenen</i>        | 0.93 | 2.76E-03 | 0.019 |
| <i>Npdc1</i>         | 0.96 | 2.76E-03 | 0.019 |

|                      |      |          |       |
|----------------------|------|----------|-------|
| <i>Sos1</i>          | 1.04 | 2.77E-03 | 0.019 |
| <i>Setbp1</i>        | 1.08 | 2.77E-03 | 0.019 |
| <i>Rictor</i>        | 1.07 | 2.77E-03 | 0.019 |
| <i>Pofut2</i>        | 0.92 | 2.78E-03 | 0.019 |
| <i>Ror2</i>          | 1.25 | 2.78E-03 | 0.019 |
| <i>Ung</i>           | 0.79 | 2.78E-03 | 0.019 |
| <i>Scn3a</i>         | 1.05 | 2.79E-03 | 0.019 |
| <i>Exoc7</i>         | 0.92 | 2.80E-03 | 0.019 |
| <i>Csf1</i>          | 1.14 | 2.80E-03 | 0.019 |
| <i>Aimp1</i>         | 0.95 | 2.81E-03 | 0.019 |
| <i>Tet2</i>          | 1.08 | 2.82E-03 | 0.019 |
| <i>Cers4</i>         | 1.15 | 2.82E-03 | 0.019 |
| <i>Prcc</i>          | 0.93 | 2.83E-03 | 0.019 |
| <i>Rock1</i>         | 1.16 | 2.83E-03 | 0.019 |
| <i>Ubl7</i>          | 0.94 | 2.83E-03 | 0.019 |
| <i>Slc16a9</i>       | 1.26 | 2.84E-03 | 0.019 |
| <i>Arglu1</i>        | 1.23 | 2.84E-03 | 0.019 |
| <i>Nt5c</i>          | 0.97 | 2.84E-03 | 0.019 |
| <i>Fmn1</i>          | 1.13 | 2.85E-03 | 0.019 |
| <i>Ppp1r9a</i>       | 1.02 | 2.85E-03 | 0.019 |
| <i>Cfb</i>           | 1.15 | 2.87E-03 | 0.019 |
| <i>Ece1</i>          | 1.07 | 2.87E-03 | 0.019 |
| <i>Psmc12</i>        | 0.95 | 2.87E-03 | 0.020 |
| <i>Zfp516</i>        | 1.10 | 2.88E-03 | 0.020 |
| <i>Il17rd</i>        | 1.05 | 2.88E-03 | 0.020 |
| <i>Gm7102</i>        | 0.79 | 2.88E-03 | 0.020 |
| <i>Ptdss1</i>        | 0.89 | 2.89E-03 | 0.020 |
| <i>Edaradd</i>       | 1.01 | 2.90E-03 | 0.020 |
| <i>Klf2</i>          | 1.21 | 2.91E-03 | 0.020 |
| <i>Phax</i>          | 0.92 | 2.92E-03 | 0.020 |
| <i>Slc29a3</i>       | 1.10 | 2.92E-03 | 0.020 |
| <i>Tgfb1</i>         | 1.29 | 2.93E-03 | 0.020 |
| <i>Slc25a3</i>       | 0.91 | 2.93E-03 | 0.020 |
| <i>Zfp652</i>        | 1.16 | 2.95E-03 | 0.020 |
| <i>2810013P06Rik</i> | 0.90 | 2.95E-03 | 0.020 |
| <i>Tmod2</i>         | 1.01 | 2.96E-03 | 0.020 |
| <i>Crispld1</i>      | 1.25 | 2.96E-03 | 0.020 |
| <i>Mrpl2</i>         | 0.94 | 2.96E-03 | 0.020 |
| <i>Notch1</i>        | 1.03 | 2.96E-03 | 0.020 |
| <i>Cops2</i>         | 0.94 | 2.96E-03 | 0.020 |
| <i>Ncbp2</i>         | 0.95 | 2.97E-03 | 0.020 |
| <i>Dnmt3b</i>        | 1.16 | 2.97E-03 | 0.020 |
| <i>Ppp4r1l-ps</i>    | 1.09 | 2.98E-03 | 0.020 |
| <i>Steap3</i>        | 1.22 | 2.98E-03 | 0.020 |
| <i>Dlg1</i>          | 1.06 | 2.98E-03 | 0.020 |
| <i>Jmjd8</i>         | 0.92 | 2.99E-03 | 0.020 |
| <i>Sec16a</i>        | 1.02 | 2.99E-03 | 0.020 |
| <i>Fam213b</i>       | 0.85 | 2.99E-03 | 0.020 |
| <i>Ola1</i>          | 0.92 | 2.99E-03 | 0.020 |

|                      |      |          |       |
|----------------------|------|----------|-------|
| <i>Glis3</i>         | 1.21 | 3.00E-03 | 0.020 |
| <i>Usp34</i>         | 1.01 | 3.01E-03 | 0.020 |
| <i>Guk1</i>          | 0.88 | 3.01E-03 | 0.020 |
| <i>Snap47</i>        | 0.90 | 3.02E-03 | 0.020 |
| <i>Ppm1l</i>         | 1.08 | 3.03E-03 | 0.020 |
| <i>Eif4ebp1</i>      | 0.67 | 3.03E-03 | 0.020 |
| <i>Fam160b1</i>      | 1.06 | 3.03E-03 | 0.020 |
| <i>Rfc2</i>          | 0.93 | 3.03E-03 | 0.020 |
| <i>Rps9</i>          | 0.90 | 3.04E-03 | 0.020 |
| <i>Sdk2</i>          | 1.07 | 3.05E-03 | 0.020 |
| <i>Ppp2cb</i>        | 0.96 | 3.05E-03 | 0.020 |
| <i>Dlst</i>          | 0.94 | 3.06E-03 | 0.020 |
| <i>Cbx5</i>          | 0.99 | 3.06E-03 | 0.020 |
| <i>Rab3a</i>         | 0.92 | 3.06E-03 | 0.020 |
| <i>Ctu2</i>          | 0.83 | 3.06E-03 | 0.020 |
| <i>Rps27a</i>        | 0.91 | 3.07E-03 | 0.020 |
| <i>Ylpm1</i>         | 1.09 | 3.07E-03 | 0.020 |
| <i>Agtrap</i>        | 1.15 | 3.07E-03 | 0.020 |
| <i>Scarf2</i>        | 1.26 | 3.08E-03 | 0.020 |
| <i>Wfikkn2</i>       | 1.21 | 3.10E-03 | 0.021 |
| <i>Unc13a</i>        | 0.99 | 3.10E-03 | 0.021 |
| <i>Kif5c</i>         | 1.04 | 3.10E-03 | 0.021 |
| <i>Stxbp2</i>        | 1.20 | 3.11E-03 | 0.021 |
| <i>Kcp</i>           | 1.19 | 3.11E-03 | 0.021 |
| <i>Rufy2</i>         | 1.06 | 3.12E-03 | 0.021 |
| <i>Prkaa2</i>        | 1.03 | 3.14E-03 | 0.021 |
| <i>Rgs7bp</i>        | 1.05 | 3.15E-03 | 0.021 |
| <i>Slc2a1</i>        | 1.15 | 3.15E-03 | 0.021 |
| <i>Ercc8</i>         | 0.88 | 3.15E-03 | 0.021 |
| <i>Gab1</i>          | 1.08 | 3.15E-03 | 0.021 |
| <i>Wnt2b</i>         | 1.15 | 3.15E-03 | 0.021 |
| <i>R3hdm1</i>        | 1.08 | 3.16E-03 | 0.021 |
| <i>Rpl30</i>         | 0.86 | 3.16E-03 | 0.021 |
| <i>Fabp5</i>         | 0.98 | 3.17E-03 | 0.021 |
| <i>Pfn1</i>          | 0.99 | 3.17E-03 | 0.021 |
| <i>E230016M11Rik</i> | 1.41 | 3.18E-03 | 0.021 |
| <i>Mccc2</i>         | 0.89 | 3.18E-03 | 0.021 |
| <i>Camk1d</i>        | 1.01 | 3.19E-03 | 0.021 |
| <i>Ercc1</i>         | 0.90 | 3.20E-03 | 0.021 |
| <i>Zfp382</i>        | 1.13 | 3.20E-03 | 0.021 |
| <i>Yipf5</i>         | 0.93 | 3.20E-03 | 0.021 |
| <i>Dyrk1a</i>        | 1.01 | 3.22E-03 | 0.021 |
| <i>Unc5c</i>         | 1.06 | 3.23E-03 | 0.021 |
| <i>Dctn6</i>         | 0.99 | 3.24E-03 | 0.021 |
| <i>Gapvd1</i>        | 1.02 | 3.25E-03 | 0.021 |
| <i>Fam96b</i>        | 0.98 | 3.25E-03 | 0.021 |
| <i>Umps</i>          | 0.88 | 3.26E-03 | 0.021 |
| <i>Huwe1</i>         | 1.00 | 3.26E-03 | 0.021 |
| <i>Oxct1</i>         | 0.85 | 3.26E-03 | 0.021 |

|                      |      |          |       |
|----------------------|------|----------|-------|
| <i>Dclk2</i>         | 1.08 | 3.27E-03 | 0.021 |
| <i>Mir682</i>        | 0.93 | 3.27E-03 | 0.021 |
| <i>Zfp597</i>        | 1.02 | 3.28E-03 | 0.021 |
| <i>Dgke</i>          | 1.06 | 3.28E-03 | 0.021 |
| <i>Ep300</i>         | 1.07 | 3.28E-03 | 0.021 |
| <i>Vps29</i>         | 0.98 | 3.28E-03 | 0.021 |
| <i>Nfatc4</i>        | 1.16 | 3.29E-03 | 0.021 |
| <i>Pear1</i>         | 1.22 | 3.30E-03 | 0.021 |
| <i>Pigf</i>          | 0.89 | 3.31E-03 | 0.022 |
| <i>Fam160a2</i>      | 0.97 | 3.31E-03 | 0.022 |
| <i>Dmxl2</i>         | 1.03 | 3.32E-03 | 0.022 |
| <i>Noc4l</i>         | 0.86 | 3.33E-03 | 0.022 |
| <i>Atad2b</i>        | 1.07 | 3.34E-03 | 0.022 |
| <i>Ankrd54</i>       | 0.88 | 3.34E-03 | 0.022 |
| <i>Nif3l1</i>        | 0.93 | 3.36E-03 | 0.022 |
| <i>Pmm1</i>          | 0.93 | 3.36E-03 | 0.022 |
| <i>Ormdl1</i>        | 0.92 | 3.37E-03 | 0.022 |
| <i>Adi1</i>          | 0.88 | 3.37E-03 | 0.022 |
| <i>Klhl20</i>        | 1.10 | 3.39E-03 | 0.022 |
| <i>Al837181</i>      | 0.94 | 3.39E-03 | 0.022 |
| <i>Vps37a</i>        | 1.04 | 3.39E-03 | 0.022 |
| <i>Mpst</i>          | 0.92 | 3.40E-03 | 0.022 |
| <i>Mrpl13</i>        | 0.95 | 3.42E-03 | 0.022 |
| <i>Yars2</i>         | 0.88 | 3.42E-03 | 0.022 |
| <i>Hadha</i>         | 0.91 | 3.42E-03 | 0.022 |
| <i>Hist3h2ba</i>     | 0.92 | 3.43E-03 | 0.022 |
| <i>Gpatch8</i>       | 1.07 | 3.43E-03 | 0.022 |
| <i>Stc2</i>          | 0.75 | 3.43E-03 | 0.022 |
| <i>Zfp358</i>        | 0.94 | 3.43E-03 | 0.022 |
| <i>Cpsf6</i>         | 1.10 | 3.44E-03 | 0.022 |
| <i>Rcan1</i>         | 0.88 | 3.46E-03 | 0.022 |
| <i>Slc12a6</i>       | 1.02 | 3.46E-03 | 0.022 |
| <i>Tanc1</i>         | 1.06 | 3.46E-03 | 0.022 |
| <i>Mt3</i>           | 0.91 | 3.47E-03 | 0.022 |
| <i>A330023F24Rik</i> | 1.10 | 3.48E-03 | 0.022 |
| <i>Sfi1</i>          | 1.15 | 3.48E-03 | 0.022 |
| <i>Tmem67</i>        | 1.12 | 3.47E-03 | 0.022 |
| <i>Bmp5</i>          | 1.33 | 3.47E-03 | 0.022 |
| <i>Map3k1</i>        | 1.01 | 3.49E-03 | 0.022 |
| <i>Rpl38</i>         | 0.88 | 3.49E-03 | 0.022 |
| <i>Ankrd61</i>       | 1.53 | 3.49E-03 | 0.022 |
| <i>Pkd2</i>          | 1.05 | 3.50E-03 | 0.022 |
| <i>Nat14</i>         | 0.89 | 3.51E-03 | 0.022 |
| <i>Wwtr1</i>         | 1.08 | 3.52E-03 | 0.022 |
| <i>Prr12</i>         | 1.02 | 3.52E-03 | 0.023 |
| <i>Samm50</i>        | 0.94 | 3.53E-03 | 0.023 |
| <i>Kcnj6</i>         | 1.17 | 3.53E-03 | 0.023 |
| <i>Pef1</i>          | 0.90 | 3.53E-03 | 0.023 |
| <i>Dpy19l4</i>       | 1.14 | 3.53E-03 | 0.023 |

|                      |      |          |       |
|----------------------|------|----------|-------|
| <i>Med12l</i>        | 1.03 | 3.54E-03 | 0.023 |
| <i>Creld2</i>        | 0.90 | 3.54E-03 | 0.023 |
| <i>Pigs</i>          | 0.89 | 3.55E-03 | 0.023 |
| <i>Zfyve19</i>       | 0.90 | 3.55E-03 | 0.023 |
| <i>Dnajb11</i>       | 0.90 | 3.56E-03 | 0.023 |
| <i>Coro1a</i>        | 0.90 | 3.56E-03 | 0.023 |
| <i>Bex2</i>          | 0.96 | 3.56E-03 | 0.023 |
| <i>Gtf3a</i>         | 0.94 | 3.57E-03 | 0.023 |
| <i>Arl1</i>          | 0.95 | 3.59E-03 | 0.023 |
| <i>Ptcd2</i>         | 0.93 | 3.59E-03 | 0.023 |
| <i>Ddx17</i>         | 1.08 | 3.59E-03 | 0.023 |
| <i>Nfia</i>          | 1.13 | 3.59E-03 | 0.023 |
| <i>Mapk1ip1l</i>     | 1.06 | 3.60E-03 | 0.023 |
| <i>Zyg11b</i>        | 0.98 | 3.60E-03 | 0.023 |
| <i>Rabac1</i>        | 0.89 | 3.61E-03 | 0.023 |
| <i>Scp2</i>          | 0.91 | 3.61E-03 | 0.023 |
| <i>Map1b</i>         | 1.04 | 3.61E-03 | 0.023 |
| <i>Kcnq2</i>         | 1.01 | 3.63E-03 | 0.023 |
| <i>Pdap1</i>         | 0.92 | 3.63E-03 | 0.023 |
| <i>Mpp7</i>          | 1.07 | 3.64E-03 | 0.023 |
| <i>Rhof</i>          | 0.81 | 3.64E-03 | 0.023 |
| <i>Abcb1a</i>        | 1.07 | 3.66E-03 | 0.023 |
| <i>Ciita</i>         | 1.30 | 3.67E-03 | 0.023 |
| <i>Akap8l</i>        | 1.13 | 3.67E-03 | 0.023 |
| <i>Vegfa</i>         | 1.10 | 3.68E-03 | 0.023 |
| <i>Zfp532</i>        | 1.06 | 3.67E-03 | 0.023 |
| <i>Ncoa2</i>         | 1.00 | 3.68E-03 | 0.023 |
| <i>Eya3</i>          | 1.06 | 3.69E-03 | 0.023 |
| <i>Surf1</i>         | 0.93 | 3.71E-03 | 0.023 |
| <i>Wdr86</i>         | 1.28 | 3.71E-03 | 0.023 |
| <i>Il17ra</i>        | 1.12 | 3.71E-03 | 0.023 |
| <i>2900011008Rik</i> | 0.88 | 3.71E-03 | 0.023 |
| <i>Secisbp2l</i>     | 1.00 | 3.72E-03 | 0.023 |
| <i>Rfx7</i>          | 1.05 | 3.72E-03 | 0.023 |
| <i>Tgs1</i>          | 1.09 | 3.73E-03 | 0.023 |
| <i>Cuedc2</i>        | 0.91 | 3.73E-03 | 0.023 |
| <i>Bcl10</i>         | 0.92 | 3.73E-03 | 0.023 |
| <i>Col2a1</i>        | 1.18 | 3.75E-03 | 0.023 |
| <i>Fzd1</i>          | 1.13 | 3.78E-03 | 0.024 |
| <i>Dcn</i>           | 1.40 | 3.78E-03 | 0.024 |
| <i>Aplnr</i>         | 1.30 | 3.79E-03 | 0.024 |
| <i>Dgkh</i>          | 1.16 | 3.79E-03 | 0.024 |
| <i>Gde1</i>          | 0.91 | 3.79E-03 | 0.024 |
| <i>Mylk</i>          | 1.11 | 3.81E-03 | 0.024 |
| <i>Stoml2</i>        | 0.93 | 3.81E-03 | 0.024 |
| <i>Loxl1</i>         | 1.21 | 3.83E-03 | 0.024 |
| <i>Plekha6</i>       | 1.08 | 3.84E-03 | 0.024 |
| <i>Olig1</i>         | 0.79 | 3.84E-03 | 0.024 |
| <i>Dclre1c</i>       | 1.10 | 3.85E-03 | 0.024 |

|                 |      |          |       |
|-----------------|------|----------|-------|
| <i>Noa1</i>     | 0.91 | 3.86E-03 | 0.024 |
| <i>Gm14164</i>  | 1.40 | 3.86E-03 | 0.024 |
| <i>Cmss1</i>    | 0.88 | 3.86E-03 | 0.024 |
| <i>Strn</i>     | 1.07 | 3.87E-03 | 0.024 |
| <i>Notch3</i>   | 1.05 | 3.90E-03 | 0.024 |
| <i>Psmal1</i>   | 0.97 | 3.91E-03 | 0.024 |
| <i>Sp1</i>      | 1.06 | 3.92E-03 | 0.024 |
| <i>Rrbp1</i>    | 1.08 | 3.92E-03 | 0.024 |
| <i>Atxn1l</i>   | 1.01 | 3.92E-03 | 0.024 |
| <i>Zcchc17</i>  | 0.94 | 3.92E-03 | 0.024 |
| <i>Cox20</i>    | 1.32 | 3.93E-03 | 0.024 |
| <i>Vldlr</i>    | 1.02 | 3.93E-03 | 0.024 |
| <i>St8sia2</i>  | 1.08 | 3.93E-03 | 0.024 |
| <i>Plekhg3</i>  | 1.18 | 3.95E-03 | 0.024 |
| <i>Eml6</i>     | 1.08 | 3.96E-03 | 0.024 |
| <i>Tmem70</i>   | 0.93 | 3.97E-03 | 0.025 |
| <i>Ndufs6</i>   | 0.92 | 3.97E-03 | 0.025 |
| <i>Adamts6</i>  | 1.15 | 3.99E-03 | 0.025 |
| <i>Slc35c2</i>  | 0.88 | 3.98E-03 | 0.025 |
| <i>Ermap</i>    | 1.31 | 3.98E-03 | 0.025 |
| <i>Slc6a6</i>   | 1.03 | 3.98E-03 | 0.025 |
| <i>Cyth2</i>    | 0.91 | 3.98E-03 | 0.025 |
| <i>Klf13</i>    | 1.05 | 3.99E-03 | 0.025 |
| <i>Smpd1</i>    | 0.88 | 3.99E-03 | 0.025 |
| <i>Rpl14</i>    | 0.95 | 3.98E-03 | 0.025 |
| <i>Sqstm1</i>   | 0.90 | 3.99E-03 | 0.025 |
| <i>Plekha5</i>  | 1.06 | 4.01E-03 | 0.025 |
| <i>Atxn7</i>    | 1.05 | 4.02E-03 | 0.025 |
| <i>Pdcd6ip</i>  | 1.03 | 4.02E-03 | 0.025 |
| <i>Tab3</i>     | 1.03 | 4.02E-03 | 0.025 |
| <i>Usp39</i>    | 0.91 | 4.03E-03 | 0.025 |
| <i>Msrbb3</i>   | 1.16 | 4.04E-03 | 0.025 |
| <i>Spcs1</i>    | 0.95 | 4.05E-03 | 0.025 |
| <i>Napa</i>     | 0.93 | 4.05E-03 | 0.025 |
| <i>Hdhd2</i>    | 0.87 | 4.07E-03 | 0.025 |
| <i>Fkbp14</i>   | 1.12 | 4.07E-03 | 0.025 |
| <i>Usp1</i>     | 0.90 | 4.07E-03 | 0.025 |
| <i>Snx18</i>    | 1.04 | 4.08E-03 | 0.025 |
| <i>Yif1a</i>    | 0.87 | 4.09E-03 | 0.025 |
| <i>Srrm4</i>    | 1.09 | 4.09E-03 | 0.025 |
| <i>Klf3</i>     | 1.14 | 4.11E-03 | 0.025 |
| <i>Chd4</i>     | 1.06 | 4.12E-03 | 0.025 |
| <i>Bnip1</i>    | 0.93 | 4.13E-03 | 0.025 |
| <i>Pclo</i>     | 1.02 | 4.14E-03 | 0.025 |
| <i>Mrpl14</i>   | 0.95 | 4.14E-03 | 0.025 |
| <i>Enah</i>     | 1.06 | 4.16E-03 | 0.025 |
| <i>Slc30a10</i> | 1.04 | 4.15E-03 | 0.025 |
| <i>Rapgef6</i>  | 1.09 | 4.16E-03 | 0.025 |
| <i>Amer2</i>    | 1.12 | 4.15E-03 | 0.025 |

|                      |      |          |       |
|----------------------|------|----------|-------|
| <i>Serpind1</i>      | 1.45 | 4.16E-03 | 0.025 |
| <i>Lrch3</i>         | 1.05 | 4.15E-03 | 0.025 |
| <i>Acat3</i>         | 0.84 | 4.16E-03 | 0.025 |
| <i>Mapkap1</i>       | 0.93 | 4.16E-03 | 0.025 |
| <i>Mbnl1</i>         | 1.04 | 4.16E-03 | 0.025 |
| <i>Cldn11</i>        | 1.59 | 4.18E-03 | 0.025 |
| <i>Cpne1</i>         | 1.09 | 4.18E-03 | 0.025 |
| <i>Snrpe</i>         | 0.92 | 4.18E-03 | 0.025 |
| <i>Thoc3</i>         | 0.90 | 4.18E-03 | 0.025 |
| <i>Dkk3</i>          | 1.12 | 4.19E-03 | 0.025 |
| <i>Ndufv3</i>        | 0.91 | 4.19E-03 | 0.025 |
| <i>1700028B04Rik</i> | 0.76 | 4.20E-03 | 0.025 |
| <i>Kcnt2</i>         | 1.13 | 4.22E-03 | 0.026 |
| <i>Phf14</i>         | 1.03 | 4.22E-03 | 0.026 |
| <i>Clock</i>         | 1.05 | 4.23E-03 | 0.026 |
| <i>Cck</i>           | 0.84 | 4.23E-03 | 0.026 |
| <i>Egr1</i>          | 1.13 | 4.25E-03 | 0.026 |
| <i>Txn11</i>         | 0.92 | 4.26E-03 | 0.026 |
| <i>Cox8a</i>         | 0.93 | 4.26E-03 | 0.026 |
| <i>Polr2g</i>        | 0.94 | 4.26E-03 | 0.026 |
| <i>Phospho2</i>      | 0.93 | 4.31E-03 | 0.026 |
| <i>Rpusd1</i>        | 0.92 | 4.31E-03 | 0.026 |
| <i>Emc6</i>          | 0.94 | 4.32E-03 | 0.026 |
| <i>Gmds</i>          | 0.90 | 4.32E-03 | 0.026 |
| <i>Csf1r</i>         | 1.11 | 4.33E-03 | 0.026 |
| <i>Cnbp</i>          | 0.92 | 4.33E-03 | 0.026 |
| <i>Brwd3</i>         | 1.10 | 4.33E-03 | 0.026 |
| <i>Msto1</i>         | 0.88 | 4.34E-03 | 0.026 |
| <i>Fam174a</i>       | 0.85 | 4.36E-03 | 0.026 |
| <i>Rnf170</i>        | 1.10 | 4.36E-03 | 0.026 |
| <i>Zc3hav1</i>       | 1.34 | 4.37E-03 | 0.026 |
| <i>Slc2a10</i>       | 1.35 | 4.38E-03 | 0.026 |
| <i>Ep400</i>         | 1.03 | 4.38E-03 | 0.026 |
| <i>Dctn2</i>         | 0.94 | 4.39E-03 | 0.026 |
| <i>Tpcn1</i>         | 1.07 | 4.39E-03 | 0.026 |
| <i>Ap2a1</i>         | 0.91 | 4.39E-03 | 0.026 |
| <i>Psme2</i>         | 0.89 | 4.41E-03 | 0.026 |
| <i>Fbln1</i>         | 1.14 | 4.42E-03 | 0.026 |
| <i>Gli3</i>          | 1.08 | 4.43E-03 | 0.026 |
| <i>Jkamp</i>         | 0.94 | 4.43E-03 | 0.026 |
| <i>Twsg1</i>         | 1.09 | 4.44E-03 | 0.027 |
| <i>Nubp1</i>         | 0.84 | 4.44E-03 | 0.027 |
| <i>Raph1</i>         | 1.02 | 4.45E-03 | 0.027 |
| <i>Lonrf1</i>        | 1.07 | 4.47E-03 | 0.027 |
| <i>Prpf19</i>        | 0.87 | 4.48E-03 | 0.027 |
| <i>Atp2a2</i>        | 1.05 | 4.48E-03 | 0.027 |
| <i>Dnlz</i>          | 0.88 | 4.48E-03 | 0.027 |
| <i>Foxj2</i>         | 1.05 | 4.49E-03 | 0.027 |
| <i>1700123O20Rik</i> | 0.92 | 4.50E-03 | 0.027 |



|                  |      |          |       |
|------------------|------|----------|-------|
| <i>Rab11fip3</i> | 1.03 | 4.50E-03 | 0.027 |
| <i>Efna3</i>     | 0.91 | 4.50E-03 | 0.027 |
| <i>Rab23</i>     | 1.04 | 4.51E-03 | 0.027 |
| <i>Trappc1</i>   | 0.97 | 4.51E-03 | 0.027 |
| <i>Clptm1l</i>   | 0.91 | 4.51E-03 | 0.027 |
| <i>Gpr19</i>     | 0.87 | 4.51E-03 | 0.027 |
| <i>Zfp511</i>    | 0.95 | 4.51E-03 | 0.027 |
| <i>Cdc42bpb</i>  | 0.99 | 4.53E-03 | 0.027 |
| <i>Znfx1</i>     | 1.00 | 4.53E-03 | 0.027 |
| <i>Dennd3</i>    | 1.12 | 4.54E-03 | 0.027 |
| <i>ldh3a</i>     | 0.90 | 4.54E-03 | 0.027 |
| <i>Sumo1</i>     | 0.98 | 4.55E-03 | 0.027 |
| <i>Qpctl</i>     | 0.88 | 4.55E-03 | 0.027 |
| <i>Mocs2</i>     | 0.93 | 4.57E-03 | 0.027 |
| <i>Slc6a17</i>   | 1.01 | 4.58E-03 | 0.027 |
| <i>Urm1</i>      | 0.87 | 4.58E-03 | 0.027 |
| <i>Ddx19b</i>    | 0.99 | 4.59E-03 | 0.027 |
| <i>Coro7</i>     | 1.11 | 4.60E-03 | 0.027 |
| <i>Eral1</i>     | 0.88 | 4.61E-03 | 0.027 |
| <i>Rpl27</i>     | 0.95 | 4.62E-03 | 0.027 |
| <i>Gstp2</i>     | 0.92 | 4.64E-03 | 0.027 |
| <i>Pgam5</i>     | 0.91 | 4.65E-03 | 0.027 |
| <i>Rpl22l1</i>   | 0.87 | 4.65E-03 | 0.027 |
| <i>Fahd1</i>     | 0.87 | 4.68E-03 | 0.027 |
| <i>Pdrg1</i>     | 0.94 | 4.68E-03 | 0.027 |
| <i>Usp5</i>      | 0.92 | 4.68E-03 | 0.027 |
| <i>Catsperg1</i> | 1.35 | 4.68E-03 | 0.028 |
| <i>Abca2</i>     | 1.00 | 4.69E-03 | 0.028 |
| <i>Jag1</i>      | 1.09 | 4.69E-03 | 0.028 |
| <i>Abca8a</i>    | 1.24 | 4.70E-03 | 0.028 |
| <i>Zc3h15</i>    | 0.95 | 4.70E-03 | 0.028 |
| <i>Itgb3</i>     | 1.13 | 4.71E-03 | 0.028 |
| <i>Fbxo48</i>    | 1.34 | 4.72E-03 | 0.028 |
| <i>Klhl28</i>    | 1.14 | 4.72E-03 | 0.028 |
| <i>Dbnidd1</i>   | 0.90 | 4.72E-03 | 0.028 |
| <i>Utrn</i>      | 0.98 | 4.73E-03 | 0.028 |
| <i>Ptpra</i>     | 0.93 | 4.74E-03 | 0.028 |
| <i>Sema6a</i>    | 1.10 | 4.74E-03 | 0.028 |
| <i>Dnm3</i>      | 1.09 | 4.76E-03 | 0.028 |
| <i>Adh5</i>      | 0.94 | 4.76E-03 | 0.028 |
| <i>Med13l</i>    | 1.05 | 4.76E-03 | 0.028 |
| <i>Rpl10a</i>    | 0.96 | 4.76E-03 | 0.028 |
| <i>Trpm7</i>     | 1.08 | 4.77E-03 | 0.028 |
| <i>Kank3</i>     | 1.10 | 4.78E-03 | 0.028 |
| <i>Sirt2</i>     | 0.96 | 4.79E-03 | 0.028 |
| <i>Pign</i>      | 1.01 | 4.80E-03 | 0.028 |
| <i>Impdh1</i>    | 0.90 | 4.80E-03 | 0.028 |
| <i>Coq2</i>      | 0.93 | 4.81E-03 | 0.028 |
| <i>Rlim</i>      | 1.02 | 4.82E-03 | 0.028 |

|                      |      |          |       |
|----------------------|------|----------|-------|
| <i>Rcsd1</i>         | 1.17 | 4.84E-03 | 0.028 |
| <i>Tenm4</i>         | 1.06 | 4.85E-03 | 0.028 |
| <i>Celf1</i>         | 1.05 | 4.86E-03 | 0.028 |
| <i>Lias</i>          | 0.93 | 4.88E-03 | 0.028 |
| <i>Gm1673</i>        | 0.94 | 4.89E-03 | 0.028 |
| <i>Cmklr1</i>        | 1.19 | 4.90E-03 | 0.028 |
| <i>2310061I04Rik</i> | 0.94 | 4.90E-03 | 0.028 |
| <i>L1cam</i>         | 1.08 | 4.90E-03 | 0.028 |
| <i>Capn10</i>        | 0.85 | 4.91E-03 | 0.028 |
| <i>Ranbp3</i>        | 0.90 | 4.93E-03 | 0.029 |
| <i>Rps6</i>          | 0.95 | 4.93E-03 | 0.029 |
| <i>1110065P20Rik</i> | 0.88 | 4.94E-03 | 0.029 |
| <i>Sccpdh</i>        | 0.91 | 4.97E-03 | 0.029 |
| <i>Psm2</i>          | 0.94 | 4.97E-03 | 0.029 |
| <i>Cpne3</i>         | 1.06 | 4.97E-03 | 0.029 |
| <i>Zkscan1</i>       | 1.02 | 4.98E-03 | 0.029 |
| <i>Nsg1</i>          | 0.93 | 5.00E-03 | 0.029 |
| <i>Axin2</i>         | 1.14 | 5.02E-03 | 0.029 |
| <i>Ankrd16</i>       | 1.17 | 5.02E-03 | 0.029 |
| <i>Ireb2</i>         | 1.06 | 5.03E-03 | 0.029 |
| <i>Gria1</i>         | 1.04 | 5.03E-03 | 0.029 |
| <i>Mrps33</i>        | 0.92 | 5.03E-03 | 0.029 |
| <i>Ogfod3</i>        | 0.87 | 5.05E-03 | 0.029 |
| <i>Triqk</i>         | 0.90 | 5.06E-03 | 0.029 |
| <i>Fnta</i>          | 0.92 | 5.07E-03 | 0.029 |
| <i>Aars2</i>         | 0.85 | 5.09E-03 | 0.029 |
| <i>Irf2bp2</i>       | 1.09 | 5.09E-03 | 0.029 |
| <i>Klhl15</i>        | 1.09 | 5.09E-03 | 0.029 |
| <i>Tas1r1</i>        | 1.12 | 5.10E-03 | 0.029 |
| <i>Strn4</i>         | 0.92 | 5.10E-03 | 0.029 |
| <i>Mob3b</i>         | 1.17 | 5.11E-03 | 0.029 |
| <i>Brk1</i>          | 0.97 | 5.11E-03 | 0.029 |
| <i>Dip2a</i>         | 1.01 | 5.13E-03 | 0.029 |
| <i>Sf3b5</i>         | 0.93 | 5.15E-03 | 0.029 |
| <i>Gtf3c5</i>        | 0.91 | 5.14E-03 | 0.029 |
| <i>Mov10</i>         | 1.14 | 5.14E-03 | 0.029 |
| <i>Uchl1</i>         | 0.94 | 5.14E-03 | 0.029 |
| <i>Herc2</i>         | 0.97 | 5.15E-03 | 0.029 |
| <i>Ppan</i>          | 0.92 | 5.15E-03 | 0.029 |
| <i>Stx8</i>          | 0.84 | 5.19E-03 | 0.030 |
| <i>Mnat1</i>         | 0.87 | 5.20E-03 | 0.030 |
| <i>Rps6ka3</i>       | 1.11 | 5.20E-03 | 0.030 |
| <i>Usp37</i>         | 1.03 | 5.21E-03 | 0.030 |
| <i>Prkg1</i>         | 1.05 | 5.22E-03 | 0.030 |
| <i>Slit2</i>         | 1.04 | 5.23E-03 | 0.030 |
| <i>Ppp2ca</i>        | 0.95 | 5.23E-03 | 0.030 |
| <i>Csmd1</i>         | 1.00 | 5.24E-03 | 0.030 |
| <i>B3galt6</i>       | 0.89 | 5.26E-03 | 0.030 |
| <i>Rtn2</i>          | 0.92 | 5.26E-03 | 0.030 |

|                      |      |          |       |
|----------------------|------|----------|-------|
| <i>Pggt1b</i>        | 1.14 | 5.26E-03 | 0.030 |
| <i>B4galt1</i>       | 1.13 | 5.27E-03 | 0.030 |
| <i>Nrxn1</i>         | 1.07 | 5.28E-03 | 0.030 |
| <i>Myo1c</i>         | 1.05 | 5.28E-03 | 0.030 |
| <i>Grn</i>           | 1.12 | 5.28E-03 | 0.030 |
| <i>Rgcc</i>          | 0.85 | 5.31E-03 | 0.030 |
| <i>Elp4</i>          | 0.88 | 5.31E-03 | 0.030 |
| <i>Myo9b</i>         | 1.09 | 5.33E-03 | 0.030 |
| <i>Bcas2</i>         | 0.99 | 5.35E-03 | 0.030 |
| <i>Zfp266</i>        | 1.07 | 5.36E-03 | 0.030 |
| <i>Map2</i>          | 1.06 | 5.36E-03 | 0.030 |
| <i>Calb1</i>         | 0.86 | 5.36E-03 | 0.030 |
| <i>Ccdc116</i>       | 0.81 | 5.39E-03 | 0.031 |
| <i>Zfp536</i>        | 1.09 | 5.39E-03 | 0.031 |
| <i>Gcdh</i>          | 0.89 | 5.39E-03 | 0.031 |
| <i>Bdp1</i>          | 1.04 | 5.40E-03 | 0.031 |
| <i>Adamts20</i>      | 1.07 | 5.40E-03 | 0.031 |
| <i>Srrm2</i>         | 1.10 | 5.40E-03 | 0.031 |
| <i>Ctns</i>          | 1.09 | 5.43E-03 | 0.031 |
| <i>Mmrn2</i>         | 1.17 | 5.43E-03 | 0.031 |
| <i>Sfxn2</i>         | 1.13 | 5.46E-03 | 0.031 |
| <i>Mrps35</i>        | 0.95 | 5.47E-03 | 0.031 |
| <i>Kdsr</i>          | 1.02 | 5.49E-03 | 0.031 |
| <i>Naca</i>          | 0.82 | 5.50E-03 | 0.031 |
| <i>Mpv17</i>         | 0.94 | 5.51E-03 | 0.031 |
| <i>Nhs12</i>         | 1.09 | 5.51E-03 | 0.031 |
| <i>Mycbp</i>         | 1.20 | 5.52E-03 | 0.031 |
| <i>Astn1</i>         | 1.05 | 5.53E-03 | 0.031 |
| <i>Trap1</i>         | 0.92 | 5.53E-03 | 0.031 |
| <i>Zfp518b</i>       | 1.06 | 5.56E-03 | 0.031 |
| <i>Eif4a1</i>        | 0.90 | 5.57E-03 | 0.031 |
| <i>Larp7</i>         | 0.91 | 5.58E-03 | 0.031 |
| <i>Cep170</i>        | 1.08 | 5.59E-03 | 0.031 |
| <i>Sars2</i>         | 0.84 | 5.59E-03 | 0.031 |
| <i>Arhgef9</i>       | 1.08 | 5.59E-03 | 0.031 |
| <i>Rnaseh2c</i>      | 0.89 | 5.61E-03 | 0.031 |
| <i>Dixdc1</i>        | 1.06 | 5.62E-03 | 0.032 |
| <i>Slc16a6</i>       | 1.13 | 5.63E-03 | 0.032 |
| <i>Abhd4</i>         | 0.90 | 5.63E-03 | 0.032 |
| <i>B230118H07Rik</i> | 0.88 | 5.63E-03 | 0.032 |
| <i>Ube2e1</i>        | 0.95 | 5.64E-03 | 0.032 |
| <i>Tmem33</i>        | 1.01 | 5.64E-03 | 0.032 |
| <i>Nhs11</i>         | 1.05 | 5.65E-03 | 0.032 |
| <i>Adamts3</i>       | 1.12 | 5.65E-03 | 0.032 |
| <i>Snrpa1</i>        | 0.93 | 5.65E-03 | 0.032 |
| <i>Ppig</i>          | 1.05 | 5.66E-03 | 0.032 |
| <i>Tnks1bp1</i>      | 1.05 | 5.66E-03 | 0.032 |
| <i>Rabggtb</i>       | 0.92 | 5.67E-03 | 0.032 |
| <i>Timm8a1</i>       | 0.92 | 5.68E-03 | 0.032 |

|                |      |          |       |
|----------------|------|----------|-------|
| <i>Tbc1d23</i> | 1.10 | 5.69E-03 | 0.032 |
| <i>Dag1</i>    | 1.05 | 5.69E-03 | 0.032 |
| <i>Abca8b</i>  | 1.16 | 5.70E-03 | 0.032 |
| <i>Mbd5</i>    | 1.03 | 5.71E-03 | 0.032 |
| <i>Ahdc1</i>   | 1.03 | 5.71E-03 | 0.032 |
| <i>Nat9</i>    | 0.87 | 5.72E-03 | 0.032 |
| <i>Psmd3</i>   | 0.95 | 5.73E-03 | 0.032 |
| <i>Ctla2a</i>  | 0.74 | 5.75E-03 | 0.032 |
| <i>Pebp1</i>   | 0.91 | 5.75E-03 | 0.032 |
| <i>Pfkl</i>    | 0.86 | 5.75E-03 | 0.032 |
| <i>St8sia5</i> | 0.78 | 5.77E-03 | 0.032 |
| <i>Cxx1a</i>   | 0.94 | 5.77E-03 | 0.032 |
| <i>Malat1</i>  | 1.28 | 5.77E-03 | 0.032 |
| <i>Gdpd3</i>   | 1.47 | 5.79E-03 | 0.032 |
| <i>Ddx6</i>    | 1.03 | 5.80E-03 | 0.032 |
| <i>Pfkp</i>    | 1.21 | 5.80E-03 | 0.032 |
| <i>Dohh</i>    | 0.91 | 5.81E-03 | 0.032 |
| <i>Znhit6</i>  | 0.89 | 5.81E-03 | 0.032 |
| <i>Nosip</i>   | 0.92 | 5.81E-03 | 0.032 |
| <i>Mrps10</i>  | 0.92 | 5.82E-03 | 0.032 |
| <i>Uqcr11</i>  | 0.89 | 5.83E-03 | 0.032 |
| <i>Ccdc88a</i> | 1.07 | 5.83E-03 | 0.032 |
| <i>Setd3</i>   | 0.93 | 5.83E-03 | 0.032 |
| <i>Rasl10b</i> | 0.87 | 5.83E-03 | 0.032 |
| <i>F8a</i>     | 0.87 | 5.84E-03 | 0.032 |
| <i>Pgk1</i>    | 0.87 | 5.86E-03 | 0.032 |
| <i>Atf6b</i>   | 0.90 | 5.87E-03 | 0.032 |
| <i>Numb</i>    | 1.08 | 5.88E-03 | 0.032 |
| <i>Cxx1b</i>   | 0.94 | 5.89E-03 | 0.032 |
| <i>Nek9</i>    | 1.04 | 5.89E-03 | 0.032 |
| <i>Foxo3</i>   | 1.12 | 5.91E-03 | 0.033 |
| <i>Nob1</i>    | 0.92 | 5.91E-03 | 0.033 |
| <i>Cnih2</i>   | 0.94 | 5.93E-03 | 0.033 |
| <i>Tjp2</i>    | 1.05 | 5.93E-03 | 0.033 |
| <i>Rpp30</i>   | 0.92 | 5.93E-03 | 0.033 |
| <i>Pik3ca</i>  | 1.00 | 5.93E-03 | 0.033 |
| <i>Mtf1</i>    | 0.98 | 5.93E-03 | 0.033 |
| <i>Heatr3</i>  | 0.90 | 5.92E-03 | 0.033 |
| <i>Smad6</i>   | 1.23 | 5.95E-03 | 0.033 |
| <i>Zfp462</i>  | 1.09 | 5.96E-03 | 0.033 |
| <i>Plekhm3</i> | 1.00 | 5.98E-03 | 0.033 |
| <i>Rcbtb1</i>  | 1.13 | 5.98E-03 | 0.033 |
| <i>Zfand2b</i> | 0.90 | 6.01E-03 | 0.033 |
| <i>Cnpy3</i>   | 0.91 | 6.01E-03 | 0.033 |
| <i>Ctif</i>    | 1.02 | 6.01E-03 | 0.033 |
| <i>Rhov</i>    | 0.88 | 6.01E-03 | 0.033 |
| <i>Tmem234</i> | 0.99 | 6.02E-03 | 0.033 |
| <i>Zmynd8</i>  | 1.04 | 6.02E-03 | 0.033 |
| <i>Cpox</i>    | 1.10 | 6.04E-03 | 0.033 |

|                      |      |          |       |
|----------------------|------|----------|-------|
| <i>Rac3</i>          | 0.89 | 6.04E-03 | 0.033 |
| <i>Lmtk3</i>         | 1.05 | 6.06E-03 | 0.033 |
| <i>1500011K16Rik</i> | 0.85 | 6.06E-03 | 0.033 |
| <i>Itfg2</i>         | 0.91 | 6.08E-03 | 0.033 |
| <i>Psmb4</i>         | 0.91 | 6.09E-03 | 0.033 |
| <i>Slc35e2</i>       | 1.00 | 6.10E-03 | 0.033 |
| <i>Adcy9</i>         | 1.06 | 6.11E-03 | 0.033 |
| <i>Itga4</i>         | 1.01 | 6.11E-03 | 0.033 |
| <i>Ddx49</i>         | 0.89 | 6.12E-03 | 0.033 |
| <i>H2-M5</i>         | 1.39 | 6.14E-03 | 0.033 |
| <i>Sycp3</i>         | 1.41 | 6.15E-03 | 0.033 |
| <i>Smok4a</i>        | 1.51 | 6.15E-03 | 0.033 |
| <i>Swi5</i>          | 0.98 | 6.15E-03 | 0.033 |
| <i>Creb5</i>         | 1.18 | 6.14E-03 | 0.033 |
| <i>Dlg5</i>          | 0.99 | 6.16E-03 | 0.033 |
| <i>Rtca</i>          | 0.93 | 6.16E-03 | 0.033 |
| <i>Mrpl53</i>        | 0.94 | 6.16E-03 | 0.033 |
| <i>Slc12a2</i>       | 1.08 | 6.16E-03 | 0.033 |
| <i>Rpl23a</i>        | 0.99 | 6.19E-03 | 0.034 |
| <i>Cln8</i>          | 0.86 | 6.19E-03 | 0.034 |
| <i>Pcdhgb7</i>       | 1.08 | 6.22E-03 | 0.034 |
| <i>Acaa2</i>         | 0.93 | 6.22E-03 | 0.034 |
| <i>Ammecr1</i>       | 1.12 | 6.23E-03 | 0.034 |
| <i>Akr7a5</i>        | 0.86 | 6.23E-03 | 0.034 |
| <i>Rab28</i>         | 0.93 | 6.24E-03 | 0.034 |
| <i>Eef2k</i>         | 1.00 | 6.26E-03 | 0.034 |
| <i>Stard8</i>        | 1.06 | 6.26E-03 | 0.034 |
| <i>Ctdspl</i>        | 1.05 | 6.27E-03 | 0.034 |
| <i>Tnpo1</i>         | 1.10 | 6.28E-03 | 0.034 |
| <i>Rab9</i>          | 0.95 | 6.29E-03 | 0.034 |
| <i>Pias1</i>         | 1.09 | 6.30E-03 | 0.034 |
| <i>Zbtb20</i>        | 1.22 | 6.31E-03 | 0.034 |
| <i>Ndr3</i>          | 0.95 | 6.33E-03 | 0.034 |
| <i>Zfp217</i>        | 1.07 | 6.35E-03 | 0.034 |
| <i>Mrps26</i>        | 0.94 | 6.37E-03 | 0.034 |
| <i>Vsig10</i>        | 1.25 | 6.38E-03 | 0.034 |
| <i>Nicn1</i>         | 0.94 | 6.41E-03 | 0.034 |
| <i>Hoxb3</i>         | 0.26 | 6.41E-03 | 0.034 |
| <i>Adprhl2</i>       | 0.91 | 6.42E-03 | 0.035 |
| <i>Ppp1r7</i>        | 0.92 | 6.45E-03 | 0.035 |
| <i>Pde6d</i>         | 0.97 | 6.46E-03 | 0.035 |
| <i>Uggt2</i>         | 1.11 | 6.47E-03 | 0.035 |
| <i>Atg5</i>          | 0.92 | 6.47E-03 | 0.035 |
| <i>Atrx</i>          | 1.08 | 6.48E-03 | 0.035 |
| <i>Ecd</i>           | 0.92 | 6.49E-03 | 0.035 |
| <i>Fez2</i>          | 0.88 | 6.49E-03 | 0.035 |
| <i>Cplx2</i>         | 1.05 | 6.52E-03 | 0.035 |
| <i>Rrp12</i>         | 0.83 | 6.54E-03 | 0.035 |
| <i>Vps41</i>         | 0.94 | 6.58E-03 | 0.035 |

|                      |      |          |       |
|----------------------|------|----------|-------|
| <i>Eln</i>           | 1.15 | 6.57E-03 | 0.035 |
| <i>Ube2h</i>         | 1.05 | 6.57E-03 | 0.035 |
| <i>Dennd2a</i>       | 1.05 | 6.58E-03 | 0.035 |
| <i>C1galt1c1</i>     | 0.91 | 6.58E-03 | 0.035 |
| <i>Arpc4</i>         | 0.91 | 6.59E-03 | 0.035 |
| <i>Rarg</i>          | 1.10 | 6.61E-03 | 0.035 |
| <i>Zbtb6</i>         | 1.06 | 6.61E-03 | 0.035 |
| <i>Iqgap1</i>        | 1.03 | 6.61E-03 | 0.035 |
| <i>Tnfrsf23</i>      | 1.33 | 6.61E-03 | 0.035 |
| <i>Cul2</i>          | 0.91 | 6.62E-03 | 0.035 |
| <i>Ap1g2</i>         | 1.18 | 6.65E-03 | 0.035 |
| <i>Mpi</i>           | 0.93 | 6.65E-03 | 0.035 |
| <i>Dmxl1</i>         | 1.05 | 6.67E-03 | 0.036 |
| <i>Pcdhb22</i>       | 1.13 | 6.69E-03 | 0.036 |
| <i>Ick</i>           | 1.01 | 6.70E-03 | 0.036 |
| <i>Ythdf3</i>        | 1.04 | 6.74E-03 | 0.036 |
| <i>Bod1l</i>         | 1.02 | 6.74E-03 | 0.036 |
| <i>Sez6l</i>         | 1.11 | 6.74E-03 | 0.036 |
| <i>Tpp1</i>          | 1.10 | 6.75E-03 | 0.036 |
| <i>Ece2</i>          | 1.08 | 6.76E-03 | 0.036 |
| <i>Nsmf</i>          | 0.92 | 6.76E-03 | 0.036 |
| <i>Magt1</i>         | 1.04 | 6.76E-03 | 0.036 |
| <i>B130024G19Rik</i> | 1.36 | 6.78E-03 | 0.036 |
| <i>Mettl9</i>        | 0.94 | 6.78E-03 | 0.036 |
| <i>Uqcr10</i>        | 0.90 | 6.78E-03 | 0.036 |
| <i>Arhgef4</i>       | 0.88 | 6.79E-03 | 0.036 |
| <i>P4htm</i>         | 0.84 | 6.79E-03 | 0.036 |
| <i>Doc2g</i>         | 1.34 | 6.82E-03 | 0.036 |
| <i>Ppp1r37</i>       | 0.92 | 6.82E-03 | 0.036 |
| <i>Paip2</i>         | 0.99 | 6.83E-03 | 0.036 |
| <i>Fgfr1l</i>        | 0.86 | 6.84E-03 | 0.036 |
| <i>Ccdc115</i>       | 0.93 | 6.86E-03 | 0.036 |
| <i>Sf3a2</i>         | 0.96 | 6.86E-03 | 0.036 |
| <i>Dlg2</i>          | 1.02 | 6.87E-03 | 0.036 |
| <i>Supt3</i>         | 0.90 | 6.87E-03 | 0.036 |
| <i>Smyd2</i>         | 0.95 | 6.88E-03 | 0.036 |
| <i>Gp1ba</i>         | 1.23 | 6.89E-03 | 0.036 |
| <i>Fam120a</i>       | 1.06 | 6.88E-03 | 0.036 |
| <i>Jmy</i>           | 1.04 | 6.88E-03 | 0.036 |
| <i>C1d</i>           | 0.90 | 6.90E-03 | 0.036 |
| <i>2410089E03Rik</i> | 1.02 | 6.90E-03 | 0.036 |
| <i>Rnd1</i>          | 0.87 | 6.90E-03 | 0.036 |
| <i>Ablim1</i>        | 1.02 | 6.90E-03 | 0.036 |
| <i>Penk</i>          | 0.79 | 6.90E-03 | 0.036 |
| <i>Atg2b</i>         | 0.97 | 6.93E-03 | 0.036 |
| <i>Gstp1</i>         | 0.95 | 6.93E-03 | 0.036 |
| <i>Rbpms</i>         | 1.17 | 6.93E-03 | 0.036 |
| <i>Cbfa2t3</i>       | 1.01 | 6.92E-03 | 0.036 |
| <i>Itga6</i>         | 1.07 | 6.94E-03 | 0.036 |

|                |      |          |       |
|----------------|------|----------|-------|
| <i>Mdm1</i>    | 1.15 | 6.94E-03 | 0.036 |
| <i>Dis3l</i>   | 0.89 | 6.95E-03 | 0.036 |
| <i>Cox11</i>   | 0.90 | 6.95E-03 | 0.036 |
| <i>Trip11</i>  | 1.07 | 6.96E-03 | 0.036 |
| <i>Cpt1a</i>   | 1.08 | 6.97E-03 | 0.037 |
| <i>Cwf19l2</i> | 1.08 | 6.98E-03 | 0.037 |
| <i>Ankrd46</i> | 0.94 | 6.99E-03 | 0.037 |
| <i>Mrpl9</i>   | 0.93 | 7.00E-03 | 0.037 |
| <i>Cramp1l</i> | 1.03 | 7.00E-03 | 0.037 |
| <i>Lrpap1</i>  | 0.91 | 7.03E-03 | 0.037 |
| <i>Dusp11</i>  | 1.07 | 7.03E-03 | 0.037 |
| <i>Rsbn1</i>   | 1.03 | 7.04E-03 | 0.037 |
| <i>Cep19</i>   | 0.92 | 7.05E-03 | 0.037 |
| <i>Cib2</i>    | 0.94 | 7.06E-03 | 0.037 |
| <i>Syne2</i>   | 1.08 | 7.07E-03 | 0.037 |
| <i>Zfc3h1</i>  | 1.11 | 7.08E-03 | 0.037 |
| <i>Vdac2</i>   | 0.95 | 7.11E-03 | 0.037 |
| <i>Alg14</i>   | 0.94 | 7.11E-03 | 0.037 |
| <i>Brd1</i>    | 1.07 | 7.13E-03 | 0.037 |
| <i>Clns1a</i>  | 0.90 | 7.19E-03 | 0.037 |
| <i>Rpa1</i>    | 0.91 | 7.22E-03 | 0.038 |
| <i>Zc3h11a</i> | 1.11 | 7.24E-03 | 0.038 |
| <i>Mrpl28</i>  | 0.93 | 7.23E-03 | 0.038 |
| <i>Dclre1a</i> | 1.08 | 7.24E-03 | 0.038 |
| <i>Psm4</i>    | 0.98 | 7.24E-03 | 0.038 |
| <i>Bckdk</i>   | 0.89 | 7.25E-03 | 0.038 |
| <i>Vdac1</i>   | 0.95 | 7.25E-03 | 0.038 |
| <i>Paics</i>   | 0.93 | 7.26E-03 | 0.038 |
| <i>Pofut1</i>  | 1.06 | 7.28E-03 | 0.038 |
| <i>Rabggta</i> | 0.87 | 7.29E-03 | 0.038 |
| <i>Mef2a</i>   | 1.10 | 7.31E-03 | 0.038 |
| <i>Trerf1</i>  | 1.09 | 7.31E-03 | 0.038 |
| <i>Prkcd</i>   | 1.18 | 7.33E-03 | 0.038 |
| <i>Arid4b</i>  | 1.09 | 7.35E-03 | 0.038 |
| <i>Mfsd5</i>   | 0.92 | 7.36E-03 | 0.038 |
| <i>Jmjd6</i>   | 0.95 | 7.38E-03 | 0.038 |
| <i>Ruvbl2</i>  | 0.92 | 7.38E-03 | 0.038 |
| <i>Nudt3</i>   | 0.96 | 7.38E-03 | 0.038 |
| <i>Pdhx</i>    | 0.91 | 7.39E-03 | 0.038 |
| <i>Rpl23</i>   | 0.97 | 7.40E-03 | 0.038 |
| <i>Scaf4</i>   | 1.11 | 7.42E-03 | 0.038 |
| <i>Npas4</i>   | 1.26 | 7.42E-03 | 0.038 |
| <i>Ddost</i>   | 0.93 | 7.43E-03 | 0.038 |
| <i>Gnb5</i>    | 0.88 | 7.44E-03 | 0.038 |
| <i>Dcaf4</i>   | 0.91 | 7.45E-03 | 0.038 |
| <i>Map7</i>    | 1.13 | 7.46E-03 | 0.038 |
| <i>Arsk</i>    | 1.09 | 7.49E-03 | 0.039 |
| <i>Rasa2</i>   | 1.03 | 7.50E-03 | 0.039 |
| <i>Gnb2</i>    | 0.92 | 7.54E-03 | 0.039 |

|                      |      |          |       |
|----------------------|------|----------|-------|
| <i>Armc8</i>         | 0.87 | 7.55E-03 | 0.039 |
| <i>Trpm4</i>         | 1.10 | 7.56E-03 | 0.039 |
| <i>1700025G04Rik</i> | 0.97 | 7.57E-03 | 0.039 |
| <i>Phactr2</i>       | 1.04 | 7.57E-03 | 0.039 |
| <i>Pklr</i>          | 1.35 | 7.58E-03 | 0.039 |
| <i>Hnrnpul2</i>      | 1.01 | 7.61E-03 | 0.039 |
| <i>Atp11c</i>        | 1.13 | 7.61E-03 | 0.039 |
| <i>Ppif</i>          | 0.93 | 7.62E-03 | 0.039 |
| <i>Gpr182</i>        | 1.26 | 7.63E-03 | 0.039 |
| <i>Clmn</i>          | 1.03 | 7.64E-03 | 0.039 |
| <i>Ankrd10</i>       | 1.11 | 7.64E-03 | 0.039 |
| <i>Ift57</i>         | 0.90 | 7.68E-03 | 0.039 |
| <i>Esco1</i>         | 1.07 | 7.68E-03 | 0.039 |
| <i>Cachd1</i>        | 1.14 | 7.69E-03 | 0.039 |
| <i>Smad7</i>         | 1.05 | 7.71E-03 | 0.039 |
| <i>Pvr</i>           | 1.09 | 7.72E-03 | 0.040 |
| <i>Ptprj</i>         | 1.01 | 7.73E-03 | 0.040 |
| <i>Utp18</i>         | 0.93 | 7.75E-03 | 0.040 |
| <i>Armc6</i>         | 0.89 | 7.75E-03 | 0.040 |
| <i>Dyrk2</i>         | 1.10 | 7.76E-03 | 0.040 |
| <i>Kdm6b</i>         | 1.07 | 7.77E-03 | 0.040 |
| <i>Parp4</i>         | 1.14 | 7.77E-03 | 0.040 |
| <i>Hmax2</i>         | 0.96 | 7.77E-03 | 0.040 |
| <i>Wls</i>           | 1.16 | 7.77E-03 | 0.040 |
| <i>Ddrgk1</i>        | 0.95 | 7.79E-03 | 0.040 |
| <i>C130074G19Rik</i> | 1.21 | 7.81E-03 | 0.040 |
| <i>Tmem9b</i>        | 0.91 | 7.80E-03 | 0.040 |
| <i>Sos2</i>          | 1.02 | 7.82E-03 | 0.040 |
| <i>Plekha1</i>       | 1.15 | 7.82E-03 | 0.040 |
| <i>Med16</i>         | 0.86 | 7.84E-03 | 0.040 |
| <i>Col14a1</i>       | 1.15 | 7.84E-03 | 0.040 |
| <i>Podxl2</i>        | 0.93 | 7.84E-03 | 0.040 |
| <i>Hmgcr</i>         | 0.88 | 7.86E-03 | 0.040 |
| <i>Ppara</i>         | 1.15 | 7.86E-03 | 0.040 |
| <i>Tagap1</i>        | 0.91 | 7.88E-03 | 0.040 |
| <i>Eif2b2</i>        | 0.96 | 7.89E-03 | 0.040 |
| <i>Sh3kbp1</i>       | 1.03 | 7.90E-03 | 0.040 |
| <i>Usp24</i>         | 0.98 | 7.91E-03 | 0.040 |
| <i>Rnf130</i>        | 1.14 | 7.93E-03 | 0.040 |
| <i>Itga5</i>         | 1.12 | 7.94E-03 | 0.040 |
| <i>Tmem65</i>        | 1.05 | 7.95E-03 | 0.040 |
| <i>Elmsan1</i>       | 1.02 | 7.96E-03 | 0.040 |
| <i>Serac1</i>        | 1.06 | 7.96E-03 | 0.040 |
| <i>Tctn2</i>         | 0.89 | 7.98E-03 | 0.040 |
| <i>Mysm1</i>         | 1.08 | 7.99E-03 | 0.040 |
| <i>Slmap</i>         | 1.08 | 8.00E-03 | 0.040 |
| <i>Ddx24</i>         | 0.92 | 8.01E-03 | 0.040 |
| <i>Lama5</i>         | 1.04 | 8.01E-03 | 0.040 |
| <i>Zfp280c</i>       | 1.15 | 8.01E-03 | 0.040 |



|                      |      |          |       |
|----------------------|------|----------|-------|
| <i>Eif4a2</i>        | 0.95 | 8.02E-03 | 0.040 |
| <i>Sptssa</i>        | 0.97 | 8.04E-03 | 0.041 |
| <i>Rps28</i>         | 0.89 | 8.03E-03 | 0.041 |
| <i>Sdhaf2</i>        | 0.90 | 8.03E-03 | 0.041 |
| <i>Dolpp1</i>        | 0.91 | 8.04E-03 | 0.041 |
| <i>Rpusd2</i>        | 1.04 | 8.04E-03 | 0.041 |
| <i>Adipor1</i>       | 0.93 | 8.07E-03 | 0.041 |
| <i>Pank3</i>         | 1.02 | 8.06E-03 | 0.041 |
| <i>Naga</i>          | 1.13 | 8.06E-03 | 0.041 |
| <i>Pan3</i>          | 1.09 | 8.06E-03 | 0.041 |
| <i>Lats2</i>         | 1.08 | 8.08E-03 | 0.041 |
| <i>Morn2</i>         | 0.89 | 8.08E-03 | 0.041 |
| <i>Akt3</i>          | 1.05 | 8.08E-03 | 0.041 |
| <i>Pfkm</i>          | 0.93 | 8.11E-03 | 0.041 |
| <i>Zfp758</i>        | 1.12 | 8.12E-03 | 0.041 |
| <i>Ciapi1</i>        | 0.88 | 8.12E-03 | 0.041 |
| <i>Rps13</i>         | 0.92 | 8.13E-03 | 0.041 |
| <i>Mamdc2</i>        | 1.25 | 8.15E-03 | 0.041 |
| <i>Nsmce4a</i>       | 0.94 | 8.15E-03 | 0.041 |
| <i>Dctd</i>          | 0.89 | 8.16E-03 | 0.041 |
| <i>Zfp180</i>        | 0.93 | 8.16E-03 | 0.041 |
| <i>Pcmt1</i>         | 0.93 | 8.17E-03 | 0.041 |
| <i>Btbd10</i>        | 0.94 | 8.20E-03 | 0.041 |
| <i>Manbal</i>        | 0.94 | 8.22E-03 | 0.041 |
| <i>Gpr26</i>         | 1.15 | 8.22E-03 | 0.041 |
| <i>Dock4</i>         | 1.04 | 8.23E-03 | 0.041 |
| <i>Pmpcb</i>         | 0.94 | 8.25E-03 | 0.041 |
| <i>Fbxo9</i>         | 0.89 | 8.27E-03 | 0.041 |
| <i>Rock2</i>         | 1.03 | 8.29E-03 | 0.041 |
| <i>Fbxo11</i>        | 1.09 | 8.29E-03 | 0.041 |
| <i>Ghitm</i>         | 0.92 | 8.30E-03 | 0.041 |
| <i>Ckb</i>           | 0.94 | 8.31E-03 | 0.041 |
| <i>Ogn</i>           | 1.34 | 8.31E-03 | 0.041 |
| <i>Dfna5</i>         | 0.91 | 8.31E-03 | 0.041 |
| <i>Rnf14</i>         | 0.86 | 8.33E-03 | 0.042 |
| <i>Sdha</i>          | 0.94 | 8.33E-03 | 0.042 |
| <i>Plce1</i>         | 0.99 | 8.34E-03 | 0.042 |
| <i>Tfrc</i>          | 1.16 | 8.35E-03 | 0.042 |
| <i>Prtg</i>          | 1.13 | 8.35E-03 | 0.042 |
| <i>Sys1</i>          | 0.90 | 8.37E-03 | 0.042 |
| <i>Sntb2</i>         | 1.08 | 8.37E-03 | 0.042 |
| <i>Napepld</i>       | 1.08 | 8.38E-03 | 0.042 |
| <i>4930570G19Rik</i> | 1.17 | 8.42E-03 | 0.042 |
| <i>Mtmr14</i>        | 0.89 | 8.44E-03 | 0.042 |
| <i>Tbrg1</i>         | 0.95 | 8.44E-03 | 0.042 |
| <i>Phtf2</i>         | 1.03 | 8.45E-03 | 0.042 |
| <i>Rrp36</i>         | 0.93 | 8.47E-03 | 0.042 |
| <i>Pfn2</i>          | 0.95 | 8.47E-03 | 0.042 |
| <i>Aamdc</i>         | 0.92 | 8.47E-03 | 0.042 |

|                      |      |          |       |
|----------------------|------|----------|-------|
| <i>Ramp3</i>         | 0.84 | 8.49E-03 | 0.042 |
| <i>Ccdc32</i>        | 0.93 | 8.50E-03 | 0.042 |
| <i>Slc16a14</i>      | 1.17 | 8.50E-03 | 0.042 |
| <i>Zfp334</i>        | 1.03 | 8.50E-03 | 0.042 |
| <i>H6pd</i>          | 1.08 | 8.51E-03 | 0.042 |
| <i>Phip</i>          | 1.09 | 8.51E-03 | 0.042 |
| <i>Acad9</i>         | 0.89 | 8.54E-03 | 0.042 |
| <i>Tmem5</i>         | 0.94 | 8.54E-03 | 0.042 |
| <i>Gm20751</i>       | 1.50 | 8.57E-03 | 0.042 |
| <i>Nme3</i>          | 0.91 | 8.57E-03 | 0.042 |
| <i>Phkg2</i>         | 0.92 | 8.57E-03 | 0.042 |
| <i>Eya4</i>          | 1.21 | 8.63E-03 | 0.042 |
| <i>Tspan13</i>       | 0.94 | 8.62E-03 | 0.042 |
| <i>Tbc1d7</i>        | 0.96 | 8.62E-03 | 0.042 |
| <i>Rab13</i>         | 0.86 | 8.62E-03 | 0.042 |
| <i>Tbl1xr1</i>       | 1.01 | 8.63E-03 | 0.042 |
| <i>Vps13d</i>        | 0.96 | 8.63E-03 | 0.042 |
| <i>Steap2</i>        | 0.98 | 8.61E-03 | 0.042 |
| <i>Vamp5</i>         | 1.43 | 8.61E-03 | 0.042 |
| <i>Rpn1</i>          | 0.92 | 8.62E-03 | 0.042 |
| <i>Cmip</i>          | 1.06 | 8.60E-03 | 0.042 |
| <i>Mam12</i>         | 1.03 | 8.60E-03 | 0.042 |
| <i>Ndst3</i>         | 1.06 | 8.66E-03 | 0.043 |
| <i>Ppic</i>          | 1.24 | 8.67E-03 | 0.043 |
| <i>Zic2</i>          | 1.15 | 8.68E-03 | 0.043 |
| <i>Grik2</i>         | 1.09 | 8.69E-03 | 0.043 |
| <i>Kbtbd7</i>        | 1.04 | 8.69E-03 | 0.043 |
| <i>Snn</i>           | 0.92 | 8.73E-03 | 0.043 |
| <i>Smc5</i>          | 1.08 | 8.73E-03 | 0.043 |
| <i>Rabepk</i>        | 0.89 | 8.75E-03 | 0.043 |
| <i>Cdc14a</i>        | 1.14 | 8.79E-03 | 0.043 |
| <i>AY358078</i>      | 0.91 | 8.83E-03 | 0.043 |
| <i>Serp2</i>         | 0.94 | 8.83E-03 | 0.043 |
| <i>Emc1</i>          | 1.02 | 8.83E-03 | 0.043 |
| <i>Rnaset2b</i>      | 0.90 | 8.86E-03 | 0.043 |
| <i>Fkbp9</i>         | 1.10 | 8.86E-03 | 0.043 |
| <i>Prdm2</i>         | 1.02 | 8.87E-03 | 0.043 |
| <i>Commd8</i>        | 0.91 | 8.87E-03 | 0.043 |
| <i>Atp5g3</i>        | 0.94 | 8.93E-03 | 0.044 |
| <i>Sik2</i>          | 1.10 | 8.94E-03 | 0.044 |
| <i>Rpl12</i>         | 0.94 | 8.95E-03 | 0.044 |
| <i>4932438A13Rik</i> | 1.00 | 8.97E-03 | 0.044 |
| <i>Mrpl50</i>        | 0.95 | 8.98E-03 | 0.044 |
| <i>Commd7</i>        | 0.90 | 9.00E-03 | 0.044 |
| <i>Akap2</i>         | 1.07 | 9.00E-03 | 0.044 |
| <i>Stmn2</i>         | 0.93 | 9.01E-03 | 0.044 |
| <i>Sncg</i>          | 0.54 | 9.02E-03 | 0.044 |
| <i>Ftx</i>           | 1.10 | 9.03E-03 | 0.044 |
| <i>Tfpi</i>          | 1.13 | 9.03E-03 | 0.044 |

|                 |      |          |       |
|-----------------|------|----------|-------|
| <i>Prps1l3</i>  | 0.92 | 9.06E-03 | 0.044 |
| <i>Lamp5</i>    | 0.44 | 9.08E-03 | 0.044 |
| <i>Pcx</i>      | 0.84 | 9.10E-03 | 0.044 |
| <i>Emx2</i>     | 1.14 | 9.10E-03 | 0.044 |
| <i>Serf2</i>    | 0.89 | 9.10E-03 | 0.044 |
| <i>Rgs5</i>     | 1.11 | 9.12E-03 | 0.044 |
| <i>Ncoa6</i>    | 1.07 | 9.12E-03 | 0.044 |
| <i>Fastk</i>    | 0.92 | 9.12E-03 | 0.044 |
| <i>Rexo2</i>    | 0.95 | 9.12E-03 | 0.044 |
| <i>Adamtsl3</i> | 1.17 | 9.13E-03 | 0.044 |
| <i>Chd8</i>     | 1.01 | 9.14E-03 | 0.044 |
| <i>Cmpk1</i>    | 0.93 | 9.14E-03 | 0.044 |
| <i>Prkag1</i>   | 0.92 | 9.18E-03 | 0.044 |
| <i>Dbx2</i>     | 0.63 | 9.19E-03 | 0.044 |
| <i>Enpp1</i>    | 1.40 | 9.22E-03 | 0.045 |
| <i>Tek</i>      | 1.07 | 9.22E-03 | 0.045 |
| <i>Rnasel</i>   | 1.11 | 9.25E-03 | 0.045 |
| <i>Aldoart1</i> | 0.83 | 9.28E-03 | 0.045 |
| <i>Tusc3</i>    | 0.94 | 9.27E-03 | 0.045 |
| <i>Map4k2</i>   | 1.17 | 9.28E-03 | 0.045 |
| <i>Stk16</i>    | 0.93 | 9.30E-03 | 0.045 |
| <i>Pot1b</i>    | 1.15 | 9.30E-03 | 0.045 |
| <i>Magi1</i>    | 1.02 | 9.30E-03 | 0.045 |
| <i>Taf12</i>    | 0.96 | 9.31E-03 | 0.045 |
| <i>Zfp148</i>   | 1.02 | 9.32E-03 | 0.045 |
| <i>Mast4</i>    | 1.11 | 9.34E-03 | 0.045 |
| <i>Srek1</i>    | 1.13 | 9.35E-03 | 0.045 |
| <i>Ppp1r1a</i>  | 0.92 | 9.35E-03 | 0.045 |
| <i>Efh2</i>     | 0.90 | 9.35E-03 | 0.045 |
| <i>Kdm5a</i>    | 1.03 | 9.35E-03 | 0.045 |
| <i>Gbp7</i>     | 1.18 | 9.39E-03 | 0.045 |
| <i>Limk1</i>    | 0.92 | 9.40E-03 | 0.045 |
| <i>Poll</i>     | 0.85 | 9.42E-03 | 0.045 |
| <i>Zfp809</i>   | 1.17 | 9.43E-03 | 0.045 |
| <i>Dab1</i>     | 1.11 | 9.44E-03 | 0.045 |
| <i>Ddx39</i>    | 0.87 | 9.44E-03 | 0.045 |
| <i>Rnf32</i>    | 0.91 | 9.46E-03 | 0.045 |
| <i>Mmp14</i>    | 1.13 | 9.47E-03 | 0.045 |
| <i>Ccdc171</i>  | 1.17 | 9.47E-03 | 0.045 |
| <i>Card6</i>    | 1.18 | 9.48E-03 | 0.045 |
| <i>Kif21a</i>   | 1.03 | 9.49E-03 | 0.046 |
| <i>Atp8a1</i>   | 1.04 | 9.52E-03 | 0.046 |
| <i>Abhd11</i>   | 0.94 | 9.55E-03 | 0.046 |
| <i>Tub</i>      | 1.01 | 9.56E-03 | 0.046 |
| <i>Cadm1</i>    | 1.08 | 9.56E-03 | 0.046 |
| <i>Elp6</i>     | 0.86 | 9.56E-03 | 0.046 |
| <i>Bod1</i>     | 0.94 | 9.57E-03 | 0.046 |
| <i>Ergic1</i>   | 0.95 | 9.57E-03 | 0.046 |
| <i>Angptl6</i>  | 0.85 | 9.59E-03 | 0.046 |

|                      |      |          |       |
|----------------------|------|----------|-------|
| <i>Lin52</i>         | 0.90 | 9.62E-03 | 0.046 |
| <i>Pdhb</i>          | 0.97 | 9.62E-03 | 0.046 |
| <i>Abca5</i>         | 1.04 | 9.63E-03 | 0.046 |
| <i>Xrcc5</i>         | 0.87 | 9.66E-03 | 0.046 |
| <i>Bad</i>           | 0.92 | 9.66E-03 | 0.046 |
| <i>Fzd5</i>          | 1.11 | 9.68E-03 | 0.046 |
| <i>Ppp1r3f</i>       | 0.85 | 9.68E-03 | 0.046 |
| <i>Fzd8</i>          | 1.10 | 9.73E-03 | 0.046 |
| <i>Tmem2</i>         | 1.07 | 9.73E-03 | 0.046 |
| <i>L3mbtl2</i>       | 0.89 | 9.74E-03 | 0.046 |
| <i>Tomt</i>          | 0.91 | 9.76E-03 | 0.046 |
| <i>Tspan3</i>        | 0.93 | 9.77E-03 | 0.046 |
| <i>Fam227a</i>       | 1.06 | 9.77E-03 | 0.047 |
| <i>Bax</i>           | 0.95 | 9.79E-03 | 0.047 |
| <i>Adarb2</i>        | 1.04 | 9.80E-03 | 0.047 |
| <i>Dgka</i>          | 1.14 | 9.82E-03 | 0.047 |
| <i>Thra</i>          | 0.95 | 9.82E-03 | 0.047 |
| <i>Sap30bp</i>       | 0.93 | 9.82E-03 | 0.047 |
| <i>Thbs3</i>         | 1.19 | 9.82E-03 | 0.047 |
| <i>Hist1h2bc</i>     | 0.88 | 9.85E-03 | 0.047 |
| <i>1110008P14Rik</i> | 0.90 | 9.85E-03 | 0.047 |
| <i>Rab2a</i>         | 0.97 | 9.85E-03 | 0.047 |
| <i>Ociad1</i>        | 0.92 | 9.84E-03 | 0.047 |
| <i>Sirt1</i>         | 1.12 | 9.86E-03 | 0.047 |
| <i>Gnpda1</i>        | 1.11 | 9.86E-03 | 0.047 |
| <i>1700028K03Rik</i> | 1.25 | 9.87E-03 | 0.047 |
| <i>Eml4</i>          | 1.05 | 9.87E-03 | 0.047 |
| <i>Ttc28</i>         | 1.13 | 9.87E-03 | 0.047 |
| <i>0610009O20Rik</i> | 0.90 | 9.89E-03 | 0.047 |
| <i>Glud1</i>         | 0.90 | 9.90E-03 | 0.047 |
| <i>Fuca1</i>         | 0.90 | 9.91E-03 | 0.047 |
| <i>Znrf3</i>         | 1.02 | 9.92E-03 | 0.047 |
| <i>Pten</i>          | 0.99 | 9.95E-03 | 0.047 |
| <i>Slc39a14</i>      | 1.03 | 9.97E-03 | 0.047 |
| <i>Cdc37l1</i>       | 1.08 | 9.98E-03 | 0.047 |
| <i>Slc25a27</i>      | 1.08 | 1.00E-02 | 0.047 |
| <i>Ccdc14</i>        | 1.07 | 1.00E-02 | 0.047 |
| <i>Nrbp2</i>         | 1.16 | 1.00E-02 | 0.047 |
| <i>Impad1</i>        | 1.04 | 1.01E-02 | 0.047 |
| <i>Slc38a4</i>       | 1.22 | 1.01E-02 | 0.047 |
| <i>Hoxa3</i>         | 0.24 | 1.01E-02 | 0.047 |
| <i>Btaf1</i>         | 1.10 | 1.01E-02 | 0.048 |
| <i>Katnb1</i>        | 0.90 | 1.01E-02 | 0.048 |
| <i>Ubtd1</i>         | 0.86 | 1.01E-02 | 0.048 |
| <i>Il6ra</i>         | 1.26 | 1.01E-02 | 0.048 |
| <i>Eogt</i>          | 1.12 | 1.01E-02 | 0.048 |
| <i>Mrpl48</i>        | 0.88 | 1.01E-02 | 0.048 |
| <i>4930447C04Rik</i> | 1.32 | 1.01E-02 | 0.048 |
| <i>Nmt1</i>          | 0.95 | 1.02E-02 | 0.048 |

|                  |      |          |       |
|------------------|------|----------|-------|
| <i>Cycs</i>      | 0.87 | 1.02E-02 | 0.048 |
| <i>Kat6a</i>     | 1.03 | 1.02E-02 | 0.048 |
| <i>Bphl</i>      | 0.92 | 1.02E-02 | 0.048 |
| <i>Vmp1</i>      | 0.90 | 1.02E-02 | 0.048 |
| <i>Enpep</i>     | 1.36 | 1.02E-02 | 0.048 |
| <i>Ndp</i>       | 0.83 | 1.02E-02 | 0.048 |
| <i>Polr1d</i>    | 0.93 | 1.03E-02 | 0.048 |
| <i>Plxnc1</i>    | 1.04 | 1.03E-02 | 0.048 |
| <i>Shisa6</i>    | 1.03 | 1.03E-02 | 0.048 |
| <i>Dbn1</i>      | 0.94 | 1.03E-02 | 0.048 |
| <i>Rmnd5a</i>    | 1.00 | 1.03E-02 | 0.048 |
| <i>Atn1</i>      | 1.06 | 1.03E-02 | 0.048 |
| <i>Nsmce1</i>    | 0.91 | 1.03E-02 | 0.048 |
| <i>Rpl18a</i>    | 0.96 | 1.03E-02 | 0.048 |
| <i>Wisp1</i>     | 1.37 | 1.03E-02 | 0.048 |
| <i>Phpt1</i>     | 0.95 | 1.04E-02 | 0.048 |
| <i>Ncaph2</i>    | 0.91 | 1.04E-02 | 0.048 |
| <i>Ggta1</i>     | 1.09 | 1.04E-02 | 0.048 |
| <i>Pi4k2b</i>    | 1.12 | 1.04E-02 | 0.048 |
| <i>Cend1</i>     | 0.83 | 1.04E-02 | 0.048 |
| <i>Ccdc15</i>    | 1.13 | 1.04E-02 | 0.048 |
| <i>Nsfl1c</i>    | 0.97 | 1.04E-02 | 0.048 |
| <i>Ptpdc1</i>    | 1.05 | 1.04E-02 | 0.049 |
| <i>Trim12c</i>   | 1.13 | 1.04E-02 | 0.049 |
| <i>Rpe</i>       | 0.88 | 1.05E-02 | 0.049 |
| <i>Pole4</i>     | 0.93 | 1.05E-02 | 0.049 |
| <i>Scn9a</i>     | 1.10 | 1.05E-02 | 0.049 |
| <i>Kcnh5</i>     | 1.14 | 1.05E-02 | 0.049 |
| <i>Cadm2</i>     | 1.05 | 1.05E-02 | 0.049 |
| <i>Kidins220</i> | 1.02 | 1.05E-02 | 0.049 |
| <i>Adamts1</i>   | 1.07 | 1.05E-02 | 0.049 |
| <i>H2-T23</i>    | 1.35 | 1.05E-02 | 0.049 |
| <i>Ccdc24</i>    | 1.19 | 1.05E-02 | 0.049 |
| <i>Zscan29</i>   | 1.08 | 1.05E-02 | 0.049 |
| <i>Samd4</i>     | 1.07 | 1.05E-02 | 0.049 |
| <i>Efna5</i>     | 1.07 | 1.05E-02 | 0.049 |
| <i>Tmbim4</i>    | 0.95 | 1.05E-02 | 0.049 |
| <i>Avl9</i>      | 1.02 | 1.06E-02 | 0.049 |
| <i>Helz2</i>     | 1.10 | 1.06E-02 | 0.049 |
| <i>Kcnh4</i>     | 1.09 | 1.06E-02 | 0.049 |
| <i>Abca4</i>     | 1.20 | 1.06E-02 | 0.049 |
| <i>Ift20</i>     | 0.99 | 1.06E-02 | 0.049 |
| <i>Mfap3</i>     | 1.01 | 1.06E-02 | 0.049 |
| <i>Tgfb3</i>     | 1.12 | 1.06E-02 | 0.049 |
| <i>Angpt2</i>    | 1.21 | 1.06E-02 | 0.049 |
| <i>Fanca</i>     | 1.18 | 1.06E-02 | 0.049 |
| <i>Hs3st3a1</i>  | 1.25 | 1.07E-02 | 0.049 |
| <i>Hgs</i>       | 0.96 | 1.07E-02 | 0.049 |
| <i>Mob2</i>      | 0.92 | 1.07E-02 | 0.049 |

|               |      |          |       |
|---------------|------|----------|-------|
| <i>Tfap2d</i> | 1.33 | 1.07E-02 | 0.050 |
| <i>Polr3d</i> | 0.89 | 1.07E-02 | 0.050 |
| <i>Bicd1</i>  | 1.07 | 1.07E-02 | 0.050 |
| <i>Tnk2</i>   | 1.04 | 1.08E-02 | 0.050 |
| <i>Bche</i>   | 1.17 | 1.08E-02 | 0.050 |
| <i>Ryr1</i>   | 0.99 | 1.08E-02 | 0.050 |
| <i>Aig1</i>   | 0.93 | 1.08E-02 | 0.050 |
| <i>Fkbp2</i>  | 0.90 | 1.08E-02 | 0.050 |
| <i>Mrs2</i>   | 1.13 | 1.09E-02 | 0.050 |

**Table S2 - All significantly up-regulated KEGG pathways in Fetal Brain & their associated genes**

| KEGG pathway                                         | Net Enrichment Score | # significant/total genes | Padj   | Gene Name                                                                                                                                                                                                                                                                                                                               |
|------------------------------------------------------|----------------------|---------------------------|--------|-----------------------------------------------------------------------------------------------------------------------------------------------------------------------------------------------------------------------------------------------------------------------------------------------------------------------------------------|
| Complement and coagulation cascades                  | 2.73                 | 13/17                     | 0.0026 | <i>A2m, C3, Cd46, Cfb, Cfh, F13a1, Fga, Fgb, Fgg, Serpind1, Tfp1, Thbd, Vwf</i>                                                                                                                                                                                                                                                         |
| Protein digestion and absorption                     | 2.65                 | 26/31                     | 0.0026 | <i>Atp1a2, Col11a1, Col12a1, Col14a1, Col15a1, Col16a1, Col18a1, Col1a1, Col1a2, Col23a1, Col25a, Col27a1, Col2a1, Col3a1, Col4a1, Col4a2, Col4a5, Col4a6, Col5a1, Col5a2, Col6a1, Col6a2, Col6a3, Dpp4, Eln, Slc7a8</i>                                                                                                                |
| Platelet activation                                  | 2.55                 | 16/21                     | 0.0026 | <i>Adcy6, Col1a1, Col1a2, Col3a1, Fga, Fgb, Ggg, Gp1ba, Gucy1a2, Itga2, Itgb3, Itpr3, Mylk, Rock1, Snap23, Vwf</i>                                                                                                                                                                                                                      |
| ECM-receptor interaction                             | 2.51                 | 34/43                     | 0.0026 | <i>Agrn, Col1a1, Col1a2, Col2a1, Col4a1, Col4a2, Col4a5, Col4a6, Col6a1, Col6a2, Col6a3, Fn1, Frem1, Frem2, Gp1ba, Hspg2, Itga1, Itga11, Itga2, Itga5, Itga6, Itgb3, Lama1, Lama2, Lama4, Lamb1, Lamb2, Lamc1, Lamc3, Reln, Thbs2, Thbs3, Tnr, Vwf</i>                                                                                  |
| Focal adhesion                                       | 2.35                 | 37/48                     | 0.0026 | <i>Col1a1, Col1a2, Col2a1, Col4a1, Col4a2, Col4a5, Col4a6, Col6a1, Col6a2, Col6a3, Flnb, Flnc, Fn1, Igf1r, Itga1, Itga11, Itga2, Itga5, Itgb3, Kdr, Lama1, Lama2, Lamb1, Lamb2, Lamc1, Lamc3, Mylk, Pdgfrb, Pxn, Reln, Rock1, Thbs2, Thbs3, Tnr, Vav3, Vegfa, Vwf</i>                                                                   |
| Hippo signaling pathway                              | 2.34                 | 28/53                     | 0.0026 | <i>Afp, Amot, Apc, Axin2, Bmp5, Fmp6, Bmp7, Bmpr2, Cdh1, Dlg1, Dvl3, Fzd1, Fzd3, Fzd5, Fzd7, Fzd8, Gsk3b, Lats2, Mob1b, Smad3, Tcf7l1, Tead1, Tgfb3, Tgfr2, Trp73, Wnt2b, Wwtr1, Yap1</i>                                                                                                                                               |
| AGE-RAGE signaling pathway in diabetic complications | 2.30                 | 15/19                     | 0.0026 | <i>Col1a1, Col1a2, Col3a1, Col4a1, Col4a2, Col4a5, Col4a6, Egr1, Fn1, Mmp2, Prkcd, Smad3, Tgfb3, Tgfr2, Thbd</i>                                                                                                                                                                                                                        |
| Cytokine-cytokine receptor interaction               | 2.26                 | 15/35                     | 0.0026 | <i>Acvr1c, Bmp5, Bmp6, Bmp7, Bmpr2, Csf1, Csf1r, Cxcl12, Gdf11, Il17ra, Il6ra, Inha, Lepr, Tgfb3, Tgfr2</i>                                                                                                                                                                                                                             |
| Staphylococcus aureus infection                      | 2.25                 | 4/6                       | 0.0071 | <i>C3, Cfb, Cfh, Fgg</i>                                                                                                                                                                                                                                                                                                                |
| Proteoglycans in cancer                              | 2.25                 | 31/44                     | 0.0026 | <i>Ank2, Ank3, Arhgef1, Cbl, Col1a1, Col1a2, Dcn, Erbb4, Flnb, Flnc, Fn1, Fzd1, Fzd3, Fzd5, Fzd7, Fzd8, Gpc3, Hspg2, Igf1r, Ifg2, Itga2, Itga5, Itgb3, Itpr3, Kdr, Mmp2, Pxn, Rock1, Vav3, Vegfa, Wnt2b</i>                                                                                                                             |
| TGF-beta signaling pathway                           | 2.25                 | 23/42                     | 0.0026 | <i>Acvr1b, Acvr1c, Acvr2a, Bmp5, Bmp6, Bmp7, Bmpr2, Chrd, Crebbp, Dcn, Ep300, Fbn1, Fmod, Neo1, Rock1, Smad3, Smad6, Smad7, Smurf2, Sp1, Tgfb3, Tgfr2, Thsd4</i>                                                                                                                                                                        |
| Amoebiasis                                           | 2.23                 | 15/17                     | 0.0026 | <i>Col1a1, Col1a2, Col3a1, Col4a1, Col4a2, Col4a5, Col4a6, Fn1, Lama1, Lama2, Lamb1, Lamb2, Lamc1, Lamc3, Tgfb3</i>                                                                                                                                                                                                                     |
| Neutrophil extracellular trap formation              | 2.05                 | 6/7                       | 0.0026 | <i>C3, Fga, Fgb, Fgg, Gp1ba, Vwf</i>                                                                                                                                                                                                                                                                                                    |
| Human papillomavirus infection                       | 1.99                 | 46/68                     | 0.0026 | <i>Axin2, Col1a1, Col1a2, Col2a1, Col4a1, Col4a2, Col4a5, Col4a6, Col6a1, Col6a2, Col6a3, Creb5, Crebbp, Dvl3, Eif2ak2, Fn1, Fzd1, Fzd3, Fzd5, Fzd7, Fzd8, H2-M5, H2-T23, Itga1, Itga11, Itga2, Itga5, Itgb3, Jag1, Lama1, Lama2, Lamb1, Lamb2, Lamc1, Lamc3, Notch2, Pdgfrb, Pxn, Reln, Tcf7l1, Thbs2, Thbs3, Tnr, Vtn, Vwf, Wnt2b</i> |
| Adherens junction                                    | 1.98                 | 12/22                     | 0.016  | <i>Cdh1, Crebbp, Ctnnd1, Ep300, Igf1r, Insr, Ptprb, Smad3, Sorbs1, Tcf7l1, Tgfr1, Tjp1</i>                                                                                                                                                                                                                                              |
| Basal cell carcinoma                                 | 1.97                 | 12/26                     | 0.016  | <i>Apc, Axin2, Dvl3, Fzd1, Fzd3, Fzd5, Fzd7, Fzd8, Gli3, Gsk3b, Tcf7l1, Wnt2b</i>                                                                                                                                                                                                                                                       |

|                                                          |      |        |        |                                                                                                                                                                                                                                                                                                                                                                                                                                                     |
|----------------------------------------------------------|------|--------|--------|-----------------------------------------------------------------------------------------------------------------------------------------------------------------------------------------------------------------------------------------------------------------------------------------------------------------------------------------------------------------------------------------------------------------------------------------------------|
| Wnt signaling pathway                                    | 1.95 | 24/53  | 0.0026 | <i>Apc, Axin2, Crebbp, Daam1, Dkk2, Dvl3, Ep300, Fzd1, Fzd3, Fzd5, Fzd7, Fzd8, Gsk3b, Lrp5, Lrp6, Nfatc2, Nfatc4, Ror2, Serpinf1, Smad3, Tcf7l1, Vangl2, Wisp1, Wnt2b</i>                                                                                                                                                                                                                                                                           |
| Hematopoietic cell lineage                               | 1.91 | 11/21  | 0.033  | <i>Anpep, Csf1, Csf1r, Gp1ba, Il6ra, Itga1, Itga2, Itga5, Itga6, Itgb3, Tfrc</i>                                                                                                                                                                                                                                                                                                                                                                    |
| PI3K-Akt signaling pathway                               | 1.90 | 47/69  | 0.0026 | <i>Angpt2, Col1a1, Col1a2, Col2a1, Col4a1, Col4a2, Col4a5, Col4a6, Col6a1, Col6a2, Col6a3, Creb5, Csf1, Csf1r, Efna5, Erbb4, Fgfr2, Fn1, Foxo3, Igf1r, Igf2, Il6ra, Insr, Itga1, Itga11, Itga2, Itga5, Itga6, Itgb3, Kdr, Lama1, Lama2, Lama4, Lamb1, Lamb2, Lamc1, Lamc3, Lpar1, Mtcp1, Pdgfrb, Reln, Tek, Thbs2, Thbs3, Tnr, Vtn, Vwf</i>                                                                                                         |
| Arrhythmogenic right ventricular cardiomyopathy          | 1.87 | 15/28  | 0.024  | <i>Cacna1c, Cacna1d, Cacna2d1, Cacnb4, Dsp, Gja1, Itga1, Itga11, Itga2, Itga5, Itga6, Itgb3, Lama1, Lama2, Tcf7l1</i>                                                                                                                                                                                                                                                                                                                               |
| Coronavirus disease - COVID-19                           | 1.86 | 9/15   | 0.0026 | <i>C3, Cfb, Eif2ak2, F13a1, Fga, Fgb, Fgg, Il6ra, Vwf</i>                                                                                                                                                                                                                                                                                                                                                                                           |
| Signaling pathways regulating pluripotency of stem cells | 1.85 | 22/43  | 0.015  | <i>Acvr1b, Acvr1c, Apc, Axin2, Bmpr2, Dvl3, Fgf2, Fzd1, Fzd3, Fzd5, Fzd7, Fzd8, Gsk3b, Igf1r, Jarid2, Pcgf6, Pik3r1, Pik3r3, Rest, Smad3, Wnt2b, Zfhx3</i>                                                                                                                                                                                                                                                                                          |
| Cell adhesion molecules                                  | 1.81 | 19/37  | 0.024  | <i>Cadm1, Cdh1, Cdh4, Cdh5, Cldn1, Cldn11, Cldn19, Glg1, H2-M5, H2-T23, Itga6, Itgav, L1cam, Ncam1, Neo1, Nfasc, Nrcam, Nrxa1, Pvr</i>                                                                                                                                                                                                                                                                                                              |
| MicroRNAs in cancer                                      | 1.70 | 29/63  | 0.024  | <i>Abcb1a, Apc, Apc2, Bcl2, Bmpr2, Crebbp, Cyp1b1, Dicer1, Dnmt3b, Efna5, Ep300, Fzd3, Glis, Itga5, Itgb3, Mdm4, Mmp16, Notch2, Notch3, Pdgfrb, Pik3r1, Pik3r3, Reck, Rock1, Sirt1, Sos1, Tnr, Vegfa, Zeb1</i>                                                                                                                                                                                                                                      |
| Relaxin signaling pathway                                | 1.67 | 10/14  | 0.048  | <i>Col1a1, Col1a2, Col3a1, Col4a1, Col4a2, Col4a5, Col4a6, Creb5, Mmp2, Tgfb2</i>                                                                                                                                                                                                                                                                                                                                                                   |
| Gastric cancer                                           | 1.67 | 23/45  | 0.039  | <i>Abcb1a, Apc, Axin2, Braf, Cdh1, Dvl3, Fgfr2, Fzd1, Fzd3, Fzd5, Fzd7, Fzd8, Gab1, Gsk3b, Lrp5, Lrp6, Pik3r1, Pik3r3, Smad3, Tcf7l1, Tgfb3, Tgfb2, Wnt2b</i>                                                                                                                                                                                                                                                                                       |
| Pathways in cancer                                       | 1.44 | 63/120 | 0.024  | <i>Adcy6, Adcy9, Apc, Arhgef1, Axin2, Braf, Cbl, Cdh1, Col4a1, Col4a2, Col4a5, Col4a6, Crebbp, Csf1r, Cxcl12, Dcc, Dvl3, Ep300, Epas1, Fgfr2, Fn1, Fzd1, Fzd3, Fzd5, Fzd7, Fzd8, Gli3, Gnaq, Gsk3b, Igf1r, Igf2, Il6ra, Itga2, Itga6, Jag1, Kit, Lama1, Lama2, Lama4, Lamb1, Lamb2, Lamc1, Lamc3, Lpar1, Lrp5, Lrp6, Mmp2, Notch2, Notch3, Pdgfrb, Pik3r1, Pik3r3, Pml, Rock1, Runx1t1, Slc2a1, Smad3, Sp1, Tcf7l1, Tgfb3, Tgfb2, Wnt2b, Zbtb16</i> |



**Table S3- All significantly down-regulated KEGG pathways in Fetal Brain and associated genes.**

| KEGG pathway                  | Net Enrichment Score | # significant/total genes | Padj   | Gene Name                                                                                                                                                                                                                                                                                                                                                                                                                                                                                                                                                                                                                                                                                                                                                                |
|-------------------------------|----------------------|---------------------------|--------|--------------------------------------------------------------------------------------------------------------------------------------------------------------------------------------------------------------------------------------------------------------------------------------------------------------------------------------------------------------------------------------------------------------------------------------------------------------------------------------------------------------------------------------------------------------------------------------------------------------------------------------------------------------------------------------------------------------------------------------------------------------------------|
| Oxidative phosphorylation     | -2.61                | 63/69                     | 0.0026 | <i>Atp5a1, Atp5b, Atp5c1, Atp5f1, Atp5g1, Atp5g3, Atp5j2, Atp5k, Atp5o, Atp6v0d1, Atp6v0e2, Atp6v1b2, Atp6v1f, Atp6v1h, Cox10, Cox11, Cox17, Cox5a, Cox5b, Cox6a1, Cox6b1, Cox7a2, Cox7a2l, Cox7b, Cox8a, Cyc1, Ndufa10, Ndufa13, Ndufa2, Ndufa3, Ndufa6, Ndufa7, Ndufa8, Ndufa9, Ndufb10, Ndufb11, Ndufb2, Ndufb4, Ndufb5, Ndufb6, Ndufb7, Ndufb8, Ndufb9, Ndufc1, Ndufc2, Ndufs4, Ndufs6, Ndufs7, Ndufs8, Ndufv1, Ndufv2, Ndufv3, Ppa1, Ppa2, Sdhb, Sdhc, Sdhc, Sdhc, Uqcr10, Uqcr11, Uqcrc2, Uqcrc2, Uqcrcs1, Uqcrcq</i>                                                                                                                                                                                                                                              |
| Ribosome                      | -2.46                | 74/94                     | 0.0026 | <i>Mrpl10, Mrpl11, Mrpl12, Mrpl13, Mrpl14, Mrpl15, Mrpl18, Mrpl19, Mrpl2, Mrpl20, Mrpl22, Mrpl27, Mrpl28, Mrpl3, Mrpl33, Mrpl34, Mrpl9, Mrps10, Mrps11, Mrps12, Mrps17, Mrps18a, Mrps21, Mrps6, Mrps7, Rpl11, Rpl12, Rpl13, Rpl13a, Rpl14, Rpl15, Rpl18, Rpl22l1, Rpl27, Rpl27a, Rpl28, Rpl29, Rpl3, Rpl30, Rpl31, Rpl35, Rpl36, Rpl36a, Rpl37, Rpl38, Rpl39, Rpl4, Rpl41, Rpl6, Rpl8, Rplp0, Rplp1, Rps10, Rps13, Rps15, Rps16, Rps17, Rps18, Rps2, Rps20, Rps21, Rps23, Rps24, Rps27a, Rps28, Rps29, Rps3, Rps5, Rps6, Rps7, Rps8, Rps9, Rpsa</i>                                                                                                                                                                                                                      |
| Parkinson disease             | -2.30                | 100/133                   | 0.0026 | <i>Aft4, Atp5a1, Atp5b, Atp5c1, Atp5d, Atp5g1, Atp5f1, Atp5g3, Atp5h, Atp5o, Bax, Cox4i1, Cox5a, Cox5b, Cox6a1, Cox6b1, Cox7a2, Cox7a2l, Cox7b, Cox8a, Cyc1, Cycs, Daxx, Ndufa10, Ndufa13, Ndufa2, Ndufa3, Ndufa6, Ndufa7, Ndufa8, Ndufa9, Ndufb10, Ndufb11, Ndufb2, Ndufb5, Ndufb6, Ndufb7, Ndufb8, Ndufb9, Ndufc1, Ndufc2, Ndufs2, Ndufs4, Ndufs6, Ndufs7, Ndufs8, Ndufv1, Ndufv2, Ndufv3, Park7, Ppif, Psma6, Psma7, Psmb1, Psmb4, Psmb5, Psmb6, Psmb7, Psmc1, Psmc2, Psmc3, Psmc4, Psmc5, Psmc1, Psmc12, Psmc13, Psmc2, Psmc3, Psmc6, Psmc7, Psmc8, Psmc9, Rps27a, Sdha, Sdhb, Sdhc, Sdhc, Sept5, Trap1, Tuba1a, Tuba1b, Tuba1c, Tubb3, Tubb4b, Tubb5, Txn1, Txn2, Uba52, Ubb, Uchl1, Uqcr10, Uqcr11, Uqcrc1, Uqcrc2, Uqcrcs1, Uqcrcq, Vdac1, Vdac2, Vdac3, Xbp1</i> |
| Carbon metabolism             | -2.12                | 36/52                     | 0.0026 | <i>Acat2, Acat3, Aco2, Aldoart1, Aldoc, Ech1, Fh1, Gcsh, Glud1, Got1, Hadha, Hibch, Idh3a, Idh3b, Mcee, Mdh1, Mdh2, Pccb, Pcx, Pdha1, Pfk1, Pgam1, Pgk1, Pgls, Prps1, Prps113, Pspg, Rpe, Sdhb, Sdhc, Sdhc, Sucla2, Suclg1, Taldo1, Tkt, Tpi1</i>                                                                                                                                                                                                                                                                                                                                                                                                                                                                                                                        |
| Thermogenesis                 | -2.10                | 61/81                     | 0.0026 | <i>Actg1, Akt1s1, Atp5a1, Atp5b, Atp5c1, Atp5f1, Atp5g1, Atp5h, Atp5j2, Atp5k, Coa3, Cox10, Cox11, Cox16, Cox4i1, Cox5a, Cox5b, Cox6a1, Cox7a2, Cox7a2l, Cyc1, Ndufa10, Ndufa13, Ndufa2, Ndufa3, Ndufa6, Ndufa7, Ndufa9, Ndufaf2, Ndufaf3, Ndufaf5, Ndufb10, Ndufb11, Ndufb2, Ndufb5, Ndufb6, Ndufb7, Ndufb8, Ndufb9, Ndufc1, Ndufc2, Ndufs2, Ndufs4, Ndufs6, Ndufs7, Ndufs8, Ndufv1, Ndufv2, Ndufv3, Prkag1, Sdhb, Sdhc, Sdhc, Smarcd3, Uqcr10, Uqcr11, Uqcrc1, Uqcrc2, Uqcrcs1, Uqcrcq</i>                                                                                                                                                                                                                                                                             |
| Propanoate metabolism         | -2.05                | 11/26                     | 0.018  | <i>Acat2, Acat3, Bckdhh, Ech1, Hadha, Hibch, Ldhb, Mcee, Pccb, Sucla2, Suclg1</i>                                                                                                                                                                                                                                                                                                                                                                                                                                                                                                                                                                                                                                                                                        |
| TCA cycle                     | -1.99                | 16/24                     | 0.024  | <i>Aco2, Dlst, Fh1, Idh1, Idh3a, Idh3b, Mdh1, Mdh2, Pcx, Pdha1, Sdha, Sdhb, Sdhc, Sdhc, Sucla2, Suclg1</i>                                                                                                                                                                                                                                                                                                                                                                                                                                                                                                                                                                                                                                                               |
| Amyotrophic lateral sclerosis | -1.97                | 80/104                    | 0.0026 | <i>Actg1, Actr10, Actr1a, Atf4, Atp5a1, Atp5b, Atp5c1, Atp5f1, Atp5g1, Atp5h, Bad, Cox4i1, Cox5a, Cox5b, Cox6a1, Cox6b1, Cox7a2, Cox7a2l, Cyc1, Cycs, Daxx, Dctn3, Gabarap, Gpx1, Ndufa10, Ndufa13, Ndufa2, Ndufa3, Ndufa6, Ndufa7, Ndufa9, Ndufb10, Ndufb11, Ndufb2, Ndufb5, Ndufb6, Ndufb7, Ndufb8, Ndufb9, Ndufc1, Ndufc2, Ndufs2, Ndufs4, Ndufs6, Ndufs7, Ndufs8, Ndufv1, Ndufv2, Ndufv3, Psma6, Psma7, Psmb1, Psmb4, Psmb5, Psmb6, Psmb7, Psmc2, Psmc3, Psmc4, Psmc5, Psmc6, Psmc8, Psmc9, Sdhb, Sdhc, Sdhc, Sec13, Sigmar1, Sqstm1, Tomm40, Tomm40l, Tuba1c, Tubb4b, Uqcr10, Uqcr11, Uqcrc1, Uqcrc2, Uqcrcs1, Uqcrcq, Xbp1</i>                                                                                                                                     |
| Biosynthesis of cofactors     | -1.94                | 21/51                     | 0.0044 | <i>Adsl, Ak1, Akr1a1, Cmpk1, Coq2, Coq6, Coq7, Cox10, Ggh, Lias, Mocs2, Mpi, Mthfd2, Nme1, Nme3, Pank1, Phospho2, Pmm1, Psat1, Umps, Uros</i>                                                                                                                                                                                                                                                                                                                                                                                                                                                                                                                                                                                                                            |

|                                      |       |         |        |                                                                                                                                                                                                                                                                                                                                                                                                                                                                                                                                                                                                                                                                                                                                                                                                                        |
|--------------------------------------|-------|---------|--------|------------------------------------------------------------------------------------------------------------------------------------------------------------------------------------------------------------------------------------------------------------------------------------------------------------------------------------------------------------------------------------------------------------------------------------------------------------------------------------------------------------------------------------------------------------------------------------------------------------------------------------------------------------------------------------------------------------------------------------------------------------------------------------------------------------------------|
| Huntington disease                   | -1.92 | 105/139 | 0.0026 | <i>Actr10, Actr1a, Ap2a1, Ap2m1, Ap2s1, Atp5a1, Atp5b, Atp5c1, Atp5d, Atp5f1, Atp5g1, Atp5g3, Atp5h, Atp5o, Bax, Cita, Cox4i1, Cox5a, Cox5b, Cox6a1, Cox6b1, Cox7a2, Cox7a2l, Cox7b, Cox8a, Cyc1, Cycs, Dctn2, Dctn3, Dctn5, Gpx1, Ift57, Ndufa10, Ndufa13, Ndufa2, Ndufa3, Ndufa6, Ndufa7, Ndufa8, Ndufa9, Ndufb10, Ndufb11, Ndufb2, Ndufb5, Ndufb6, Ndufb7, Ndufb8, Ndufb9, Ndufc1, Ndufc2, Ndufs2, Ndufs4, Ndufs6, Ndufs7, Ndufs8, Ndufv1, Ndufv2, Ndufv3, Polr2d, Polr2e, Polr2f, Polr2g, Polr2h, Polr2i, Ppif, Psma6, Psma7, Psmb1, Psmb4, Psmb5, Psmb6, Psmb7, Psmc1, Psmc2, Psmc3, Psmc4, Psmc5, Psmd1, Psmd12, Psmd13, Psmd2, Psmd3, Psmd6, Psmd7, Psmd8, Psmd9, Sdha, Sdhb, Sdhc, Sdhc, Tuba1a, Tuba1b, Tuba1c, Tubb3, Tubb4b, Tubb5, Uqcr10, Uqcr11, Uqcrc1, Uqcrc2, Uqcrfs1, Uqcrq, Vdac1, Vdac2, Vdac3</i> |
| Biosynthesis of amino acids          | -1.91 | 22/44   | 0.016  | <i>Aco2, Aldoart1, Aldoc, Asns, Got1, Idh1, Idh3a, Idh3b, Pcx, Pfk1, Pfkml, Pgaml1, Pgk1, Prps1, Prsp1l3, Psat1, Psph, Pycr1, Rpe, Taldo1, Tkt, Tpi1</i>                                                                                                                                                                                                                                                                                                                                                                                                                                                                                                                                                                                                                                                               |
| Aminoacyl-tRNA biosynthesis          | -1.83 | 17/32   | 0.038  | <i>Aars, Aars2, Cars, Dars, Farsa, Farsb, Gars, Hars, Kars, Mars, Nars, Sars, Sars2, Tars2, Wars, Yars, Yars2</i>                                                                                                                                                                                                                                                                                                                                                                                                                                                                                                                                                                                                                                                                                                      |
| Folate biosynthesis                  | -1.82 | 3/11    | 0.035  | <i>Ggh, Mocs2, Qdpr</i>                                                                                                                                                                                                                                                                                                                                                                                                                                                                                                                                                                                                                                                                                                                                                                                                |
| Prion disease                        | -1.81 | 77/94   | 0.0026 | <i>Atf4, Atf6b, Atp5a1, Atp5b, Atp5c1, Atp5f1, Atp5g1, Atp5h, Atp5o, Bad, Cox4i1, Cox5a, Cox5b, Cox6a1, Cox6b1, Cox7a2, Cox7a2l, Cox7b, Cox, Cyc1, Cycs, Hspa8, Ndufa10, Ndufa13, Ndufa2, Ndufa3, Ndufa6, Ndufa7, Ndufa8, Ndufa9, Ndufb10, Ndufb11, Ndufb2, Ndufb5, Ndufb6, Ndufb7, Ndufb8, Ndufb9, Ndufc1, Ndufc2, Ndufs2, Ndufs4, Ndufs6, Ndufs7, Ndufs8, Ndufv1, Ndufv2, Ndufv3, Ppif, Psma6, Psma7, Psmb1, Psmb4, Psmb5, Psmb6, Psmb7, Psmc2, Psmc3, Psmc4, Psmc5, Psmd1, Psmd6, Psmd8, Psmd9, Sdhb, Sdhc, Sdhc, Stip1, Tuba1c, Tubb4b, Uqcr10, Uqcr11, Uqcrc1, Uqcrc2, Uqcrfs1, Uqcrq, Vdac3</i>                                                                                                                                                                                                                  |
| Steroid biosynthesis                 | -1.80 | 7/11    | 0.038  | <i>Cyp51, Dhcr24, Dhcr7, Fdt1, Hsd17b7, Nsdhl, Sqle</i>                                                                                                                                                                                                                                                                                                                                                                                                                                                                                                                                                                                                                                                                                                                                                                |
| Non-alcoholic fatty liver disease    | -1.75 | 47/51   | 0.012  | <i>Atf4, Cdc42, Cox4i1, Cox5a, Cox5b, Cox6a1, Cox6b1, Cox7a2, Cox7a2l, Cyc1, Cycs, Ndufa10, Ndufa13, Ndufa2, Ndufa3, Ndufa6, Ndufa7, Ndufa9, Ndufb10, Ndufb11, Ndufb2, Ndufb5, Ndufb6, Ndufb7, Ndufb8, Ndufb9, Ndufc1, Ndufc2, Ndufs2, Ndufs4, Ndufs6, Ndufs8, Ndufv1, Ndufv2, Ndufv3, Prkag1, Sdhb, Sdhc, Sdhc, Uqcr10, Uqcr11, Uqcrc1, Uqcrc2, Uqcrfs1, Uqcrq, Xbp1</i>                                                                                                                                                                                                                                                                                                                                                                                                                                              |
| Pathways of neurodegeneration        | -1.74 | 93/143  | 0.0026 | <i>Actr10, Actr1a, Atf4, Atp5a1, Atp5b, Atp5c1, Atp5f1, Atp5g1, Atp5h, Atp5o, Bad, Cox4i1, Cox5a, Cox5b, Cox6a1, Cox6b1, Cox7a2, Cox7a2l, Cox7b, Cox8a, Cyc1, Cycs, Daxx, Dctn3, Gabarap, Gpx1, Hsd17b10, Ift57, Ndufa10, Ndufa3, Ndufa2, Ndufa3, Ndufa6, Ndufa7, Ndufa8, Ndufa9, Ndufc1, Ndufc2, Ndufs2, Ndufs4, Ndufs6, Ndufs7, Ndufs8, Ndufv1, Ndufv2, Ndufv3, Park7, Ppif, Psma6, Psma7, Psmb1, Psmb4, Psmb5, Psmb6, Psmb7, Psmc2, Psmc3, Psmc4, Psmc5, Psmd1, Psmd6, Psmd8, Psmd9, Rab8a, Rps27a, Sdhb, Sdhc, Sdhc, Septin5, Sigmar1, Sqstm1, Tomm40, Tom40l, Trap1, Tuba1c, Tubb4b, Ubb, Uqcr10, Uqcr11, Uqcrc1, Uqcrc2, Uqcrfs1, Uqcrq, Vdac3, Xbp1</i>                                                                                                                                                         |
| Alcoholism                           | -1.69 | 10/48   | 0.024  | <i>Atf4, Atf6b, Gnb2, Gnb5, H2aj, Hist1h2bc, Hist3h2a, Hist3h2ba, Pp1ca, Psmb5</i>                                                                                                                                                                                                                                                                                                                                                                                                                                                                                                                                                                                                                                                                                                                                     |
| Peroxisome                           | -1.68 | 9/40    | 0.050  | <i>Amacr, Idh1, Mpv17, Mpv17l2, Mvk, Nudt19, Pex19, Prdx5, Scp2</i>                                                                                                                                                                                                                                                                                                                                                                                                                                                                                                                                                                                                                                                                                                                                                    |
| Necroptosis                          | -1.61 | 12/31   | 0.042  | <i>Chmp3, Chmp6, Chmp7, Faf1, Glud1, H2affj, Hist3h2a, Pgaml5, Ppia, Smpd1, Sqstm1, Vdac3</i>                                                                                                                                                                                                                                                                                                                                                                                                                                                                                                                                                                                                                                                                                                                          |
| Retrograde endocannabinoid signaling | -1.60 | 27/40   | 0.040  | <i>Gnb2, Gnb5, Ndufa10, Ndufa13, Ndufa2, Nduf3, Ndufa6, Ndufa7, Ndufa9, Ndufb10, Ndufb11, Ndufb2, Ndufb5, Ndufb6, Ndufb7, Ndufb8, Ndufb9, Ndufc1, Ndufc2, Ndufs2, Ndufs4, Ndufs6, Ndufs7, Ndufs8, Ndufv1, Ndufv2, Ndufv3</i>                                                                                                                                                                                                                                                                                                                                                                                                                                                                                                                                                                                           |

|                   |       |        |        |                                                                                                                                                                                                                                                                                                                                                                                                                                                                                                                                                                                                                   |
|-------------------|-------|--------|--------|-------------------------------------------------------------------------------------------------------------------------------------------------------------------------------------------------------------------------------------------------------------------------------------------------------------------------------------------------------------------------------------------------------------------------------------------------------------------------------------------------------------------------------------------------------------------------------------------------------------------|
| Alzheimer disease | -1.57 | 78/110 | 0.0064 | <i>Apbb1, Atf4, Atp5a1, Atp5b, Atp5c1, Atp5g1, Atp5h, Atp5o, Atp5pb, Bad, Cox4i1, Cox5a, Cox5b, Cox6a1, Cox6b1, Cox7a2, Cox7a2l, Cox7b, Cox8a, Cyc1, Cycs, Hsd17b10, Ndufa10, Ndufa13, Ndufa2, Ndufa3, Ndufa6, Ndufa7, Ndufa8, Ndufa9, Ndufb10, Ndufb11, Ndufb2, Ndufb5, Ndufb6, Ndufb7, Ndufb8, Ndufb9, Ndufc1, Ndufc2, Ndufs2, Ndufs4, Ndufs6, Ndufs7, Ndufs8, Ndufv1, Ndufv2, Ndufv3, Ppif, Psenen, Psma6, Psma7, Psmb1, Psmb4, Psmb5, Psmb6, Psmb7, Psmc2, Psmc3, Psmc4, Psmc5, Psmd1, Psmd6, Psmd8, Psmd9, Sdhb, Sdhc, Sdhc, Tuba1c, Tubb4b, Uqcr10, Uqcr11, Uqcrc1, Uqcrc2, Uqcrfs1, Uqcrq, Vdac3, Xbp1</i> |
|-------------------|-------|--------|--------|-------------------------------------------------------------------------------------------------------------------------------------------------------------------------------------------------------------------------------------------------------------------------------------------------------------------------------------------------------------------------------------------------------------------------------------------------------------------------------------------------------------------------------------------------------------------------------------------------------------------|

**Table S4 - Genes within KEGG Pathways related to ribosome biogenesis that are dysregulated by PAE**

| Gene Name                                          | Fold Change<br>(Alc/Control) | P value  | P adj      | Gene                                                                      |
|----------------------------------------------------|------------------------------|----------|------------|---------------------------------------------------------------------------|
| <b>rRNA Synthesis - KEGG 03020</b>                 |                              |          |            |                                                                           |
| <i>Eif4a1</i>                                      | 0.90                         | 5.57E-03 | 0.031      | eukaryotic translation initiation factor 4A family member                 |
| <i>Eif4a2</i>                                      | 0.95                         | 8.02E-03 | 0.040      | eukaryotic translation initiation factor 4A family member                 |
| <i>Eif4ebp1</i>                                    | 0.67                         | 3.03E-03 | 0.020      | eukaryotic translation initiation factor 4A family member                 |
| <i>Eif4g3</i>                                      | 1.06                         | 2.43E-03 | 0.017      | eukaryotic translation initiation factor 4A family member                 |
| <i>Polr1d</i>                                      | 0.93                         | 1.03E-02 | 0.048      | polymerase (RNA) 1 polypeptide D                                          |
| <i>Polr2d</i>                                      | 0.95                         | 2.45E-03 | 0.017      | polymerase (RNA) 2 polypeptide D                                          |
| <i>Polr2e</i>                                      | 0.92                         | 1.84E-04 | 0.0028     | polymerase (RNA) 2 polypeptide E                                          |
| <i>Polr2f</i>                                      | 0.91                         | 6.54E-04 | 0.0070     | polymerase (RNA) 2 polypeptide F                                          |
| <i>Polr2g</i>                                      | 0.94                         | 4.26E-03 | 0.026      | polymerase (RNA) 2 polypeptide G                                          |
| <i>Polr2h</i>                                      | 0.91                         | 2.19E-03 | 0.016      | polymerase (RNA) 2 polypeptide H                                          |
| <i>Polr2i</i>                                      | 0.94                         | 2.35E-03 | 0.017      | polymerase (RNA) 2 polypeptide I                                          |
| <i>Polr2m</i>                                      | 0.90                         | 1.09E-04 | 0.0019     | polymerase (RNA) 2 polypeptide M                                          |
| <i>Polr3d</i>                                      | 0.89                         | 1.07E-02 | 0.050      | polymerase (RNA) 3 polypeptide D                                          |
| <i>Rps6ka3</i>                                     | 1.11                         | 5.20E-03 | 0.030      | RPS6 Kinase alpha3 subunit                                                |
| <i>Rps19bp1</i>                                    | 0.90                         | 1.42E-05 | 0.00043    | RPS19 binding protein 1                                                   |
| <b>rRNA Processing &amp; Assembly - KEGG 03008</b> |                              |          |            |                                                                           |
| <i>Csnk1g1</i>                                     | 1.08                         | 1.20E-06 | 7.20E-05   | casein kinase 2, gamma 1 polypeptide                                      |
| <i>Csnk1g2</i>                                     | 0.93                         | 1.15E-03 | 0.010      | casein kinase 2, gamma 1 polypeptide                                      |
| <i>Csnk2b</i>                                      | 0.96                         | 2.11E-03 | 0.016      | casein kinase 2, gamma 1 polypeptide                                      |
| <i>Ddx1</i>                                        | 0.92                         | 2.18E-03 | 0.016      | DEAD (Asp-Glu-Ala-Asp) box polypeptide 1                                  |
| <i>Ddx17</i>                                       | 1.08                         | 3.59E-03 | 0.023      | DEAD (Asp-Glu-Ala-Asp) box polypeptide 17                                 |
| <i>Ddx6</i>                                        | 1.03                         | 5.80E-03 | 0.032      | DEAD (Asp-Glu-Ala-Asp) box polypeptide 6                                  |
| <i>Ddx19b</i>                                      | 0.99                         | 4.59E-03 | 0.027      | DEAD (Asp-Glu-Ala-Asp) box polypeptide 19B                                |
| <i>Ddx24</i>                                       | 0.92                         | 8.01E-03 | 0.040      | DEAD (Asp-Glu-Ala-Asp) box polypeptide 24                                 |
| <i>Ddx25</i>                                       | 0.89                         | 1.32E-07 | 1.44E-05   | DEAD (Asp-Glu-Ala-Asp) box polypeptide25                                  |
| <i>Ddx28</i>                                       | 0.89                         | 7.64E-04 | 0.0078     | DEAD (Asp-Glu-Ala-Asp) box polypeptide 28                                 |
| <i>Ddx39</i>                                       | 0.87                         | 9.44E-03 | 0.045      | DEAD (Asp-Glu-Ala-Asp) box polypeptide 39                                 |
| <i>Ddx39b</i>                                      | 0.94                         | 1.08E-03 | 0.0099     | DEAD (Asp-Glu-Ala-Asp) box polypeptide 39B                                |
| <i>Ddx49</i>                                       | 0.89                         | 6.12E-03 | 0.033      | DEAD (Asp-Glu-Ala-Asp) box polypeptide 49                                 |
| <i>Ddx54</i>                                       | 0.86                         | 1.19E-04 | 0.0020     | DEAD (Asp-Glu-Ala-Asp) box polypeptide 54                                 |
| <i>Ddx59</i>                                       | 0.85                         | 1.98E-04 | 0.0029     | DEAD (Asp-Glu-Ala-Asp) box polypeptide 59                                 |
| <i>Eif1</i>                                        | 0.97                         | 1.77E-03 | 0.014      | eukaryotic translation initiation factor 1                                |
| <i>Eif2ak2</i>                                     | 1.20                         | 6.78E-04 | 0.0072     | eukaryotic translation initiation factor 2 Alpha Kinase 2                 |
| <i>Eif2b1</i>                                      | 0.92                         | 1.86E-03 | 0.014      | eukaryotic translation initiation factor 2B, subunit 1                    |
| <i>Eif2b2</i>                                      | 0.96                         | 7.89E-03 | 0.040      | eukaryotic translation initiation factor 2B, subunit 2                    |
| <i>Eif2b4</i>                                      | 0.92                         | 1.35E-03 | 0.012      | eukaryotic translation initiation factor 2B, subunit 4                    |
| <i>Eif2b5</i>                                      | 0.88                         | 1.18E-05 | 0.00038    | eukaryotic translation initiation factor 2B, subunit 5                    |
| <i>Eif2s2</i>                                      | 0.91                         | 1.34E-05 | 0.00042    | eukaryotic translation initiation factor S, subunit beta                  |
| <i>Eif3b</i>                                       | 0.91                         | 2.37E-05 | 0.00063    | eukaryotic translation initiation factor 3, subunitB                      |
| <i>Eif3d</i>                                       | 0.89                         | 1.07E-06 | 6.59E-05   | eukaryotic translation initiation factor 3, subunit D                     |
| <i>Eif3g</i>                                       | 0.94                         | 5.56E-08 | 7.92E-06   | eukaryotic translation initiation factor 3, subunit G                     |
| <i>Eif3h</i>                                       | 0.92                         | 8.76E-06 | 0.00031    | eukaryotic translation initiation factor 3, subunit H                     |
| <i>Eif3i</i>                                       | 0.89                         | 1.36E-04 | 0.0022     | eukaryotic translation initiation factor 3, subunit I                     |
| <i>Eif3k</i>                                       | 0.93                         | 6.19E-06 | 0.00024    | eukaryotic translation initiation factor 3, subunit K                     |
| <i>Eif3l</i>                                       | 0.95                         | 2.60E-04 | 0.0036     | eukaryotic translation initiation factor 3, subunit L                     |
| <i>Eif4a1</i>                                      | 0.90                         | 5.57E-03 | 0.031      | eukaryotic translation initiation factor 4A1                              |
| <i>Eif4a2</i>                                      | 0.95                         | 8.02E-03 | 0.040      | eukaryotic translation initiation factor 4A2                              |
| <i>Eif4ebp1</i>                                    | 0.67                         | 3.03E-03 | 0.020      | eukaryotic translation initiation factor 4E binding protein 1             |
| <i>Eif4g3</i>                                      | 1.06                         | 2.43E-03 | 0.017      | eukaryotic translation initiation factor 4 Gamma 3                        |
| <i>Eif5a</i>                                       | 0.91                         | 1.70E-04 | 0.0026     | eukaryotic translation initiation factor 5A                               |
| <i>Imp3</i>                                        | 0.94                         | 2.39E-03 | 0.017      | U3 small nucleolar ribonucleoprotein, IMP3-like                           |
| <i>Larp4</i>                                       | 1.09                         | 2.27E-03 | 0.016      | La ribonucleoprotein domain family, member 4                              |
| <i>Larp7</i>                                       | 0.91                         | 5.58E-03 | 0.031      | La ribonucleoprotein domain family, member 5                              |
| <i>Nhp2</i>                                        | 0.86                         | 2.98E-06 | 0.00014007 | NHP2 ribonucleoprotein homolog, H/ACA ribonucleoprotein complex subunit 2 |
| <i>Nob1</i>                                        | 0.92                         | 5.91E-03 | 0.033      | NIN1/RPN12 binding protein 1 homolog                                      |
| <i>Nol12</i>                                       | 0.85                         | 6.07E-05 | 0.0012     | nucleolar protein 12                                                      |
| <i>Nol7</i>                                        | 0.91                         | 7.73E-06 | 0.00028    | nucleolar protein 7                                                       |
| <i>Nop10</i>                                       | 0.92                         | 1.31E-04 | 0.0022     | NOP10 ribonucleoprotein homolog                                           |

|                |      |          |          |                                                       |
|----------------|------|----------|----------|-------------------------------------------------------|
| <i>Nsun7</i>   | 1.46 | 1.69E-04 | 0.0026   | NOP2/Sun domain family, member 7                      |
| <i>Pno1</i>    | 0.89 | 3.28E-04 | 0.0043   | partner of NOB1 homolog                               |
| <i>Pop5</i>    | 0.90 | 6.62E-04 | 0.0071   | processing of precursor 5, ribonuclease P/MRP subunit |
| <i>Rpusd1</i>  | 0.92 | 4.31E-03 | 0.026    | RNA Pseudouridine Synthase Domain Containing 1        |
| <i>Rpusd2</i>  | 1.04 | 8.04E-03 | 0.041    | RNA Pseudouridine Synthase Domain Containing 2        |
| <i>Ran</i>     | 0.89 | 6.24E-04 | 0.0068   | RAN, member RAS oncogene family                       |
| <i>Ranbp10</i> | 1.06 | 5.92E-04 | 0.0065   | RAN binding protein 10                                |
| <i>Ranbp3</i>  | 0.90 | 4.93E-03 | 0.029    | RAN binding protein 3                                 |
| <i>Ranbp3l</i> | 1.70 | 4.89E-06 | 0.00020  | RAN binding protein 3-like                            |
| <i>Rexo2</i>   | 0.95 | 9.12E-03 | 0.044    | REX2, RNA exonuclease 2 homolog                       |
| <i>Rrp1</i>    | 0.92 | 6.02E-05 | 0.0012   | ribosomal RNA processing 1                            |
| <i>Rrp12</i>   | 0.83 | 6.54E-03 | 0.035    | ribosomal RNA processing 12                           |
| <i>Rrp36</i>   | 0.93 | 8.47E-03 | 0.042    | ribosomal RNA processing 36                           |
| <i>Rrp7a</i>   | 0.88 | 5.28E-05 | 0.0011   | ribosomal RNA processing 7A                           |
| <i>Rrbp1</i>   | 1.08 | 3.92E-03 | 0.024    | Ribosome Binding Protein 1                            |
| <i>Snrnp25</i> | 0.83 | 6.05E-05 | 0.0012   | small nucleolar ribonucleoprotein 25 kDa              |
| <i>Snrnp27</i> | 0.96 | 7.92E-04 | 0.0080   | small nucleolar ribonucleoprotein 27 kDa              |
| <i>Snrnp40</i> | 0.90 | 2.59E-03 | 0.018    | small nucleolar ribonucleoprotein 40 kDa              |
| <i>Snrpa1</i>  | 0.93 | 5.65E-03 | 0.032    | small nucleolar ribonucleoprotein polypeptide A1      |
| <i>Snrpd1</i>  | 0.94 | 2.13E-04 | 0.0031   | small nucleolar ribonucleoprotein polypeptide D1      |
| <i>Snrpd2</i>  | 0.91 | 4.74E-05 | 0.0011   | small nucleolar ribonucleoprotein polypeptide D2      |
| <i>Snrpe</i>   | 0.92 | 4.18E-03 | 0.025    | small nucleolar ribonucleoprotein polypeptide E       |
| <i>Utp18</i>   | 0.93 | 7.75E-03 | 0.040    | UTP18 Small Subunit Processome Component              |
| <i>Wdr18</i>   | 0.86 | 8.73E-06 | 0.00031  | WD repeat domain 18, component of PELP1 of pre60S     |
| <i>Wdr26</i>   | 1.05 | 6.02E-05 | 0.0012   | WD repeat domain 26, component of PELP1 of pre60S     |
| <i>Wdr34</i>   | 0.89 | 1.17E-03 | 0.010    | WD repeat domain 34, component of PELP1 of pre60S     |
| <i>Wdr48</i>   | 0.91 | 7.88E-04 | 0.0080   | WD repeat domain 48, component of PELP1 of pre60S     |
| <i>Wdr74</i>   | 0.90 | 3.85E-05 | 0.00090  | WD repeat domain 74, component of PELP1 of pre60S     |
| <i>Wdr82</i>   | 0.88 | 2.30E-12 | 7.55E-09 | WD repeat domain 82, component of PELP1 of pre60S     |
| <i>Wdr86</i>   | 1.28 | 3.71E-03 | 0.023    | WD repeat domain 86, component of PELP1 of pre60S     |
| <i>Xpo1</i>    | 1.10 | 5.99E-04 | 0.0066   | exportin 1                                            |
| <i>Xrn1</i>    | 1.14 | 2.55E-04 | 0.0035   | 5'-3' exoribonuclease 1                               |
|                |      |          |          |                                                       |
| <i>Mdm1</i>    | 1.15 | 6.94E-03 | 0.036    | Murine double minute-1                                |
| <i>Mdm4</i>    | 1.20 | 9.22E-04 | 0.0089   | Murine double minute-4                                |

#### tRNA Synthesis - KEGG 00970

|                |      |          |          |                                                                         |
|----------------|------|----------|----------|-------------------------------------------------------------------------|
| <i>Aars</i>    | 0.84 | 2.49E-05 | 0.00065  | Alanyl-TRNA Synthetase                                                  |
| <i>Aars2</i>   | 0.85 | 5.09E-03 | 0.029    | Alanyl-TRNA Synthetase                                                  |
| <i>Aarsd1</i>  | 0.89 | 5.26E-05 | 0.0011   | Alanyl-TRNA Synthetase Domain Containing 3                              |
| <i>Cars</i>    | 0.80 | 1.20E-06 | 7.20E-05 | Cystinyl-TRNA Synthetase                                                |
| <i>Dars</i>    | 0.89 | 1.91E-06 | 0.00010  | Aspartyl-TRNA Synthetase                                                |
| <i>Farsa</i>   | 0.91 | 8.25E-04 | 0.0082   | Phenylalanyl-TRNA Synthetase, subunit alpha                             |
| <i>Farsb</i>   | 0.87 | 3.37E-09 | 9.69E-07 | Phenylalanyl-tRNA synthetase, subunit beta                              |
| <i>Gars</i>    | 0.88 | 9.97E-07 | 6.34E-05 | Glycyl-TRNA Synthetase                                                  |
| <i>Hars</i>    | 0.89 | 1.73E-05 | 0.00050  | Hisdinyl-TRNA Synthetase                                                |
| <i>Kars</i>    | 0.89 | 1.81E-06 | 9.74E-05 | Lysyl-TRNA Synthetase                                                   |
| <i>Mars</i>    | 0.88 | 4.00E-04 | 0.0050   | Methionyl-TRNA Synthetase                                               |
| <i>Mars2</i>   | 1.14 | 2.75E-03 | 0.019    | Methionyl-TRNA Synthetase 2                                             |
| <i>Nars</i>    | 0.89 | 1.16E-03 | 0.010    | Asparaginyl-TRNA Synthetase                                             |
| <i>Sars</i>    | 0.89 | 5.12E-08 | 7.55E-06 | Serinyl-TRNA Synthetase                                                 |
| <i>Sars2</i>   | 0.84 | 5.59E-03 | 0.031    | Serinyl-TRNA Synthetase 2                                               |
| <i>Tars2</i>   | 0.85 | 1.56E-03 | 0.013    | Threoninyl-TRNA Synthetase                                              |
| <i>Wars</i>    | 0.91 | 5.58E-05 | 0.0012   | Tryptophenyl-TRNA Synthetase                                            |
| <i>Yars</i>    | 0.83 | 7.97E-08 | 1.01E-05 | Tyrosinyl-TRNA Synthetase                                               |
| <i>Yars2</i>   | 0.88 | 3.42E-03 | 0.022    | Tyrosinyl-TRNA Synthetase 2                                             |
| <i>Aimp1</i>   | 0.95 | 2.81E-03 | 0.019    | aminoacyl tRNA synthetase complex-interacting multifunctional protein-1 |
| <i>Aimp2</i>   | 0.82 | 8.33E-09 | 1.91E-06 | aminoacyl tRNA synthetase complex-interacting multifunctional protein-2 |
| <i>Pop5</i>    | 0.90 | 6.62E-04 | 0.0071   | processing of precursor 5, ribonuclease P/MRP subunit                   |
| <i>Trmt112</i> | 0.93 | 1.70E-03 | 0.014    | TRNA Methyltransferase Activator Subunit 11-2                           |
| <i>Pthrhd1</i> | 0.89 | 1.73E-03 | 0.014    | Peptidyl-TRNA Hydrolase Domain Containing 1                             |

#### Ribosomal proteins - KEGG 04150

|                |      |          |          |                                            |
|----------------|------|----------|----------|--------------------------------------------|
| <i>Rpl3</i>    | 0.92 | 2.58E-07 | 2.27E-05 | Ribosome protein L3                        |
| <i>Rpl4</i>    | 0.95 | 4.87E-04 | 0.0056   | Ribosome protein L4                        |
| <i>Rpl6</i>    | 0.93 | 6.19E-04 | 0.0068   | Ribosome protein L6                        |
| <i>Rpl7</i>    | 0.97 | 2.22E-03 | 0.016    | Ribosome protein L7                        |
| <i>Rpl8</i>    | 0.91 | 3.16E-05 | 0.00079  | Ribosome protein L8                        |
| <i>Rpl10</i>   | 0.96 | 5.88E-05 | 0.0012   | Ribosome protein L10                       |
| <i>Rpl10a</i>  | 0.96 | 4.76E-03 | 0.028    | Ribosome protein L10A                      |
| <i>Rpl11</i>   | 0.91 | 8.88E-06 | 0.00031  | Ribosome protein L11                       |
| <i>Rpl12</i>   | 0.94 | 8.95E-03 | 0.044    | Ribosome protein L12                       |
| <i>Rpl13</i>   | 0.94 | 1.89E-03 | 0.014    | Ribosome protein L13                       |
| <i>Rpl13a</i>  | 0.87 | 3.44E-05 | 0.00083  | Ribosome protein L13A                      |
| <i>Rpl14</i>   | 0.95 | 3.98E-03 | 0.025    | Ribosome protein L14                       |
| <i>Rpl15</i>   | 0.90 | 2.59E-09 | 8.70E-07 | Ribosome protein L15                       |
| <i>Rpl18</i>   | 0.86 | 4.53E-06 | 0.00019  | Ribosome protein L18                       |
| <i>Rpl18a</i>  | 0.96 | 1.03E-02 | 0.048    | Ribosome protein L18A                      |
| <i>Rpl19</i>   | 0.94 | 1.16E-03 | 0.010    | Ribosome protein L19                       |
| <i>Rpl22l1</i> | 0.87 | 4.65E-03 | 0.027    | Ribosome protein L22-like 1                |
| <i>Rpl23</i>   | 0.97 | 7.40E-03 | 0.038    | Ribosome protein L23                       |
| <i>Rpl23a</i>  | 0.99 | 6.19E-03 | 0.034    | Ribosome protein 23A                       |
| <i>Rpl27</i>   | 0.95 | 4.62E-03 | 0.027    | Ribosome protein L27                       |
| <i>Rpl27a</i>  | 0.93 | 1.29E-04 | 0.0022   | Ribosome protein L27A                      |
| <i>Rpl28</i>   | 0.93 | 3.11E-06 | 0.00014  | Ribosome protein L28                       |
| <i>Rpl29</i>   | 0.95 | 1.64E-05 | 0.00048  | Ribosome protein L29                       |
| <i>Rpl30</i>   | 0.86 | 3.16E-03 | 0.021    | Ribosome protein L30                       |
| <i>Rpl31</i>   | 0.89 | 1.13E-03 | 0.010    | Ribosome protein L31                       |
| <i>Rpl35</i>   | 0.95 | 2.16E-03 | 0.016    | Ribosome protein L35                       |
| <i>Rpl36</i>   | 0.91 | 1.17E-03 | 0.010    | Ribosome protein L56                       |
| <i>Rpl36a</i>  | 0.89 | 5.74E-04 | 0.0064   | Ribosome protein L36A                      |
| <i>Rpl36al</i> | 0.95 | 8.29E-05 | 0.0015   | Ribosome protein L36A like                 |
| <i>Rpl37</i>   | 0.87 | 2.16E-05 | 0.00059  | Ribosome protein L37                       |
| <i>Rpl38</i>   | 0.88 | 3.49E-03 | 0.022    | Ribosome protein L38                       |
| <i>Rpl39</i>   | 0.88 | 1.54E-03 | 0.013    | Ribosome protein L39                       |
| <i>Rpl41</i>   | 0.87 | 1.56E-07 | 1.65E-05 | Ribosome protein L41                       |
| <i>Rplp0</i>   | 0.91 | 2.45E-04 | 0.0034   | Ribosomal protein lateral stalk subunit P0 |
| <i>Rplp1</i>   | 0.91 | 1.89E-05 | 0.00054  | Ribosomal protein lateral stalk subunit P1 |
| <i>Rpp30</i>   | 0.92 | 5.93E-03 | 0.033    | Ribonuclease P/MRP Subunit P30             |
| <i>Rpp40</i>   | 0.70 | 3.73E-04 | 0.0047   | Ribonuclease P/MRP Subunit P40             |
| <i>Rps2</i>    | 0.84 | 6.95E-05 | 0.0014   | Ribosome protein S2                        |
| <i>Rps3</i>    | 0.85 | 1.32E-04 | 0.0022   | Ribosome protein S3                        |
| <i>Rps5</i>    | 0.88 | 1.03E-04 | 0.0018   | Ribosome protein S5                        |
| <i>Rps6</i>    | 0.95 | 4.93E-03 | 0.029    | Ribosome protein S6                        |
| <i>Rps7</i>    | 0.89 | 5.74E-05 | 0.0012   | Ribosome protein S7                        |
| <i>Rps8</i>    | 0.94 | 1.41E-03 | 0.012    | Ribosome protein S8                        |
| <i>Rps9</i>    | 0.90 | 3.04E-03 | 0.020    | Ribosome protein S9                        |
| <i>Rps10</i>   | 0.94 | 1.86E-04 | 0.0028   | Ribosome protein S10                       |
| <i>Rps11</i>   | 0.97 | 1.55E-03 | 0.013    | Ribosome protein S11                       |
| <i>Rps13</i>   | 0.92 | 8.13E-03 | 0.041    | Ribosome protein S14                       |
| <i>Rps15</i>   | 0.91 | 1.53E-05 | 0.00046  | Ribosome protein S15                       |
| <i>Rps16</i>   | 0.90 | 8.81E-04 | 0.0086   | Ribosome protein S16                       |
| <i>Rps17</i>   | 0.92 | 9.63E-04 | 0.0092   | Ribosome protein S17                       |
| <i>Rps18</i>   | 0.92 | 1.93E-03 | 0.015    | Ribosome protein S18                       |
| <i>Rps20</i>   | 0.94 | 8.93E-04 | 0.0086   | Ribosome protein S20                       |
| <i>Rps21</i>   | 0.87 | 8.19E-05 | 0.0015   | Ribosome protein S21                       |
| <i>Rps23</i>   | 0.92 | 1.88E-04 | 0.0028   | Ribosome protein S23                       |
| <i>Rps24</i>   | 0.95 | 5.49E-05 | 0.0012   | Ribosome protein S24                       |
| <i>Rps27a</i>  | 0.91 | 3.07E-03 | 0.020    | Ribosome protein 27A                       |
| <i>Rps28</i>   | 0.89 | 8.03E-03 | 0.041    | Ribosome protein S28                       |
| <i>Rps29</i>   | 0.88 | 2.38E-04 | 0.0034   | Ribosome protein S29                       |
| <i>Rpsa</i>    | 0.86 | 1.09E-05 | 0.00036  | Ribosome protein SA                        |
| <i>Mrpl2</i>   | 0.94 | 2.96E-03 | 0.020    | Mitochondrial ribosome protein L2          |
| <i>Mrpl3</i>   | 0.95 | 1.19E-03 | 0.011    | Mitochondrial ribosome protein L3          |
| <i>Mrpl9</i>   | 0.93 | 7.00E-03 | 0.037    | Mitochondrial ribosome protein L9          |
| <i>Mrpl10</i>  | 0.91 | 1.10E-03 | 0.010    | Mitochondrial ribosome protein L10         |

|                |      |          |             |                                     |
|----------------|------|----------|-------------|-------------------------------------|
| <i>Mrpl11</i>  | 0.83 | 1.06E-08 | 2.25E-06    | Mitochondrial ribosome protein L11  |
| <i>Mrpl12</i>  | 0.88 | 4.28E-06 | 0.00018     | Mitochondrial ribosome protein L12  |
| <i>Mrpl13</i>  | 0.95 | 3.42E-03 | 0.022       | Mitochondrial ribosome protein L13  |
| <i>Mrpl14</i>  | 0.95 | 4.14E-03 | 0.025       | Mitochondrial ribosome protein L14  |
| <i>Mrpl15</i>  | 0.80 | 6.64E-08 | 9.07E-06    | Mitochondrial ribosome protein L15  |
| <i>Mrpl18</i>  | 0.94 | 1.61E-03 | 0.013       | Mitochondrial ribosome protein L18  |
| <i>Mrpl19</i>  | 0.83 | 8.13E-04 | 0.0081      | Mitochondrial ribosome protein L19  |
| <i>Mrpl20</i>  | 0.91 | 6.48E-05 | 0.0013      | Mitochondrial ribosome protein L20  |
| <i>Mrpl22</i>  | 0.90 | 2.35E-03 | 0.017       | Mitochondrial ribosome protein L22  |
| <i>Mrpl27</i>  | 0.88 | 4.33E-05 | 0.000976504 | Mitochondrial ribosome protein L27  |
| <i>Mrpl28</i>  | 0.93 | 7.23E-03 | 0.038       | Mitochondrial ribosome protein L28  |
| <i>Mrpl33</i>  | 0.89 | 6.63E-06 | 0.00025     | Mitochondrial ribosome protein L33  |
| <i>Mrpl34</i>  | 0.90 | 2.49E-07 | 2.24E-05    | Mitochondrial ribosome protein L34  |
| <i>Mrpl37</i>  | 0.91 | 9.92E-04 | 0.0094      | Mitochondrial ribosome protein L37  |
| <i>Mrpl38</i>  | 0.92 | 3.35E-05 | 0.00082     | Mitochondrial ribosome protein L38  |
| <i>Mrpl40</i>  | 0.91 | 7.69E-05 | 0.0015      | Mitochondrial ribosome protein L40  |
| <i>Mrpl41</i>  | 0.86 | 1.95E-03 | 0.015       | Mitochondrial ribosome protein L41  |
| <i>Mrpl43</i>  | 0.91 | 3.20E-06 | 0.00014     | Mitochondrial ribosome protein L43  |
| <i>Mrpl45</i>  | 0.86 | 1.24E-04 | 0.0021      | Mitochondrial ribosome protein L45  |
| <i>Mrpl46</i>  | 0.91 | 1.54E-04 | 0.0024      | Mitochondrial ribosome protein L46  |
| <i>Mrpl48</i>  | 0.88 | 1.01E-02 | 0.048       | Mitochondrial ribosome protein L48  |
| <i>Mrpl50</i>  | 0.95 | 8.98E-03 | 0.044       | Mitochondrial ribosome protein L50  |
| <i>Mrpl52</i>  | 0.89 | 6.83E-05 | 0.0013      | Mitochondrial ribosome protein L52  |
| <i>Mrpl53</i>  | 0.94 | 6.16E-03 | 0.033       | Mitochondrial ribosome protein L53  |
| <i>Mrpl54</i>  | 0.80 | 7.46E-07 | 5.09E-05    | Mitochondrial ribosome protein L54  |
| <i>Mrps6</i>   | 0.88 | 6.11E-08 | 8.51E-06    | Mitochondrial ribosome protein S6   |
| <i>Mrps7</i>   | 0.86 | 3.64E-06 | 0.000159927 | Mitochondrial ribosome protein S7   |
| <i>Mrps10</i>  | 0.92 | 5.82E-03 | 0.032       | Mitochondrial ribosome protein S10  |
| <i>Mrps11</i>  | 0.92 | 7.71E-04 | 0.0079      | Mitochondrial ribosome protein S11  |
| <i>Mrps12</i>  | 0.88 | 6.60E-07 | 4.67E-05    | Mitochondrial ribosome protein S12  |
| <i>Mrps17</i>  | 0.95 | 5.69E-04 | 0.0063      | Mitochondrial ribosome protein S17  |
| <i>Mrps18a</i> | 0.88 | 3.22E-05 | 0.00080     | Mitochondrial ribosome protein S18A |
| <i>Mrps18b</i> | 0.89 | 6.50E-04 | 0.0070      | Mitochondrial ribosome protein S18B |
| <i>Mrps21</i>  | 0.93 | 2.15E-03 | 0.016       | Mitochondrial ribosome protein S21  |
| <i>Mrps22</i>  | 0.93 | 1.93E-03 | 0.015       | Mitochondrial ribosome protein S22  |
| <i>Mrps23</i>  | 0.95 | 1.48E-03 | 0.012       | Mitochondrial ribosome protein S23  |
| <i>Mrps24</i>  | 0.84 | 7.91E-05 | 0.0015      | Mitochondrial ribosome protein S24  |
| <i>Mrps25</i>  | 0.78 | 1.87E-04 | 0.0028      | Mitochondrial ribosome protein S25  |
| <i>Mrps26</i>  | 0.94 | 6.37E-03 | 0.034       | Mitochondrial ribosome protein S26  |
| <i>Mrps27</i>  | 0.84 | 2.53E-04 | 0.0035      | Mitochondrial ribosome protein S27  |
| <i>Mrps28</i>  | 0.81 | 1.59E-05 | 0.00047     | Mitochondrial ribosome protein S28  |
| <i>Mrps30</i>  | 0.92 | 2.91E-04 | 0.0039      | Mitochondrial ribosome protein S30  |
| <i>Mrps31</i>  | 0.86 | 4.36E-05 | 0.000980284 | Mitochondrial ribosome protein S31  |
| <i>Mrps33</i>  | 0.92 | 5.03E-03 | 0.029       | Mitochondrial ribosome protein S33  |
| <i>Mrps34</i>  | 0.96 | 1.04E-03 | 0.0097      | Mitochondrial ribosome protein S34  |
| <i>Mrps35</i>  | 0.95 | 5.47E-03 | 0.031       | Mitochondrial ribosome protein S35  |

**Table S5 - List of P53-related genes dysregulated by alcohol in E17.5 fetal brain**

| <b>Gene</b>       | <b>Fold-Change,<br/>ALC/CON</b> | <b>P-value</b> | <b>P-adj value</b> |
|-------------------|---------------------------------|----------------|--------------------|
| <i>Aen</i>        | 0.83                            | 7.89E-06       | 0.00029            |
| <i>Afp</i>        | 6.51                            | 1.84E-10       | 1.34E-07           |
| <i>Aifm3</i>      | 1.33                            | 2.88E-05       | 0.00074            |
| <i>Apaf1</i>      | 1.03                            | 6.12E-04       | 0.0067             |
| <i>Apc</i>        | 1.07                            | 3.50E-05       | 0.00085            |
| <i>Bax</i>        | 0.95                            | 9.79E-03       | 0.047              |
| <i>Bcl2</i>       | 1.03                            | 6.34E-06       | 0.00024            |
| <i>Cbl</i>        | 1.16                            | 9.30E-09       | 2.07E-06           |
| <i>Cers6</i>      | 1.12                            | 1.18E-04       | 0.0020             |
| <i>Col18a1</i>    | 1.36                            | 3.08E-06       | 0.00014            |
| <i>Csf1</i>       | 1.14                            | 2.80E-03       | 0.019              |
| <i>Cst3</i>       | 0.84                            | 3.62E-05       | 0.00086002         |
| <i>Cycs</i>       | 0.87                            | 1.02E-02       | 0.048              |
| <i>Dsp</i>        | 1.26                            | 8.75E-04       | 0.0085             |
| <i>Dut</i>        | 0.84                            | 7.74E-05       | 0.0015             |
| <i>Ercc1</i>      | 0.90                            | 3.20E-03       | 0.021              |
| <i>Fdft1</i>      | 0.82                            | 1.29E-06       | 7.58E-05           |
| <i>Fdps</i>       | 0.86                            | 8.61E-05       | 0.0016             |
| <i>Fuca1</i>      | 0.90                            | 9.91E-03       | 0.047              |
| <i>Gadd45gip1</i> | 0.87                            | 2.94E-05       | 0.00075            |
| <i>Gamt</i>       | 0.83                            | 2.22E-03       | 0.016              |
| <i>Hic1</i>       | 1.23                            | 8.19E-04       | 0.0081             |
| <i>Hmgcr</i>      | 0.88                            | 7.86E-03       | 0.040              |
| <i>Hspa8</i>      | 0.90                            | 4.23E-04       | 0.0051             |
| <i>Htt</i>        | 1.00                            | 3.57E-05       | 0.00086            |
| <i>Irf2bp2</i>    | 1.09                            | 5.09E-03       | 0.029              |
| <i>Lonp1</i>      | 0.90                            | 3.63E-04       | 0.0046             |
| <i>Mdm1</i>       | 1.15                            | 6.94E-03       | 0.036              |
| <i>Mdm4</i>       | 1.20                            | 9.22E-04       | 0.0089             |
| <i>Mmp2</i>       | 1.27                            | 1.96E-06       | 0.00010274         |
| <i>Mpzl2</i>      | 1.66                            | 8.86E-04       | 0.0086             |
| <i>Mvk</i>        | 0.79                            | 3.33E-05       | 0.00082            |
| <i>Ndrp1</i>      | 1.14                            | 1.22E-03       | 0.011              |
| <i>Notch1</i>     | 1.03                            | 2.96E-03       | 0.020              |
| <i>Nov</i>        | 1.24                            | 1.12E-04       | 0.0019             |
| <i>Nsg1</i>       | 0.93                            | 5.00E-03       | 0.029              |
| <i>Ogn</i>        | 1.34                            | 8.31E-03       | 0.041              |
| <i>Pank1</i>      | 0.83                            | 3.85E-04       | 0.0048             |
| <i>Pebp1</i>      | 0.91                            | 5.75E-03       | 0.032              |
| <i>Pik3ca</i>     | 1.00                            | 5.93E-03       | 0.033              |
| <i>Pkd1</i>       | 0.98                            | 3.90E-04       | 0.0049             |
| <i>Plagl1</i>     | 1.20                            | 4.59E-04       | 0.0054             |
| <i>Pml</i>        | 1.07                            | 1.92E-03       | 0.015              |



|                |      |          |         |
|----------------|------|----------|---------|
| <i>Pten</i>    | 0.99 | 9.95E-03 | 0.047   |
| <i>Rabggta</i> | 0.87 | 7.29E-03 | 0.038   |
| <i>Rad23a</i>  | 0.92 | 1.23E-03 | 0.011   |
| <i>Rgcc</i>    | 0.85 | 5.31E-03 | 0.030   |
| <i>Sema3f</i>  | 1.14 | 1.32E-03 | 0.011   |
| <i>Steap3</i>  | 1.22 | 2.98E-03 | 0.020   |
| <i>Tgm2</i>    | 1.37 | 9.72E-06 | 0.00033 |
| <i>Ubtd1</i>   | 0.86 | 1.01E-02 | 0.048   |
| <i>Xpo1</i>    | 1.10 | 5.99E-04 | 0.0066  |
| <i>Zmat3</i>   | 1.04 | 2.02E-05 | 0.00057 |
